# Supplementary material for: Cu-Catalyzed P–C bond formation/cleavage: straightforward synthesis/ring-expansion of strained cyclic phosphoniums
Source: Royal Society of Chemistry journal article supplement (doi:10.1039/d0dt03059g), 2020-01-01
Supplement: d0dt03059g1.pdf [file d0dt03059g1.pdf]

## Supporting Information

|                                                                                                                   |     |
|-------------------------------------------------------------------------------------------------------------------|-----|
| 1. Materials and Methods .....                                                                                    | S2  |
| 2. Synthesis of phosphoniums .....                                                                                | S3  |
| i. Synthesis of phosphonium <b>4</b> .....                                                                        | S3  |
| ii. Synthesis of phosphoniums <b>7a</b> and <b>7b</b> .....                                                       | S3  |
| iii. Optimized catalytic conditions for the synthesis of phosphonium <b>2b</b> .....                              | S5  |
| iv. Synthesis of phosphonium <b>2e</b> .....                                                                      | S6  |
| v. Optimized conditions for the synthesis of phosphonium <b>2c</b> .....                                          | S6  |
| vi. Synthesis of phosphonium <b>2d</b> .....                                                                      | S7  |
| 3. Synthesis of Au(III) complexes.....                                                                            | S8  |
| i. Synthesis of (P,C)AuI <sub>2</sub> <b>8</b> starting from the phosphonium <b>2b</b> .....                      | S8  |
| ii. Synthesis of (P,C)AuBr <sub>2</sub> <b>10</b> starting from the <i>peri</i> -bromo phosphine <b>1-Br</b> .... | S9  |
| iii. Synthesis of (P,C)AuBr <sub>2</sub> <b>10</b> starting from the phosphonium <b>2e</b> .....                  | S10 |
| 4. Crystallographic data for complex <b>6a</b> .....                                                              | S11 |
| 5. NMR Spectra.....                                                                                               | S18 |
| 6. Computational details.....                                                                                     | S27 |
| 7. Z-matrices and energies in au.....                                                                             | S37 |
| 8. References .....                                                                                               | S59 |

## 1. Materials and Methods

Unless otherwise stated, all reactions and manipulations were carried out under an atmosphere of dry argon using standard Schlenk techniques or in a glovebox under an inert atmosphere. Dry, oxygen-free solvents were employed. Solution  $^1\text{H}$ ,  $^{13}\text{C}$ , and  $^{31}\text{P}$  NMR spectra were recorded on a Bruker Avance 300 and 500 spectrometers at 298 K. Chemical shifts ( $\delta$ ) are expressed with a positive sign, in parts per million.  $^1\text{H}$  and  $^{13}\text{C}$  chemical shifts reported are referenced internally to residual protio ( $^1\text{H}$ ) or deuterio ( $^{13}\text{C}$ ) solvent, while  $^{31}\text{P}$  chemical shifts are relative to 85%  $\text{H}_3\text{PO}_4$ . The following abbreviations and their combinations are used: br, broad; s, singlet; d, doublet; t, triplet; q, quartet; m, multiplet; hept, heptuplet. The  $^1\text{H}$  and  $^{13}\text{C}$  resonance signals were attributed by means of 2D COSY, HSQC and HMBC. Mass spectra were recorded on a Waters UPLC Xevo G2 Q TOF apparatus. Elemental analyses were performed by the in-house service at the *Laboratoire de Chimie de Coordination* (205, Route de Narbonne, 31077, Toulouse, France) on a PerkinElmer 2400 Series II system. Melting points were determined with a Stuart SMP40 apparatus. ICPMS analysis was performed using a quadrupole ICPMS (Agilent 7500Ce). Introduction was performed in wet plasma (nebulizer at 125 $\mu\text{l}/\text{min}$ , 1200W plasma) using a peltier effect and a collision cell to reduce oxides and interferences. The machine was calibrated every 2 hours using an in house standard and a geostandard was used to control precision and drift every 2 hours. For mineralization a sample of **2b** (0.9 mg) was dissolved in 70%  $\text{HNO}_3$  (TraceMetal Grade, Fisher Chemical, 2 mL), then the solution was diluted with deionized water (98 mL). All starting materials were purchased from Aldrich and used as received unless otherwise stated. 1-Iodo-8-diisopropylphosphinonaphthalene **1-I**, 1-bromo-8-diisopropylphosphinonaphthalene **1-Br**, 1-chloro-8-diisopropylphosphinonaphthalene **1-Cl**,<sup>[1]</sup> *peri*-bridged naphthyl-phosphonium **2a**,<sup>[2]</sup> 1-iodo-8-*N,N*-isopropylidiazaphospholidinonaphthalene **3**,<sup>[3]</sup> 1-iodo-8-diphenylphosphinonaphthalene **5**,<sup>[4]</sup> (P,C)-cyclometallated gold(III) di-iodide complex **8**<sup>[5]</sup> and dimethylsulfide gold bromide<sup>[6]</sup> were prepared according to the reported procedures.

## 2. Synthesis of phosphoniums

### i. Synthesis of phosphonium 4

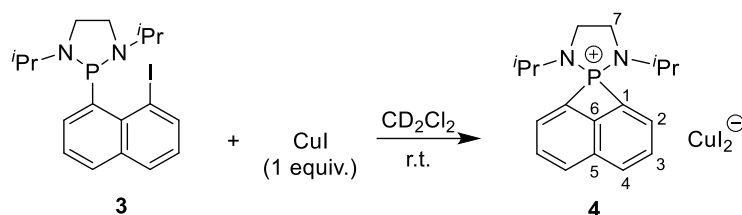

In a J Young valve NMR tube CuI (6.7 mg, 0.035 mmol) was suspended in 0.3 mL of CD<sub>2</sub>Cl<sub>2</sub> and a solution of 1-iodo-8-*N,N*-isopropylidiazaphospholidinonaphthalene **3** (15.0 mg, 0.035 mmol) in 0.3 mL of CD<sub>2</sub>Cl<sub>2</sub> was added. Color evolved from light yellow to colorless within a few minutes along with consumption of CuI. NMR analysis revealed complete conversion to the phosphonium **4**.

**<sup>1</sup>H NMR** (500 MHz, CD<sub>2</sub>Cl<sub>2</sub>): δ 8.28 (dd, 2H, <sup>3</sup>*J*<sub>HH</sub> = 8.3 Hz, *J*<sub>PH</sub> = 5.3 Hz, H<sub>2 or 4</sub>), 8.11 (dd, 2H, <sup>3</sup>*J*<sub>HH</sub> = 7.0 Hz, *J*<sub>PH</sub> = 14.0 Hz, H<sub>2 or 4</sub>), 8.03-7.92 (m, 2H, H<sub>3</sub>) 3.94 (s, 2H, H<sub>7</sub>), 3.92 (s, 2H, H<sub>7</sub>), 3.38-3.27 (m, 2H, CH*i*Pr), 1.22 (d, 12H, <sup>3</sup>*J*<sub>HH</sub> = 6.7 Hz, CH<sub>3</sub>*i*Pr); **<sup>13</sup>C{<sup>1</sup>H} NMR** (126 MHz, CD<sub>2</sub>Cl<sub>2</sub>): δ 153.7 (d, <sup>3</sup>*J*<sub>PC</sub> = 12.7 Hz, C<sub>6</sub>), 139.0 (d, <sup>1</sup>*J*<sub>PC</sub> = 104.7 Hz, C<sub>1</sub>), 132.8 (d, <sup>2</sup>*J*<sub>PC</sub> = 15.2 Hz, C<sub>3</sub>), 129.5 (d, *J*<sub>PC</sub> = 4.9 Hz, C<sub>2 or 4</sub>), 127.9 (d, <sup>3</sup>*J*<sub>PC</sub> = 23.1 Hz, C<sub>5</sub>), 127.2 (s, C<sub>2 or 4</sub>), 47.0 (d, <sup>2</sup>*J*<sub>PC</sub> = 8.0 Hz, CH*i*Pr), 42.5 (d, <sup>2</sup>*J*<sub>PC</sub> = 7.2 Hz, C<sub>7</sub>), 20.9 (d, <sup>3</sup>*J*<sub>PC</sub> = 3.5 Hz, CH<sub>3</sub>*i*Pr); **<sup>31</sup>P{<sup>1</sup>H} NMR** (202 MHz, CD<sub>2</sub>Cl<sub>2</sub>): δ 53.9. **HRMS (DCI-CH<sub>4</sub>)**: calcd for [M]<sup>+</sup> = C<sub>18</sub>H<sub>24</sub>N<sub>2</sub>P<sup>+</sup>: 299.1677. Found: 299.1675; **HRMS (DCI-CH<sub>4</sub>)**: calcd for [M]<sup>−</sup> = CuI<sub>2</sub><sup>−</sup>: 316.7386. Found: 316.7387.

### ii. Synthesis of phosphoniums 7a and 7b

#### Procedure A:

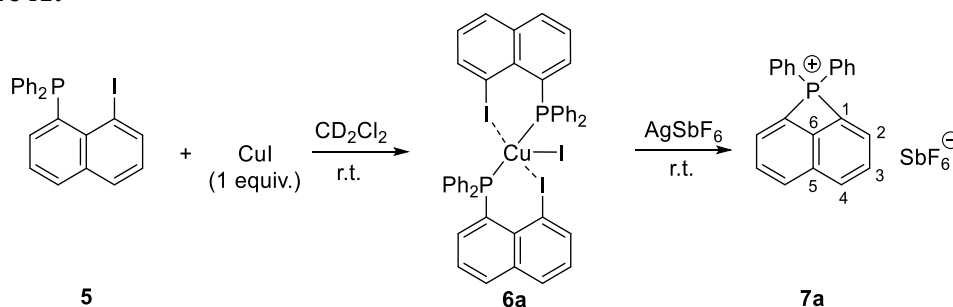

**NMR experiment:** In a J Young valve NMR tube, CuI (6.5 mg, 0.034 mmol) was suspended in 0.3 mL of CD<sub>2</sub>Cl<sub>2</sub> and a solution of 1-iodo-8-diphenylphosphinonaphthalene **5** (15.0 mg, 0.034 mmol) in 0.3 mL of CD<sub>2</sub>Cl<sub>2</sub> was added. After a few minutes, <sup>31</sup>P NMR analysis revealed formation of a single species in solution (δ -12.0 ppm). A white crystalline material started to precipitate and a crystal suitable for X-ray diffraction analysis could be extracted to reveal the

formation of the diphosphine Cu(I) complex **6a**. [HRMS (ESI+): calcd for  $[M-I]^+ = C_{44}H_{32}P_2CuI_2^+$ : 938.9365. Found: 938.9367.] AgSbF<sub>6</sub> (11.7 mg, 0.034 mmol) in 0.3 mL of CD<sub>2</sub>Cl<sub>2</sub> was then added to the mixture. NMR analysis showed immediate and complete conversion to phosphonium **7a**.

*Preparative manipulation:* In a glove-box, a vial was charged with CuI (43.5 mg, 0.228 mmol). A solution of 1-iodo-8-diphenylphosphinonaphthalene **5** (100.0 mg, 0.228 mmol) in 3.5 mL of CH<sub>2</sub>Cl<sub>2</sub> was added and the mixture was stirred for 30 minutes during which a pale yellow precipitate appeared. AgSbF<sub>6</sub> (78.4 mg, 0.228 mmol) was then added to the mixture and stirring was continued for another 30 minutes with the persistence of the white precipitate. Filtration over a Celite® pad and evaporation of the solvent afforded compound **7a** as a beige powder (85.0 mg, 68%).

**MP:** 138 °C; **<sup>1</sup>H NMR** (500 MHz, CD<sub>2</sub>Cl<sub>2</sub>): δ 8.32 (dd, <sup>3</sup>J<sub>HH</sub> = 8.5 Hz, J<sub>PH</sub> = 4.3 Hz, 2H, H<sub>2</sub> or 4), 8.13 (dd, <sup>3</sup>J<sub>HH</sub> = 7.0 Hz, J<sub>PH</sub> = 11.3 Hz, 2H, H<sub>2</sub> or 4), 8.01 (ddd, <sup>3</sup>J<sub>HH</sub> = 8.5 Hz, <sup>3</sup>J<sub>HH</sub> = 7.0 Hz, <sup>4</sup>J<sub>PH</sub> = 7.1 Hz, 2H, H<sub>3</sub>), 7.95-7.90 (m, 6H, H<sub>ortho Ph</sub> + H<sub>para Ph</sub>), 7.77-7.72 (m, 4H, H<sub>meta Ph</sub>); **<sup>13</sup>C{<sup>1</sup>H} NMR** (126 MHz, CD<sub>2</sub>Cl<sub>2</sub>): δ 153.0 (s, C<sub>6</sub>), 137.2 (d, <sup>4</sup>J<sub>PC</sub> = 3.4 Hz, C<sub>para Ph</sub>), 133.8 (d, <sup>2</sup>J<sub>PC</sub> = 13.2 Hz, C<sub>ortho Ph</sub>), 132.6 (d, <sup>3</sup>J<sub>PC</sub> = 13.9 Hz, C<sub>3</sub>), 131.0 (d, <sup>4</sup>J<sub>PC</sub> = 13.8 Hz, C<sub>meta Ph</sub>), 130.7 (d, J<sub>PC</sub> = 4.1 Hz, C<sub>2</sub> or 4), 128.6 (d, <sup>3</sup>J<sub>PC</sub> = 16.0 Hz, C<sub>5</sub>), 128.4 (d, <sup>3</sup>J<sub>PC</sub> = 92.9 Hz, C<sub>1</sub>), 126.9 (s, C<sub>2</sub> or 4), 118.5 (d, <sup>1</sup>J<sub>PC</sub> = 70.2 Hz, C<sub>ipso</sub>); **<sup>31</sup>P{<sup>1</sup>H} NMR** (202 MHz, CD<sub>2</sub>Cl<sub>2</sub>): δ 71.8; **HRMS (DCI-CH<sub>4</sub>)**: calcd for  $[M]^+ = C_{22}H_{16}P^+$ : 311.0990. Found: 311.0990; **HRMS (ESI-)**: calcd for  $[M]^- = SbF_6^-$ : 234.8942. Found: 234.8944; **Elemental Analysis**: calcd for C<sub>22</sub>H<sub>16</sub>F<sub>6</sub>PSb: C 48.30, H 2.95. Found: C 47.73, H 2.49.

### Procedure B:

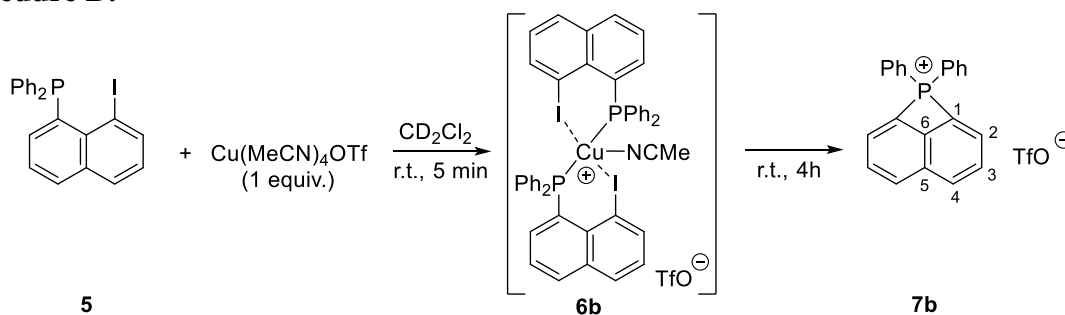

*NMR experiment:* In a J Young valve NMR tube, Cu(MeCN)<sub>4</sub>OTf (12.9 mg, 0.034 mmol) was suspended in 0.3 mL of CD<sub>2</sub>Cl<sub>2</sub> and a solution of 1-iodo-8-diphenylphosphinonaphthalene **5** (15.0 mg, 0.034 mmol) in 0.3 mL of CD<sub>2</sub>Cl<sub>2</sub> was added. After a few minutes, <sup>31</sup>P NMR analysis revealed formation of a single species in solution (δ -7.5 ppm, complex **6b**). This was accompanied by the formation of a white crystalline material. This species gradually evolved

to phosphonium **7b** after 4h at room temperature.  $^1\text{H}$  and  $^{31}\text{P}$  spectra of **7b** are similar to those of **7a** (see above). **HRMS (ESI-)**: calcd for  $[\text{M}]^- = \text{CF}_3\text{SO}_3^-$ : 148.9520. Found: 148.9522.

**iii.** Optimized catalytic conditions for the synthesis of phosphonium **2b**

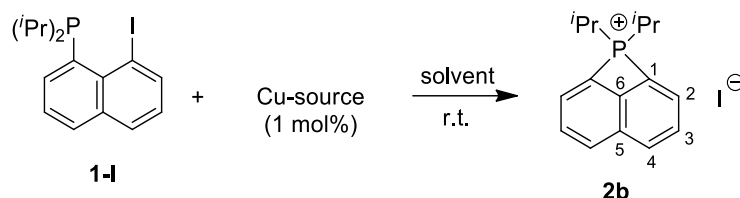

*NMR experiment:* In a J. Young valve NMR tube, the copper source (1 mol%) was suspended in 0.3 mL of solvent (see Table 2) and a solution of 1-iodo-8-diisopropylphosphinonaphthalene **1-I** (15.0 mg, 0.041 mmol) in 0.3 mL of the same solvent was added. Color evolved from light yellow to light red within a few minutes. The formation of the phosphonium **2b** was monitored by NMR spectroscopy.

*Preparative manipulations:*

**Conditions A** (Table 1, entry 3): In a glove-box,  $\text{Cu}(\text{MeCN})_4\text{OTf}$  (1.2 mg, 0.0031 mmol) was suspended in 2 mL of THF and a solution of 1-iodo-8-diisopropylphosphinonaphthalene **1-I** (113.0 mg, 0.31 mmol) in 1 mL of THF was added. Color evolved from light yellow to red within a few minutes. A white precipitate appeared during the reaction corresponding to the phosphonium **2b**. NMR analysis revealed complete conversion to the phosphonium species after 30 min. The precipitated solid was filtered and dried. The solution was concentrated to dryness *in vacuo*. The residue was washed with 1 mL of THF. The 2 crops were combined and dried to obtain a light yellow solid (101 mg, 89 %).

**Conditions B** (Table 1, entry 4): In a glove-box,  $\text{CuI}$  (0.5 mg, 0.0027 mmol) was suspended in 2.0 mL of MeCN and a solution of 1-iodo-8-diisopropylphosphinonaphthalene **1-I** (100.0 mg, 0.27 mmol) in 3.0 mL of MeCN was added. Color evolved from light yellow to red within a few seconds. NMR analysis revealed complete conversion to the phosphonium **2b** after 5 min. Volatiles were removed *in vacuo*. The crude product was washed with 2.0 mL of THF, filtrated and dried to obtain a light yellow solid (91 mg, 91 %).

**MP** : 216 °C.  $^1\text{H}$  NMR (300 MHz,  $\text{CD}_2\text{Cl}_2$ ):  $\delta$  8.22 (dd,  $J_{\text{PH}} = 9.0$  Hz,  $^3J_{\text{HH}} = 7.0$  Hz, 2H, H<sub>4</sub>), 8.13 (dd,  $J_{\text{PH}} = 8.5$  Hz,  $^3J_{\text{HH}} = 3.8$  Hz, 2H, H<sub>2</sub>), 7.85 (td,  $J_{\text{PH}} = 8.5$  Hz,  $^3J_{\text{HH}} = 6.5$  Hz, 2H, H<sub>3</sub>), 4.27 (hept d,  $^2J_{\text{PH}} = 9.5$  Hz,  $^3J_{\text{HH}} = 7.1$  Hz, 2H,  $\text{CHiPr}$ ), 1.41 (d,  $^3J_{\text{PH}} = 21.0$  Hz,  $^3J_{\text{HH}} = 7.1$  Hz, 12H,  $\text{CH}_3\text{iPr}$ );  $^{13}\text{C}\{^1\text{H}\}$  NMR (100 MHz,  $\text{CD}_2\text{Cl}_2$ ):  $\delta$  151.5 (s, C<sub>6</sub>), 131.4 (d,  $^1J_{\text{PC}} = 11.7$  Hz,

C<sub>3</sub>), 129.2 (d, <sup>2</sup>J<sub>PC</sub> = 3.5 Hz, C<sub>2</sub>), 128.9 (s, C<sub>4</sub>), 127.1 (d, <sup>2</sup>J<sub>PC</sub> = 14.3 Hz, C<sub>5</sub>), 126 (d, <sup>2</sup>J<sub>PC</sub> = 82.1 Hz, C<sub>1</sub>), 29.3 (d, <sup>2</sup>J<sub>PC</sub> = 28.9 Hz, CH*i*Pr), 18.3 (d, <sup>2</sup>J<sub>PC</sub> = 1.5 Hz, CH<sub>3</sub>*i*Pr); <sup>31</sup>P{<sup>1</sup>H} NMR (121 MHz, CD<sub>2</sub>Cl<sub>2</sub>): δ 117.5. **HRMS (ESI+)**: calcd for [M]<sup>+</sup> = C<sub>16</sub>H<sub>20</sub>P<sup>+</sup>: 243.1303. Found: 243.1310; **HRMS (ESI-)**: calcd for [M]<sup>-</sup> = I: 126.9050. Found: 126.9046. **Elemental Analysis**: calcd for C<sub>16</sub>H<sub>20</sub>PI: C 51.91, H 5.45. Found: C 52.07, H 5.57. **ICP-MS**: calcd 1706 ppm (based on 1 mol% CuI<sub>2</sub><sup>-</sup> in **2b**), found: 1865 ppm.

**iv. Synthesis of phosphonium 2e**

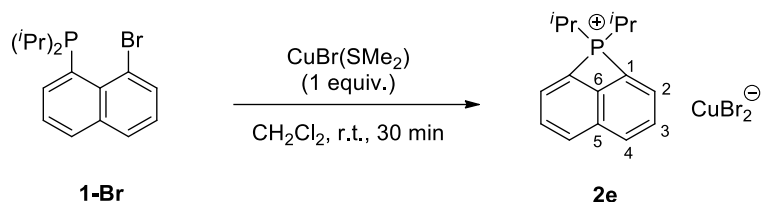

*NMR experiment*: In a J. Young valve NMR tube, CuBr(SMe)<sub>2</sub> (9.5 mg, 0.0464 mmol) was suspended in 0.3 mL of CH<sub>2</sub>Cl<sub>2</sub> and a solution of 1-bromo-8-diisopropylphosphinonaphthalene **1-Br** (15.0 mg, 0.0464 mmol) in 0.3 mL of CH<sub>2</sub>Cl<sub>2</sub> was added. Color evolved from yellow to light yellow within a few minutes. NMR analysis revealed complete conversion to the phosphonium species in 30 min at room temperature.

**HRMS (ESI-)**: calcd for [M]<sup>-</sup> = CuBr<sub>2</sub><sup>-</sup>: 222.7643. Found: 222.7648;

**v. Optimized conditions for the synthesis of phosphonium 2c**

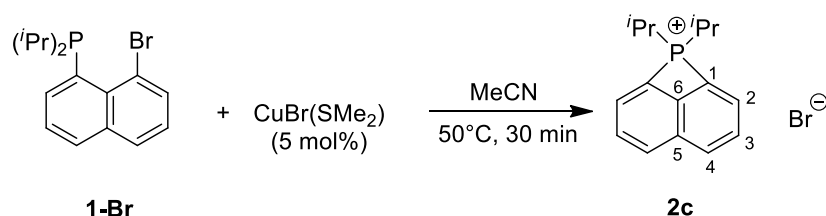

*NMR experiment*: In a J. Young valve NMR tube, CuBr(SMe)<sub>2</sub> (0.47 mg, 0.00232 mmol) was suspended in 0.3 mL of MeCN and a solution of 1-bromo-8-diisopropylphosphinonaphthalene **1-Br** (15.0 mg, 0.0464 mmol) in 0.3 mL of MeCN was added. Color evolved from yellow to light yellow within a few minutes. NMR analysis revealed complete conversion to the phosphonium species in 30 min at 50°C.

*Preparative manipulation*: 1-bromo-8-diisopropylphosphinonaphthalene **1-Br** (100.0 mg, 0.309 mmol) was suspended in 7 mL of MeCN and a solution of CuBr(SMe)<sub>2</sub> (2.8 mg, 0.0155 mmol) in 2 mL of MeCN was added. Color evolved from light yellow to orange and NMR analysis revealed complete conversion to the phosphonium **2c** after 30 min at 50°C. Volatiles

were removed under *vacuo*. The crude product was washed with 3 mL of THF, filtered and dried to afford a beige solid (82.7 mg, 82 %).

**MP** : 202 °C. **<sup>1</sup>H NMR** (300 MHz, CD<sub>2</sub>Cl<sub>2</sub>): δ 8.15 (dd,  $J_{PH} = 9.0$  Hz,  $^3J_{HH} = 6.8$  Hz 2H, H<sub>4</sub>), 8.09 (dd,  $J_{PH} = 8.4$  Hz,  $^3J_{HH} = 8.4$  Hz 2H, H<sub>2</sub>), 7.81 (td,  $J_{PH} = 8.5$  Hz,  $^3J_{HH} = 6.5$  Hz, 2H, H<sub>3</sub>), 4.18 (hept d,  $^3J_{HH} = 7.1$  Hz,  $^2J_{PH} = 3.7$  Hz, 2H, CH*i*Pr), 1.38 (dd,  $^3J_{PH} = 20.15$  Hz,  $^3J_{HH} = 7.1$  Hz, 12H, CH<sub>3</sub>*i*Pr); **<sup>13</sup>C{<sup>1</sup>H} NMR** (126 MHz, CD<sub>2</sub>Cl<sub>2</sub>): δ 151.8 (d,  $J_{PC} = 4.1$  Hz, C<sub>6</sub>), 131.3 (d,  $J_{PC} = 11.4$  Hz, C<sub>3</sub>), 128.8 (d,  $J_{PC} = 3.7$  Hz, C<sub>2</sub>), 128.7 (s, C<sub>4</sub>), 127.5 (d,  $J_{PC} = 83.2$  Hz, C<sub>1</sub>), 127.1 (d,  $J_{PC} = 14.9$  Hz, C<sub>5</sub>), 29.8 (d,  $^1J_{PC} = 30.3$  Hz, CH*i*Pr), 18.2 (d,  $^2J_{PC} = 1.3$  Hz, CH<sub>3</sub>*i*Pr); **<sup>31</sup>P{<sup>1</sup>H} NMR** (121 MHz, CD<sub>2</sub>Cl<sub>2</sub>): δ 113.9. **HRMS (ESI+)**: calcd for [M]<sup>+</sup> = C<sub>16</sub>H<sub>20</sub>P<sup>+</sup>: 243.1303. Found: 243.1314; **MS (DCI-NH<sub>3</sub>)**: calcd for [<sup>79</sup>Br]<sup>-</sup> = 78.92 (100%); for [<sup>81</sup>Br]<sup>-</sup> = 80.92 (97.3%). Found: 79.0 (95%); 81.0 (100%). **Elemental Analysis**: calcd for C<sub>16</sub>H<sub>20</sub>PBr: C 59.46, H 6.24. Found: C 59.86, H 6.58.

**vi. Synthesis of phosphonium 2d**

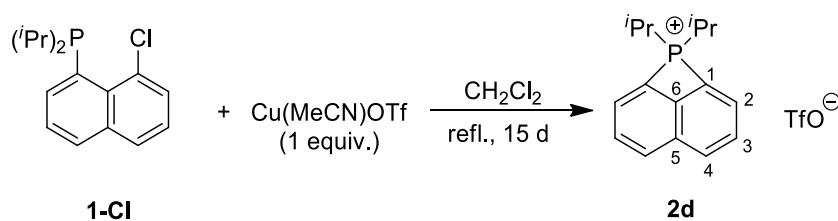

**NMR experiment**: In a J. Young valve NMR tube, Cu(MeCN)<sub>4</sub>OTf (20.3 mg, 0.0538 mmol) was suspended in 0.3 mL of CH<sub>2</sub>Cl<sub>2</sub> and a solution of 1-chloro-8-diisopropylphosphinonaphthalene **1-Cl** (15.0 mg, 0.0538 mmol) in 0.3 mL of CH<sub>2</sub>Cl<sub>2</sub> was added. After 15 days of reflux in CH<sub>2</sub>Cl<sub>2</sub>, <sup>31</sup>P NMR spectroscopy revealed complete conversion to the phosphonium **2d**.

**<sup>1</sup>H NMR** (300 MHz, CD<sub>2</sub>Cl<sub>2</sub>): δ 8.15 (dd,  $J_{PH} = 8.4$  Hz,  $^3J_{HH} = 3.7$  Hz, 2H, H<sub>4</sub>), 8.01 (dd,  $J_{PH} = 9.2$  Hz,  $^3J_{HH} = 6.9$  Hz 2H, H<sub>2</sub>), 7.87 (m, 2H, H<sub>3</sub>), 3.57 (hept d,  $^2J_{PH} = 7.1$  Hz,  $^3J_{HH} = 1.8$  Hz 2H, CH*i*Pr), 1.40 (d,  $^3J_{PH} = 20.7$  Hz,  $^3J_{HH} = 7.1$  Hz, 12H, CH<sub>3</sub>*i*Pr); **<sup>31</sup>P{<sup>1</sup>H} NMR** (121 MHz, CD<sub>2</sub>Cl<sub>2</sub>): δ 118.2. **HRMS (ESI-)**: calcd for [M]<sup>-</sup> = CF<sub>3</sub>SO<sub>3</sub><sup>-</sup>: 148.9520 Found : 148.9519.

### 3. Synthesis of Au(III) complexes

#### i. Synthesis of (P,C)AuI<sub>2</sub> **8** starting from the phosphonium **2b**

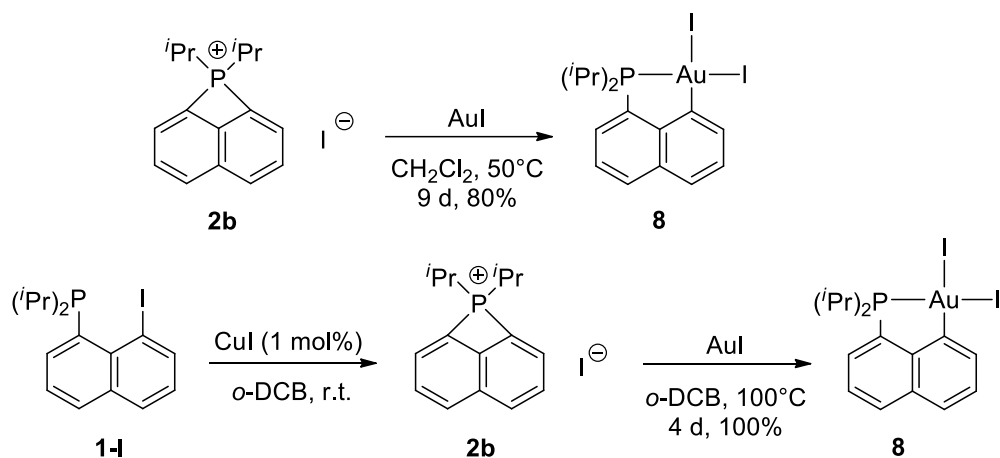

*NMR experiment:* In a J Young NMR tube, AuI (13 mg, 0.0405 mmol) was suspended in CH<sub>2</sub>Cl<sub>2</sub> (0.3 mL) and a solution of phosphonium **2b** (15 mg, 0.0405 mmol) in CH<sub>2</sub>Cl<sub>2</sub> (0.3 mL) was added. The reaction mixture was stirred at 50°C. <sup>31</sup>P NMR spectroscopy revealed 80% conversion to the gold(III) complex **8**<sup>[5]</sup> after 9 days.

*NMR experiment:* In a J. Young valve NMR tube, CuI (1 mol%) was suspended in 0.1 mL of *o*-DCB and a solution of 1-iodo-8-diisopropylphosphinonaphthalene **1-I** (20 mg, 0.054 mmol) in 0.4 mL of *o*-DCB was added. Conversion to the phosphonium **2b** was monitored by <sup>31</sup>P NMR spectroscopy. After complete conversion, AuI (17.5 mg, 0.054 mmol) was added in 0.2 mL of *o*-DCB and the reaction mixture was stirred at 100°C. NMR monitoring revealed complete conversion after 4 days.

*Preparative manipulation:* In a J. Young valve NMR tube, CuI (1 mol%) was suspended in 0.1 mL of *o*-DCB and a solution of 1-iodo-8-diisopropylphosphinonaphthalene **1-I** (100 mg, 0.27 mmol) in 0.4 mL of *o*-DCB was added. Conversion to the phosphonium **2b** was monitored by <sup>31</sup>P NMR spectroscopy. After complete conversion, AuI (87.4 mg, 0.27 mmol) was added in 0.2 mL of *o*-DCB and the reaction mixture was stirred at 100°C. NMR monitoring revealed complete conversion after 4 days. The reaction mixture was filtered, concentrated under vacuum and dried to afford the product **8** as an orange powder (154.2 mg, 82 %).



ii. Synthesis of (P,C)AuBr<sub>2</sub> **10** starting from the *peri*-bromo phosphine **1-Br**

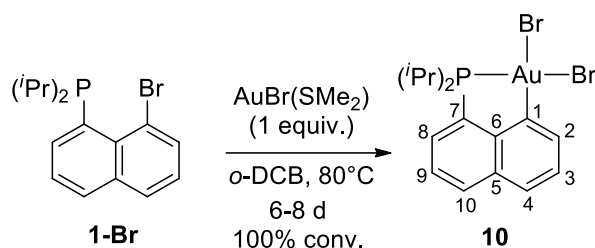

*NMR experiment:* In a J. Young valve NMR tube, AuBr(SMe<sub>2</sub>) (15.7 mg, 0.0464 mmol) was suspended in 0.2 mL of *o*-DCB and a solution of 1-bromo-8-diisopropylphosphinonaphthalene **1-Br** (15 mg, 0.0464 mmol) in 0.4 mL of *o*-DCB was added. The mixture was warmed to 80°C and NMR analysis revealed complete conversion to the product **10** after 6 days.

*Preparative manipulation:* In a Schlenk tube, AuBr(SMe<sub>2</sub>) (52 mg, 0.153 mmol) was suspended in 1 mL of *o*-DCB and a solution of 1-bromo-8-diisopropylphosphinonaphthalene **1-Br** (50 mg, 0.153 mmol) in 1.5 mL of *o*-DCB was added. The mixture was stirred for 8 days at 80°C. Volatiles were removed under vacuum to afford the product **10** as a white solid (86 mg; 93 %).

**MP** : 250 °C (dec.) **<sup>1</sup>H NMR** (500 MHz, CD<sub>2</sub>Cl<sub>2</sub>): δ 9.00 (ddd, <sup>3</sup>J<sub>HH</sub> = 7.7 Hz, <sup>4</sup>J<sub>HH</sub> = 0.86 Hz, J<sub>PH</sub> = 2.3 Hz, 1H, H<sub>2</sub>), 8.11 (dd, <sup>3</sup>J<sub>HH</sub> = 7.9 Hz, J<sub>PH</sub> = 3.4 Hz, 1H, H<sub>6</sub>), 7.87 (ddd, <sup>3</sup>J<sub>HH</sub> = 8.1 Hz, <sup>4</sup>J<sub>HH</sub> = 0.55 Hz, J<sub>PH</sub> = 2.9 Hz, 1H, H<sub>4</sub>), 7.80 (ddd, <sup>3</sup>J<sub>HH</sub> = 7.2 Hz, <sup>4</sup>J<sub>HH</sub> = 0.75 Hz, J<sub>PH</sub> = 9.9 Hz, 1H, H<sub>10</sub>), 7.65 (ddd, <sup>3</sup>J<sub>HH</sub> = 7.8 Hz, <sup>4</sup>J<sub>HH</sub> = 7.4 Hz, J<sub>PH</sub> = 3.6 Hz, 1H, H<sub>9</sub>), 7.51 (dd, <sup>3</sup>J<sub>HH</sub> = 7.9 Hz, 1H, H<sub>3</sub>), 3.36 (heptd, <sup>3</sup>J<sub>HH</sub> = 7.1 Hz, <sup>2</sup>J<sub>PH</sub> = 2.3 Hz, 2H, CH*i*Pr), 1.45 (dd, <sup>3</sup>J<sub>HH</sub> = 7.0 Hz, <sup>2</sup>J<sub>PH</sub> = 20.0 Hz, 6H, CH<sub>3</sub>*i*Pr), 1.35 (dd, <sup>3</sup>J<sub>HH</sub> = 7.0 Hz, <sup>2</sup>J<sub>PH</sub> = 18.6 Hz, 6H, CH<sub>3</sub>*i*Pr); **<sup>13</sup>C{<sup>1</sup>H} NMR** (126 MHz, CD<sub>2</sub>Cl<sub>2</sub>): δ 150.4 (d, J<sub>PC</sub> = 6.6 Hz, C<sub>1</sub>), 147.0 (d, J<sub>PC</sub> = 24.2 Hz, C<sub>6</sub>), 135.8 (d, J<sub>PC</sub> = 2.3 Hz, C<sub>2</sub>), 134.9 (d, J<sub>PC</sub> = 15.2 Hz, C<sub>5</sub>), 133.6 (d, J<sub>PC</sub> = 2.6 Hz, C<sub>8</sub>), 131.2 (d, J<sub>PC</sub> = 2.3 Hz, C<sub>10</sub>), 128.7 (s, C<sub>3</sub>), 127.6 (s, C<sub>4</sub>), 126.4 (d, J<sub>PC</sub> = 9.7 Hz, C<sub>9</sub>), 126.3 (d, J<sub>PC</sub> = 53.6 Hz, C<sub>7</sub>), 29.2 (d, <sup>1</sup>J<sub>PC</sub> = 3.4 Hz, CH*i*Pr), 18.3 (s, CH<sub>3</sub>*i*Pr), 17.8 (d, <sup>2</sup>J<sub>PC</sub> = 2.2 Hz, CH<sub>3</sub>*i*Pr); **<sup>31</sup>P{<sup>1</sup>H} NMR** (121 MHz, CD<sub>2</sub>Cl<sub>2</sub>): δ 106.1. **HRMS (ESI+)**: calcd for [M-Br]<sup>+</sup> = C<sub>16</sub>H<sub>20</sub>PAuBr<sup>+</sup>: 519.0152. Found: 519.0148. **Elemental Analysis**: calcd for C<sub>16</sub>H<sub>20</sub>PAuBr<sub>2</sub> : C 32.02, H 3.36. Found: C 32.00, H 3.49.

iii. Synthesis of (P,C)AuBr<sub>2</sub> **10** starting from the phosphonium **2e**

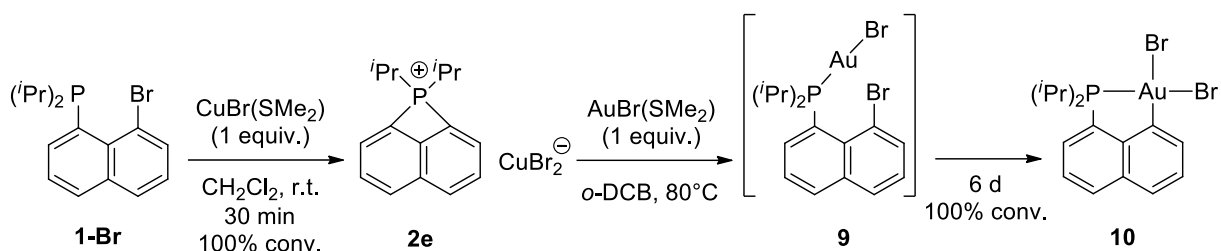

*NMR experiment:* In a J. Young valve NMR tube, the phosphonium **2e** was prepared freshly prior to use: CuBr(SMe<sub>2</sub>) (9.5 mg, 0.0464 mmol) was suspended in 0.1 mL of CH<sub>2</sub>Cl<sub>2</sub> and a solution of 1-bromo-8-diisopropylphosphinonaphthalene **1-Br** (15 mg, 0.0464 mmol) in 0.4 mL of CH<sub>2</sub>Cl<sub>2</sub> was added. After 30 min at r.t., <sup>31</sup>P NMR spectroscopy revealed complete conversion to the phosphonium **2e**. Then CH<sub>2</sub>Cl<sub>2</sub> was removed and AuBr(SMe<sub>2</sub>) (15.7 mg, 0.0464 mmol) was added in 0.5 mL of *o*-DCB and the reaction mixture was stirred at 80°C. NMR analysis that was performed after 1 hour, showed complete consumption of the starting phosphonium **2e**. It also revealed the formation of intermediate **9** (<sup>31</sup>P NMR resonance signal at δ 53.5 ppm) along with the product **10**. The reaction was continued and complete conversion to complex **10** was reached after 6 days at 80°C.

#### 4. Crystallographic data for complex 6a

Crystallographic data were collected at low temperature (193 K) on a Bruker-AXS APEX II CCD diffractometer equipped with a 30 W air-cooled microfocus source, using MoK $\alpha$  radiation ( $\lambda = 0.71073\text{\AA}$ ). Phi- and omega- scans were used. The data were integrated with SAINT, and an empirical absorption correction with SADABS was applied.<sup>[7]</sup> The structures were solved using an intrinsic phasing method (SHELXT)<sup>[8]</sup> and refined using the least-squares method on  $F^2$ .<sup>[9]</sup> All non-H atoms were refined with anisotropic displacement parameters. The H atoms were refined isotropically at calculated positions using a riding model. Some residual electron density due to the presence of disordered solvent were difficult to modelize. Therefore the SQUEEZE function of PLATON<sup>[10]</sup> was used to eliminate the contribution of the electron density in the solvent region from the intensity data, and the solvent-free model was employed for the final refinement.

CCDC-1998316 contains the supplementary crystallographic data for this paper. These data can be obtained free of charge from The Cambridge Crystallographic Data Centre via [www.ccdc.cam.ac.uk/data\\_request/cif](http://www.ccdc.cam.ac.uk/data_request/cif).

**Selected data for complex 6a :** C<sub>44</sub>H<sub>32</sub>CuI<sub>3</sub>P<sub>2</sub>,  $M = 1066.89$ , monoclinic, space group  $P2_1/n$ ,  $a = 10.971(2)\text{\AA}$ ,  $b = 18.180(3)\text{\AA}$ ,  $c = 20.965(3)\text{\AA}$ ,  $\beta = 102.961(7)^\circ$ ,  $V = 4075.0(12)\text{\AA}^3$ ,  $Z = 4$ , crystal size  $0.08 \times 0.04 \times 0.02\text{ mm}^3$ , 34032 reflections collected (8600 independent,  $R_{int} = 0.0766$ ), 451 parameters,  $R1 [I > 2\sigma(I)] = 0.0414$ ,  $wR2 [\text{all data}] = 0.0819$ , largest diff. peak and hole:  $0.624$  and  $-0.566\text{ e}\text{\AA}^{-3}$ .

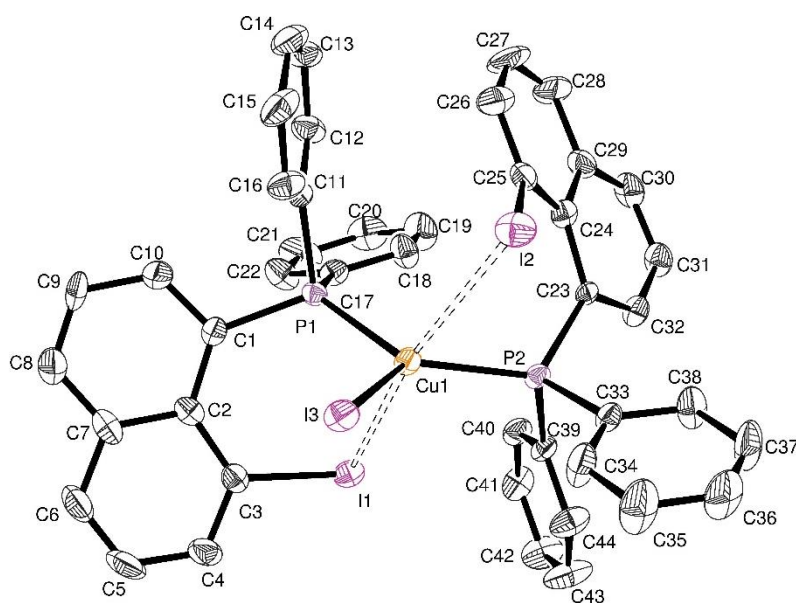

Table S1. Crystal data and structure refinement for complex **6a**.

|                                   |                                                                  |                        |
|-----------------------------------|------------------------------------------------------------------|------------------------|
| Identification code               | CHB148                                                           |                        |
| Empirical formula                 | C <sub>44</sub> H <sub>32</sub> Cu I <sub>3</sub> P <sub>2</sub> |                        |
| Formula weight                    | 1066.89                                                          |                        |
| Temperature                       | 193(2) K                                                         |                        |
| Wavelength                        | 0.71073 Å                                                        |                        |
| Crystal system                    | Monoclinic                                                       |                        |
| Space group                       | P2 <sub>1</sub> /n                                               |                        |
| Unit cell dimensions              | a = 10.971(2) Å                                                  | α = 90°.               |
|                                   | b = 18.180(3) Å                                                  | β = 102.961(7)°.       |
|                                   | c = 20.965(3) Å                                                  | γ = 90°.               |
| Volume                            | 4075.0(12) Å <sup>3</sup>                                        |                        |
| Z                                 | 4                                                                |                        |
| Density (calculated)              | 1.739 Mg/m <sup>3</sup>                                          |                        |
| Absorption coefficient            |                                                                  | 2.917 mm <sup>-1</sup> |
| F(000)                            | 2056                                                             |                        |
| Crystal size                      | 0.080 x 0.040 x 0.020 mm <sup>3</sup>                            |                        |
| Theta range for data collection   | 4.097 to 26.732°.                                                |                        |
| Index ranges                      | -13 ≤ h ≤ 13, -23 ≤ k ≤ 20, -26 ≤ l ≤ 26                         |                        |
| Reflections collected             | 34032                                                            |                        |
| Independent reflections           | 8600 [R(int) = 0.0766]                                           |                        |
| Completeness to theta = 25.242°   | 99.5 %                                                           |                        |
| Absorption correction             | Semi-empirical from equivalents                                  |                        |
| Max. and min. transmission        | 0.7457 and 0.6710                                                |                        |
| Refinement method                 | Full-matrix least-squares on F <sup>2</sup>                      |                        |
| Data / restraints / parameters    | 8600 / 0 / 451                                                   |                        |
| Goodness-of-fit on F <sup>2</sup> | 0.948                                                            |                        |
| Final R indices [I > 2σ(I)]       | R1 = 0.0414, wR2 = 0.0705                                        |                        |
| R indices (all data)              | R1 = 0.0808, wR2 = 0.0819                                        |                        |
| Largest diff. peak and hole       | 0.624 and -0.566 e.Å <sup>-3</sup>                               |                        |

Table S2. Atomic coordinates ( $\times 10^4$ ) and equivalent isotropic displacement parameters ( $\text{\AA}^2 \times 10^3$ ) for CHB148. U(eq) is defined as one third of the trace of the orthogonalized  $U^{\text{ij}}$  tensor.

|       | x        | y       | z        | U(eq) |
|-------|----------|---------|----------|-------|
| C(1)  | -96(5)   | 1093(3) | 7003(2)  | 24(1) |
| C(2)  | -891(5)  | 489(3)  | 7092(2)  | 22(1) |
| C(3)  | -817(5)  | 45(3)   | 7660(2)  | 25(1) |
| C(4)  | -1634(6) | -518(3) | 7691(3)  | 38(2) |
| C(5)  | -2593(6) | -676(4) | 7151(3)  | 54(2) |
| C(6)  | -2692(6) | -298(3) | 6590(3)  | 44(2) |
| C(7)  | -1854(5) | 270(3)  | 6543(3)  | 33(1) |
| C(8)  | -1951(6) | 590(4)  | 5926(3)  | 49(2) |
| C(9)  | -1108(7) | 1104(4) | 5832(3)  | 57(2) |
| C(10) | -210(6)  | 1362(3) | 6379(3)  | 39(2) |
| C(11) | 1045(5)  | 2514(3) | 7249(2)  | 20(1) |
| C(12) | 2063(5)  | 2773(3) | 7029(3)  | 31(1) |
| C(13) | 2074(6)  | 3478(3) | 6785(3)  | 39(2) |
| C(14) | 1073(7)  | 3940(3) | 6746(3)  | 43(2) |
| C(15) | 29(6)    | 3686(3) | 6957(3)  | 41(2) |
| C(16) | 21(5)    | 2986(3) | 7206(3)  | 32(1) |
| C(17) | 2532(5)  | 1236(3) | 7618(2)  | 24(1) |
| C(18) | 3552(5)  | 1467(3) | 8087(3)  | 33(1) |
| C(19) | 4761(5)  | 1248(4) | 8085(3)  | 42(2) |
| C(20) | 4956(6)  | 776(3)  | 7601(3)  | 43(2) |
| C(21) | 3960(6)  | 524(3)  | 7135(3)  | 48(2) |
| C(22) | 2755(5)  | 754(3)  | 7140(3)  | 35(2) |
| C(23) | 3327(5)  | 2299(3) | 9736(2)  | 19(1) |
| C(24) | 3585(5)  | 2846(3) | 9288(2)  | 22(1) |
| C(25) | 2706(5)  | 3329(3) | 8884(2)  | 27(1) |
| C(26) | 3026(6)  | 3764(3) | 8414(3)  | 41(2) |
| C(27) | 4239(7)  | 3769(4) | 8325(3)  | 52(2) |
| C(28) | 5152(6)  | 3384(4) | 8734(3)  | 45(2) |
| C(29) | 4855(5)  | 2941(3) | 9229(3)  | 30(1) |
| C(30) | 5830(5)  | 2581(3) | 9682(3)  | 33(1) |
| C(31) | 5575(5)  | 2149(3) | 10167(3) | 32(1) |
| C(32) | 4324(5)  | 1999(3) | 10173(2) | 24(1) |
| C(33) | 1148(5)  | 2177(3) | 10332(2) | 23(1) |
| C(34) | -113(6)  | 2142(3) | 10287(3) | 40(2) |
| C(35) | -620(6)  | 2337(4) | 10820(3) | 59(2) |
| C(36) | 144(6)   | 2591(4) | 11379(3) | 51(2) |
| C(37) | 1389(6)  | 2637(4) | 11426(3) | 48(2) |
| C(38) | 1908(5)  | 2430(3) | 10912(3) | 40(2) |
| C(39) | 2277(5)  | 902(3)  | 9939(2)  | 22(1) |
| C(40) | 3099(5)  | 500(3)  | 9654(2)  | 27(1) |
| C(41) | 3396(5)  | -213(3) | 9837(3)  | 32(1) |
| C(42) | 2882(6)  | -551(3) | 10293(3) | 40(2) |
| C(43) | 2044(6)  | -169(3) | 10572(3) | 50(2) |
| C(44) | 1761(5)  | 555(3)  | 10397(3) | 36(2) |
| P(1)  | 1008(1)  | 1613(1) | 7642(1)  | 19(1) |
| P(2)  | 1790(1)  | 1839(1) | 9654(1)  | 19(1) |
| Cu(1) | 529(1)   | 1760(1) | 8636(1)  | 22(1) |
| I(1)  | 664(1)   | 101(1)  | 8493(1)  | 27(1) |
| I(2)  | 923(1)   | 3518(1) | 9057(1)  | 37(1) |
| I(3)  | -1844(1) | 1988(1) | 8424(1)  | 29(1) |

Table S3. Bond lengths [Å] and angles [°] for CHB148.

|             |          |                  |            |
|-------------|----------|------------------|------------|
| C(1)-C(10)  | 1.377(7) | C(32)-H(32)      | 0.9500     |
| C(1)-C(2)   | 1.441(7) | C(33)-C(34)      | 1.367(7)   |
| C(1)-P(1)   | 1.850(5) | C(33)-C(38)      | 1.389(7)   |
| C(2)-C(3)   | 1.425(7) | C(33)-P(2)       | 1.829(5)   |
| C(2)-C(7)   | 1.434(7) | C(34)-C(35)      | 1.401(7)   |
| C(3)-C(4)   | 1.372(7) | C(34)-H(34)      | 0.9500     |
| C(3)-I(1)   | 2.104(5) | C(35)-C(36)      | 1.360(8)   |
| C(4)-C(5)   | 1.391(8) | C(35)-H(35)      | 0.9500     |
| C(4)-H(4)   | 0.9500   | C(36)-C(37)      | 1.350(8)   |
| C(5)-C(6)   | 1.346(8) | C(36)-H(36)      | 0.9500     |
| C(5)-H(5)   | 0.9500   | C(37)-C(38)      | 1.380(7)   |
| C(6)-C(7)   | 1.400(7) | C(37)-H(37)      | 0.9500     |
| C(6)-H(6)   | 0.9500   | C(38)-H(38)      | 0.9500     |
| C(7)-C(8)   | 1.399(8) | C(39)-C(44)      | 1.372(7)   |
| C(8)-C(9)   | 1.361(8) | C(39)-C(40)      | 1.396(7)   |
| C(8)-H(8)   | 0.9500   | C(39)-P(2)       | 1.844(5)   |
| C(9)-C(10)  | 1.413(8) | C(40)-C(41)      | 1.370(7)   |
| C(9)-H(9)   | 0.9500   | C(40)-H(40)      | 0.9500     |
| C(10)-H(10) | 0.9500   | C(41)-C(42)      | 1.361(7)   |
| C(11)-C(12) | 1.383(7) | C(41)-H(41)      | 0.9500     |
| C(11)-C(16) | 1.402(7) | C(42)-C(43)      | 1.382(8)   |
| C(11)-P(1)  | 1.837(5) | C(42)-H(42)      | 0.9500     |
| C(12)-C(13) | 1.381(8) | C(43)-C(44)      | 1.384(8)   |
| C(12)-H(12) | 0.9500   | C(43)-H(43)      | 0.9500     |
| C(13)-C(14) | 1.371(8) | C(44)-H(44)      | 0.9500     |
| C(13)-H(13) | 0.9500   | P(1)-Cu(1)       | 2.2763(14) |
| C(14)-C(15) | 1.395(8) | P(2)-Cu(1)       | 2.2723(14) |
| C(14)-H(14) | 0.9500   | Cu(1)-I(3)       | 2.5749(8)  |
| C(15)-C(16) | 1.376(7) | Cu(1)-I(2)       | 3.319(10)  |
| C(15)-H(15) | 0.9500   | Cu(1)-I(1)       | 3.0372(9)  |
| C(16)-H(16) | 0.9500   |                  |            |
| C(17)-C(18) | 1.379(7) | C(10)-C(1)-C(2)  | 117.7(5)   |
| C(17)-C(22) | 1.393(7) | C(10)-C(1)-P(1)  | 114.3(4)   |
| C(17)-P(1)  | 1.819(5) | C(2)-C(1)-P(1)   | 127.8(4)   |
| C(18)-C(19) | 1.386(7) | C(3)-C(2)-C(7)   | 114.1(5)   |
| C(18)-H(18) | 0.9500   | C(3)-C(2)-C(1)   | 128.1(5)   |
| C(19)-C(20) | 1.383(8) | C(7)-C(2)-C(1)   | 117.8(5)   |
| C(19)-H(19) | 0.9500   | C(4)-C(3)-C(2)   | 123.1(5)   |
| C(20)-C(21) | 1.370(8) | C(4)-C(3)-I(1)   | 112.8(4)   |
| C(20)-H(20) | 0.9500   | C(2)-C(3)-I(1)   | 123.7(4)   |
| C(21)-C(22) | 1.389(8) | C(3)-C(4)-C(5)   | 119.9(6)   |
| C(21)-H(21) | 0.9500   | C(3)-C(4)-H(4)   | 120.1      |
| C(22)-H(22) | 0.9500   | C(5)-C(4)-H(4)   | 120.1      |
| C(23)-C(32) | 1.374(6) | C(6)-C(5)-C(4)   | 120.3(6)   |
| C(23)-C(24) | 1.438(7) | C(6)-C(5)-H(5)   | 119.9      |
| C(23)-P(2)  | 1.855(5) | C(4)-C(5)-H(5)   | 119.9      |
| C(24)-C(25) | 1.433(7) | C(5)-C(6)-C(7)   | 120.8(6)   |
| C(24)-C(29) | 1.436(7) | C(5)-C(6)-H(6)   | 119.6      |
| C(25)-C(26) | 1.369(7) | C(7)-C(6)-H(6)   | 119.6      |
| C(25)-I(2)  | 2.097(5) | C(6)-C(7)-C(8)   | 117.2(5)   |
| C(26)-C(27) | 1.385(8) | C(6)-C(7)-C(2)   | 121.6(5)   |
| C(26)-H(26) | 0.9500   | C(8)-C(7)-C(2)   | 121.1(5)   |
| C(27)-C(28) | 1.358(8) | C(9)-C(8)-C(7)   | 120.4(6)   |
| C(27)-H(27) | 0.9500   | C(9)-C(8)-H(8)   | 119.8      |
| C(28)-C(29) | 1.409(7) | C(7)-C(8)-H(8)   | 119.8      |
| C(28)-H(28) | 0.9500   | C(8)-C(9)-C(10)  | 118.9(6)   |
| C(29)-C(30) | 1.421(7) | C(8)-C(9)-H(9)   | 120.5      |
| C(30)-C(31) | 1.361(7) | C(10)-C(9)-H(9)  | 120.5      |
| C(30)-H(30) | 0.9500   | C(1)-C(10)-C(9)  | 123.5(6)   |
| C(31)-C(32) | 1.403(7) | C(1)-C(10)-H(10) | 118.3      |
| C(31)-H(31) | 0.9500   | C(9)-C(10)-H(10) | 118.3      |

|                   |          |                   |            |
|-------------------|----------|-------------------|------------|
| C(12)-C(11)-C(16) | 117.7(5) | C(32)-C(31)-H(31) | 120.5      |
| C(12)-C(11)-P(1)  | 123.6(4) | C(23)-C(32)-C(31) | 123.4(5)   |
| C(16)-C(11)-P(1)  | 118.5(4) | C(23)-C(32)-H(32) | 118.3      |
| C(11)-C(12)-C(13) | 121.0(5) | C(31)-C(32)-H(32) | 118.3      |
| C(11)-C(12)-H(12) | 119.5    | C(34)-C(33)-C(38) | 118.4(5)   |
| C(13)-C(12)-H(12) | 119.5    | C(34)-C(33)-P(2)  | 119.4(4)   |
| C(14)-C(13)-C(12) | 121.1(6) | C(38)-C(33)-P(2)  | 122.1(4)   |
| C(14)-C(13)-H(13) | 119.4    | C(33)-C(34)-C(35) | 120.7(5)   |
| C(12)-C(13)-H(13) | 119.4    | C(33)-C(34)-H(34) | 119.7      |
| C(13)-C(14)-C(15) | 118.8(6) | C(35)-C(34)-H(34) | 119.7      |
| C(13)-C(14)-H(14) | 120.6    | C(36)-C(35)-C(34) | 119.7(6)   |
| C(15)-C(14)-H(14) | 120.6    | C(36)-C(35)-H(35) | 120.1      |
| C(16)-C(15)-C(14) | 120.1(6) | C(34)-C(35)-H(35) | 120.1      |
| C(16)-C(15)-H(15) | 119.9    | C(37)-C(36)-C(35) | 120.1(6)   |
| C(14)-C(15)-H(15) | 119.9    | C(37)-C(36)-H(36) | 120.0      |
| C(15)-C(16)-C(11) | 121.2(5) | C(35)-C(36)-H(36) | 120.0      |
| C(15)-C(16)-H(16) | 119.4    | C(36)-C(37)-C(38) | 121.0(6)   |
| C(11)-C(16)-H(16) | 119.4    | C(36)-C(37)-H(37) | 119.5      |
| C(18)-C(17)-C(22) | 117.4(5) | C(38)-C(37)-H(37) | 119.5      |
| C(18)-C(17)-P(1)  | 118.0(4) | C(37)-C(38)-C(33) | 120.1(5)   |
| C(22)-C(17)-P(1)  | 124.5(4) | C(37)-C(38)-H(38) | 119.9      |
| C(17)-C(18)-C(19) | 122.3(5) | C(33)-C(38)-H(38) | 119.9      |
| C(17)-C(18)-H(18) | 118.9    | C(44)-C(39)-C(40) | 117.8(5)   |
| C(19)-C(18)-H(18) | 118.9    | C(44)-C(39)-P(2)  | 121.1(4)   |
| C(20)-C(19)-C(18) | 119.1(6) | C(40)-C(39)-P(2)  | 120.9(4)   |
| C(20)-C(19)-H(19) | 120.4    | C(41)-C(40)-C(39) | 120.8(5)   |
| C(18)-C(19)-H(19) | 120.4    | C(41)-C(40)-H(40) | 119.6      |
| C(21)-C(20)-C(19) | 120.0(6) | C(39)-C(40)-H(40) | 119.6      |
| C(21)-C(20)-H(20) | 120.0    | C(42)-C(41)-C(40) | 120.9(5)   |
| C(19)-C(20)-H(20) | 120.0    | C(42)-C(41)-H(41) | 119.6      |
| C(20)-C(21)-C(22) | 120.2(6) | C(40)-C(41)-H(41) | 119.6      |
| C(20)-C(21)-H(21) | 119.9    | C(41)-C(42)-C(43) | 119.4(5)   |
| C(22)-C(21)-H(21) | 119.9    | C(41)-C(42)-H(42) | 120.3      |
| C(21)-C(22)-C(17) | 121.0(6) | C(43)-C(42)-H(42) | 120.3      |
| C(21)-C(22)-H(22) | 119.5    | C(42)-C(43)-C(44) | 119.7(5)   |
| C(17)-C(22)-H(22) | 119.5    | C(42)-C(43)-H(43) | 120.1      |
| C(32)-C(23)-C(24) | 117.8(5) | C(44)-C(43)-H(43) | 120.1      |
| C(32)-C(23)-P(2)  | 117.0(4) | C(39)-C(44)-C(43) | 121.4(5)   |
| C(24)-C(23)-P(2)  | 124.0(4) | C(39)-C(44)-H(44) | 119.3      |
| C(25)-C(24)-C(29) | 114.4(5) | C(43)-C(44)-H(44) | 119.3      |
| C(25)-C(24)-C(23) | 127.2(5) | C(17)-P(1)-C(11)  | 102.2(2)   |
| C(29)-C(24)-C(23) | 118.4(5) | C(17)-P(1)-C(1)   | 104.1(2)   |
| C(26)-C(25)-C(24) | 122.2(5) | C(11)-P(1)-C(1)   | 102.0(2)   |
| C(26)-C(25)-I(2)  | 115.4(4) | C(17)-P(1)-Cu(1)  | 118.09(17) |
| C(24)-C(25)-I(2)  | 121.9(4) | C(11)-P(1)-Cu(1)  | 109.82(16) |
| C(25)-C(26)-C(27) | 120.6(6) | C(1)-P(1)-Cu(1)   | 118.29(17) |
| C(25)-C(26)-H(26) | 119.7    | C(33)-P(2)-C(39)  | 101.1(2)   |
| C(27)-C(26)-H(26) | 119.7    | C(33)-P(2)-C(23)  | 106.1(2)   |
| C(28)-C(27)-C(26) | 120.5(6) | C(39)-P(2)-C(23)  | 101.3(2)   |
| C(28)-C(27)-H(27) | 119.8    | C(33)-P(2)-Cu(1)  | 119.48(18) |
| C(26)-C(27)-H(27) | 119.8    | C(39)-P(2)-Cu(1)  | 108.46(17) |
| C(27)-C(28)-C(29) | 120.0(6) | C(23)-P(2)-Cu(1)  | 117.73(15) |
| C(27)-C(28)-H(28) | 120.0    | P(2)-Cu(1)-P(1)   | 130.58(6)  |
| C(29)-C(28)-H(28) | 120.0    | P(2)-Cu(1)-I(3)   | 122.07(4)  |
| C(28)-C(29)-C(30) | 119.4(5) | P(1)-Cu(1)-I(3)   | 107.01(4)  |
| C(28)-C(29)-C(24) | 121.4(5) | P(2)-Cu(1)-I(1)   | 97.08(4)   |
| C(30)-C(29)-C(24) | 119.2(5) | P(1)-Cu(1)-I(1)   | 76.55(4)   |
| C(31)-C(30)-C(29) | 120.9(5) | I(3)-Cu(1)-I(1)   | 102.29(2)  |
| C(31)-C(30)-H(30) | 119.5    | C(3)-I(1)-Cu(1)   | 94.84(14)  |
| C(29)-C(30)-H(30) | 119.5    | I(1)-Cu-I(2)      | 167.49(4)  |
| C(30)-C(31)-C(32) | 119.0(5) |                   |            |
| C(30)-C(31)-H(31) | 120.5    |                   |            |

Table S4. Anisotropic displacement parameters ( $\text{\AA}^2 \times 10^3$ ) for CHB148. The anisotropic displacement factor exponent takes the form:  $-2\pi^2 [ h^2 a^{*2} U^{11} + \dots + 2 h k a^* b^* U^{12} ]$

|       | U <sup>11</sup> | U <sup>22</sup> | U <sup>33</sup> | U <sup>23</sup> | U <sup>13</sup> | U <sup>12</sup> |
|-------|-----------------|-----------------|-----------------|-----------------|-----------------|-----------------|
| C(1)  | 24(3)           | 27(3)           | 19(3)           | 0(2)            | 4(2)            | 1(2)            |
| C(2)  | 16(3)           | 23(3)           | 30(3)           | -6(3)           | 10(2)           | 1(2)            |
| C(3)  | 23(3)           | 27(3)           | 25(3)           | -6(3)           | 8(2)            | -2(2)           |
| C(4)  | 43(4)           | 42(4)           | 34(4)           | -11(3)          | 22(3)           | -20(3)          |
| C(5)  | 51(5)           | 61(5)           | 54(5)           | -13(4)          | 22(4)           | -40(4)          |
| C(6)  | 32(4)           | 55(4)           | 42(4)           | -13(3)          | 4(3)            | -20(3)          |
| C(7)  | 25(3)           | 31(4)           | 40(4)           | -8(3)           | 1(3)            | -5(3)           |
| C(8)  | 56(5)           | 46(4)           | 35(4)           | 6(3)            | -12(3)          | -15(4)          |
| C(9)  | 76(5)           | 60(5)           | 20(3)           | 7(3)            | -18(3)          | -22(4)          |
| C(10) | 57(4)           | 29(4)           | 28(3)           | 2(3)            | 4(3)            | -14(3)          |
| C(11) | 22(3)           | 23(3)           | 15(3)           | 0(2)            | 6(2)            | -3(2)           |
| C(12) | 32(3)           | 29(3)           | 36(3)           | -4(3)           | 16(3)           | -7(3)           |
| C(13) | 51(4)           | 38(4)           | 35(4)           | -1(3)           | 23(3)           | -17(3)          |
| C(14) | 82(5)           | 26(4)           | 24(3)           | 3(3)            | 18(3)           | -4(4)           |
| C(15) | 68(5)           | 33(4)           | 25(3)           | 4(3)            | 17(3)           | 12(3)           |
| C(16) | 37(4)           | 34(4)           | 31(3)           | 5(3)            | 18(3)           | -1(3)           |
| C(17) | 20(3)           | 28(3)           | 25(3)           | 2(3)            | 10(2)           | 2(2)            |
| C(18) | 21(3)           | 45(4)           | 34(3)           | -11(3)          | 9(3)            | -5(3)           |
| C(19) | 18(3)           | 64(5)           | 46(4)           | -5(4)           | 9(3)            | -1(3)           |
| C(20) | 23(3)           | 50(4)           | 59(4)           | 12(4)           | 13(3)           | 11(3)           |
| C(21) | 42(4)           | 41(4)           | 69(5)           | -12(4)          | 35(4)           | 2(3)            |
| C(22) | 29(3)           | 34(4)           | 46(4)           | -12(3)          | 17(3)           | -5(3)           |
| C(23) | 19(3)           | 26(3)           | 14(2)           | -2(2)           | 9(2)            | -4(2)           |
| C(24) | 21(3)           | 27(3)           | 21(3)           | -4(2)           | 10(2)           | 1(2)            |
| C(25) | 29(3)           | 29(3)           | 25(3)           | -7(3)           | 9(2)            | -11(3)          |
| C(26) | 46(4)           | 37(4)           | 38(4)           | 12(3)           | 9(3)            | -6(3)           |
| C(27) | 56(5)           | 65(5)           | 40(4)           | 25(4)           | 21(4)           | -16(4)          |
| C(28) | 41(4)           | 59(5)           | 40(4)           | 10(3)           | 22(3)           | -18(3)          |
| C(29) | 24(3)           | 34(3)           | 31(3)           | -4(3)           | 8(2)            | -10(3)          |
| C(30) | 16(3)           | 46(4)           | 37(3)           | -7(3)           | 5(3)            | -3(3)           |
| C(31) | 20(3)           | 42(4)           | 30(3)           | -2(3)           | 0(2)            | 0(3)            |
| C(32) | 20(3)           | 32(3)           | 21(3)           | 1(2)            | 3(2)            | 6(3)            |
| C(33) | 25(3)           | 29(3)           | 17(3)           | 0(2)            | 7(2)            | 1(2)            |
| C(34) | 33(4)           | 65(5)           | 22(3)           | -6(3)           | 5(3)            | 3(3)            |
| C(35) | 34(4)           | 109(7)          | 39(4)           | -16(4)          | 16(3)           | 2(4)            |
| C(36) | 40(4)           | 87(6)           | 36(4)           | -16(4)          | 26(3)           | 1(4)            |
| C(37) | 46(4)           | 73(5)           | 26(3)           | -21(3)          | 10(3)           | -1(4)           |
| C(38) | 20(3)           | 71(5)           | 31(3)           | -20(3)          | 15(3)           | -8(3)           |
| C(39) | 20(3)           | 27(3)           | 17(3)           | 6(2)            | 4(2)            | 2(2)            |
| C(40) | 25(3)           | 36(4)           | 24(3)           | 2(3)            | 11(2)           | 0(3)            |
| C(41) | 36(4)           | 33(4)           | 30(3)           | 1(3)            | 10(3)           | 14(3)           |
| C(42) | 48(4)           | 24(3)           | 52(4)           | 15(3)           | 17(3)           | 18(3)           |
| C(43) | 68(5)           | 39(4)           | 57(4)           | 18(3)           | 43(4)           | 10(4)           |
| C(44) | 48(4)           | 30(4)           | 37(4)           | 6(3)            | 27(3)           | 12(3)           |
| P(1)  | 17(1)           | 20(1)           | 21(1)           | 0(1)            | 5(1)            | -1(1)           |
| P(2)  | 16(1)           | 25(1)           | 17(1)           | 3(1)            | 5(1)            | 1(1)            |
| Cu(1) | 17(1)           | 30(1)           | 20(1)           | 2(1)            | 5(1)            | 0(1)            |
| I(1)  | 31(1)           | 24(1)           | 28(1)           | 6(1)            | 8(1)            | 3(1)            |
| I(2)  | 30(1)           | 33(1)           | 46(1)           | 10(1)           | 6(1)            | 7(1)            |
| I(3)  | 17(1)           | 39(1)           | 32(1)           | 8(1)            | 7(1)            | 2(1)            |



Table S5. Hydrogen coordinates ( $\times 10^4$ ) and isotropic displacement parameters ( $\text{\AA}^2 \times 10^{-3}$ ) for CHB148.

|       | x     | y     | z     | U(eq) |
|-------|-------|-------|-------|-------|
| H(4)  | -1544 | -800  | 8080  | 45    |
| H(5)  | -3181 | -1051 | 7179  | 64    |
| H(6)  | -3339 | -417  | 6221  | 53    |
| H(8)  | -2610 | 446   | 5571  | 59    |
| H(9)  | -1123 | 1287  | 5406  | 68    |
| H(10) | 345   | 1741  | 6312  | 46    |
| H(12) | 2765  | 2462  | 7047  | 37    |
| H(13) | 2788  | 3645  | 6641  | 47    |
| H(14) | 1089  | 4424  | 6578  | 52    |
| H(15) | -677  | 3997  | 6929  | 49    |
| H(16) | -692  | 2821  | 7351  | 39    |
| H(18) | 3422  | 1789  | 8423  | 40    |
| H(19) | 5447  | 1419  | 8413  | 51    |
| H(20) | 5781  | 626   | 7590  | 52    |
| H(21) | 4093  | 191   | 6809  | 57    |
| H(22) | 2072  | 581   | 6812  | 42    |
| H(26) | 2409  | 4066  | 8146  | 49    |
| H(27) | 4434  | 4044  | 7976  | 63    |
| H(28) | 5992  | 3413  | 8686  | 54    |
| H(30) | 6672  | 2642  | 9646  | 40    |
| H(31) | 6235  | 1953  | 10496 | 38    |
| H(32) | 4158  | 1671  | 10497 | 29    |
| H(34) | -651  | 1983  | 9891  | 48    |
| H(35) | -1493 | 2292  | 10791 | 71    |
| H(36) | -199  | 2736  | 11738 | 62    |
| H(37) | 1916  | 2814  | 11819 | 58    |
| H(38) | 2787  | 2461  | 10954 | 47    |
| H(40) | 3458  | 723   | 9330  | 33    |
| H(41) | 3967  | -476  | 9642  | 39    |
| H(42) | 3099  | -1044 | 10419 | 49    |
| H(43) | 1663  | -403  | 10883 | 60    |
| H(44) | 1198  | 818   | 10597 | 43    |

## 5. NMR Spectra

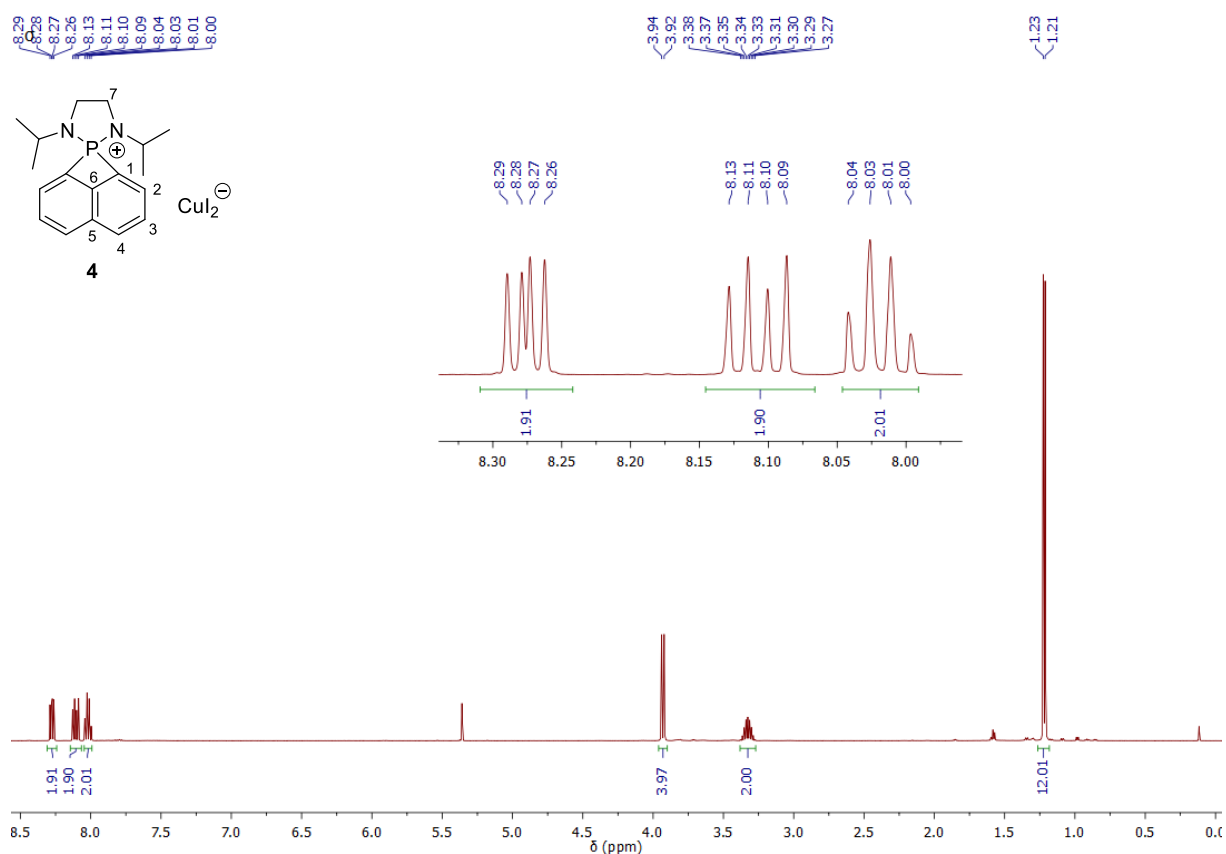

**Figure S1:**  $^1\text{H}$  NMR spectrum of **4** in  $\text{CD}_2\text{Cl}_2$

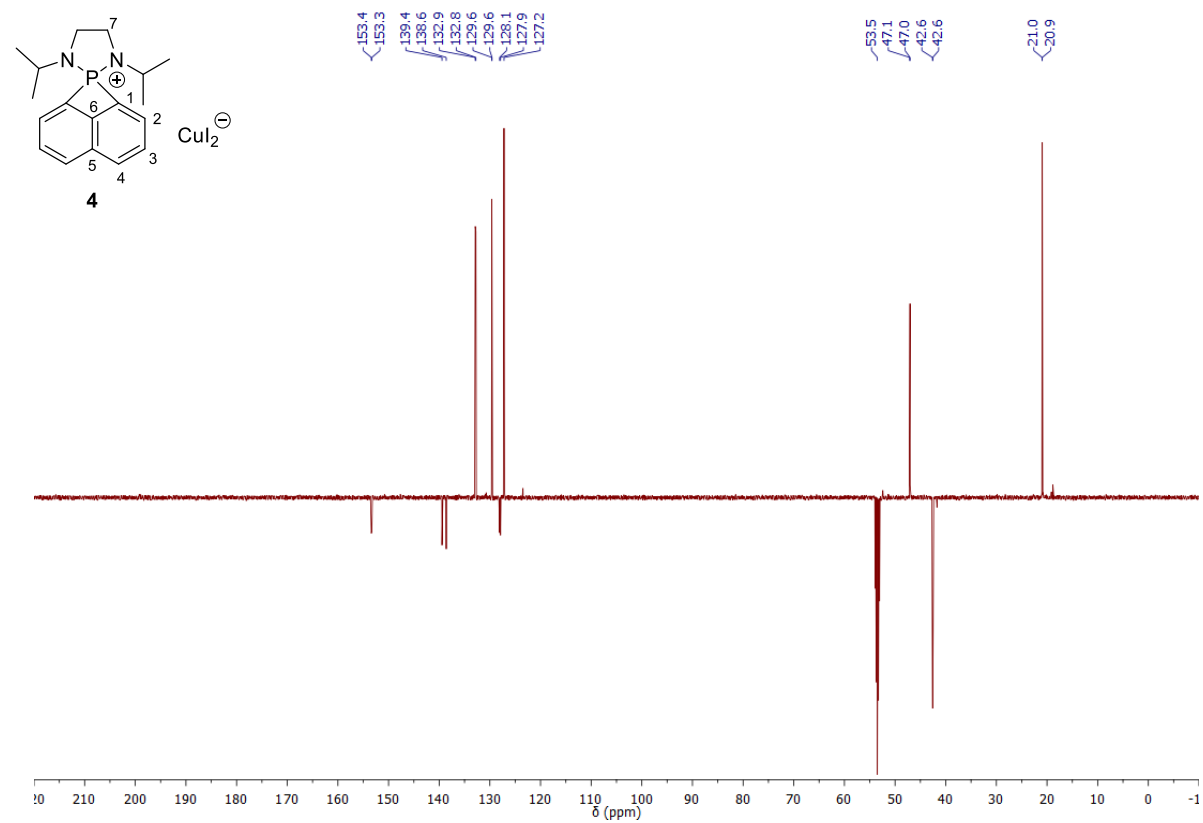

**Figure S2:**  $^{13}\text{C}\{^1\text{H}\}$  NMR spectrum of **4** in  $\text{CD}_2\text{Cl}_2$

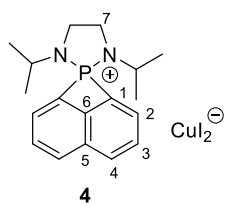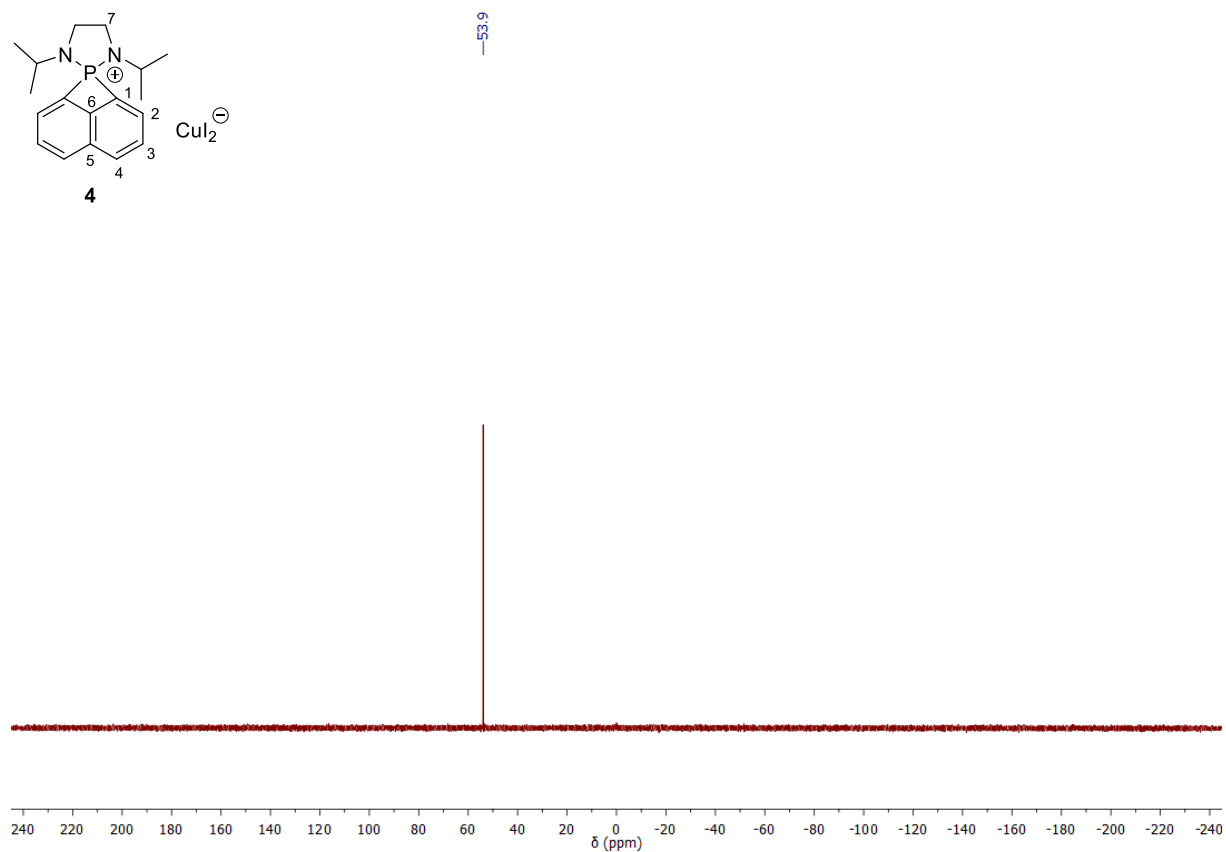

**Figure S3:**  $^{31}\text{P}\{^1\text{H}\}$  NMR spectrum of **4** in  $\text{CD}_2\text{Cl}_2$

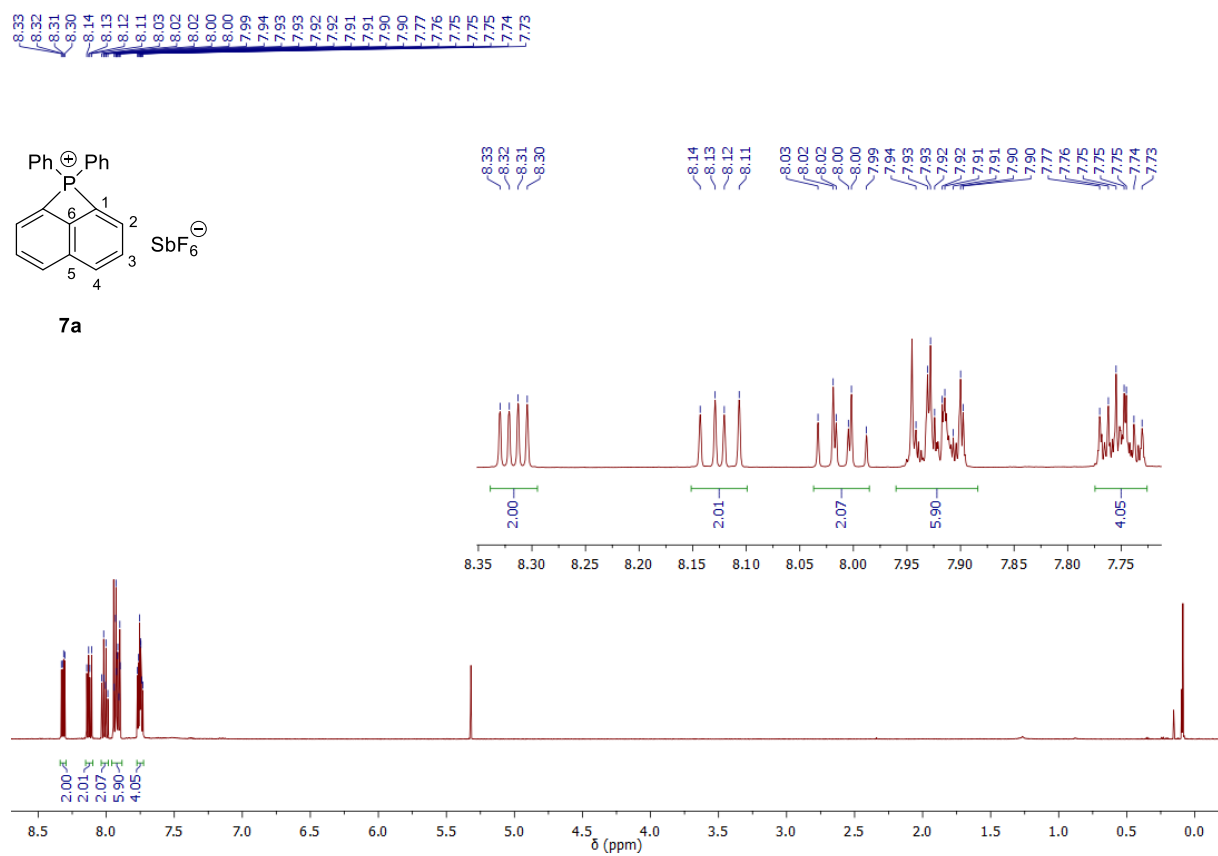

**Figure S4:**  $^1\text{H}$  NMR spectrum of **7a** in  $\text{CD}_2\text{Cl}_2$

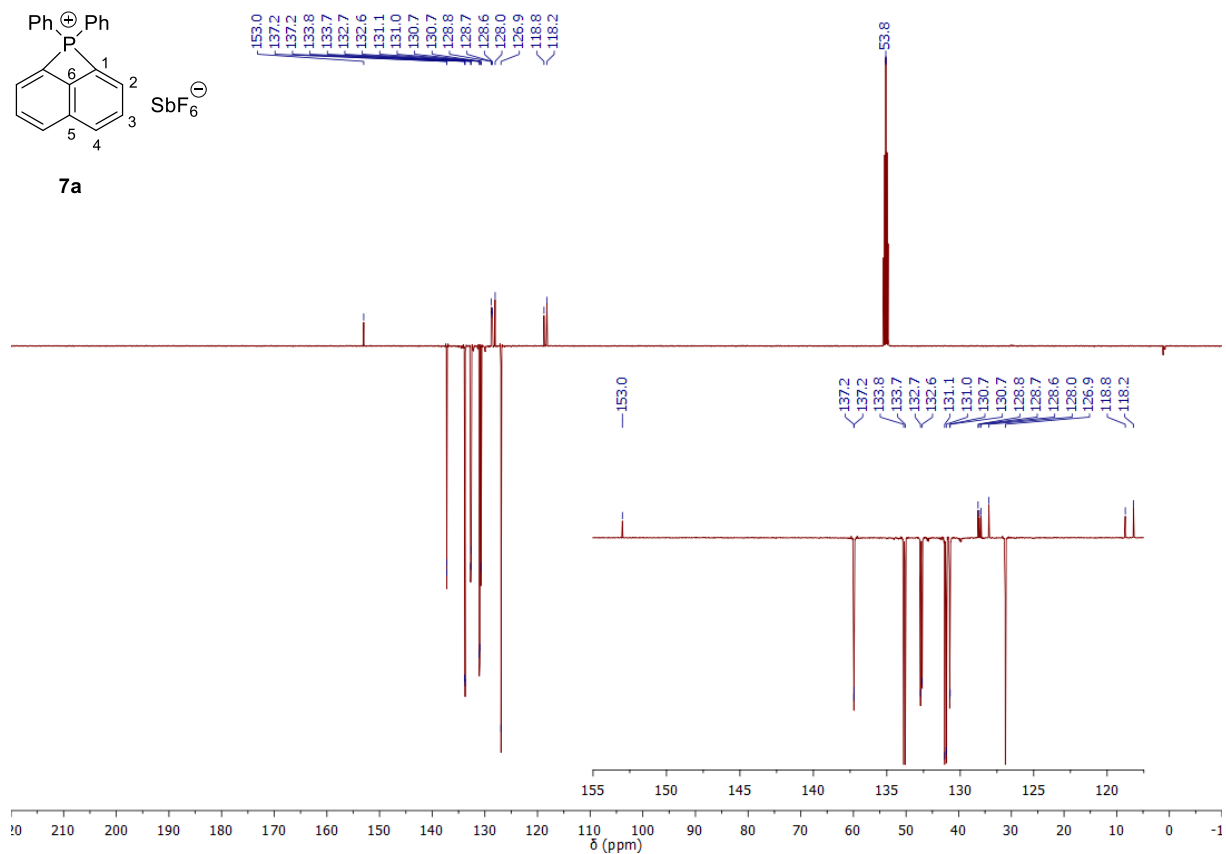

**Figure S5:** <sup>13</sup>C{<sup>1</sup>H} NMR spectrum of **7a** in CD<sub>2</sub>Cl<sub>2</sub>

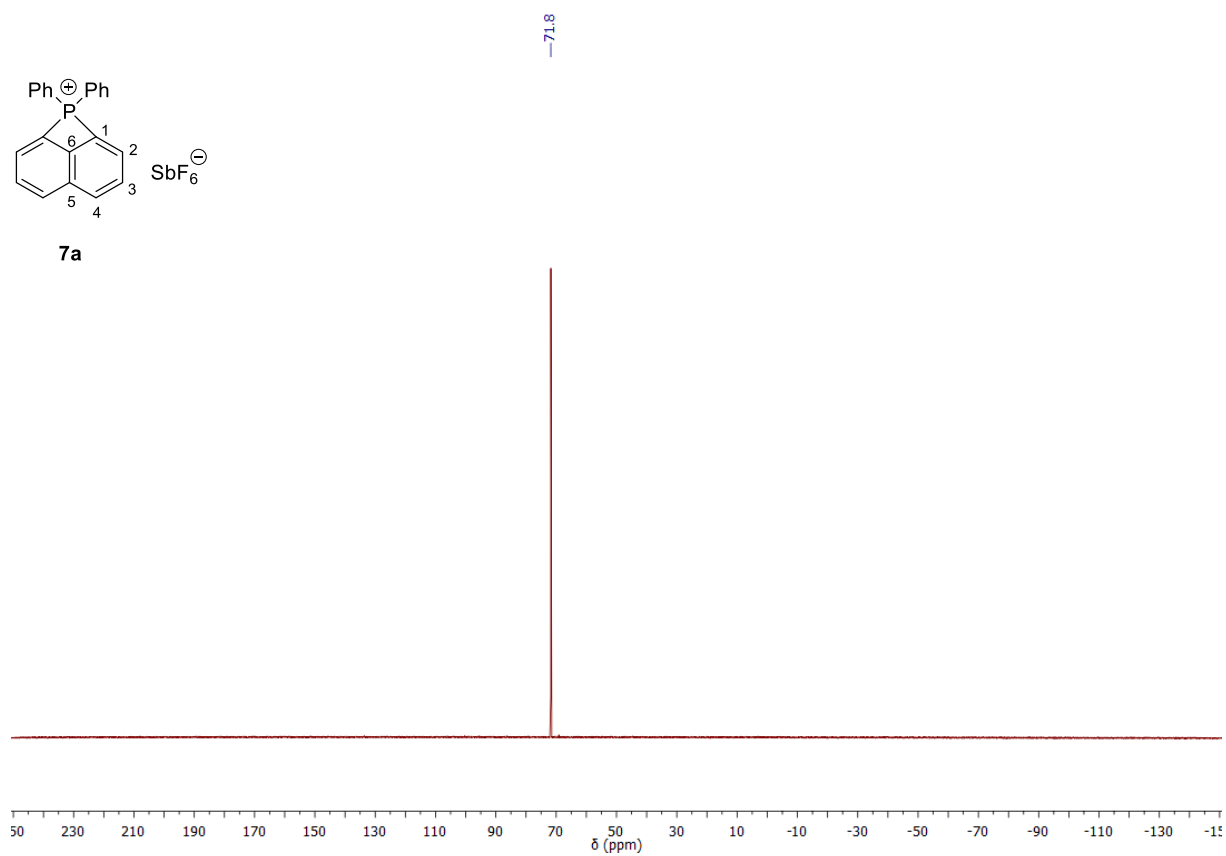

**Figure S6:** <sup>31</sup>P{<sup>1</sup>H} NMR spectrum of **7a** in CD<sub>2</sub>Cl<sub>2</sub>

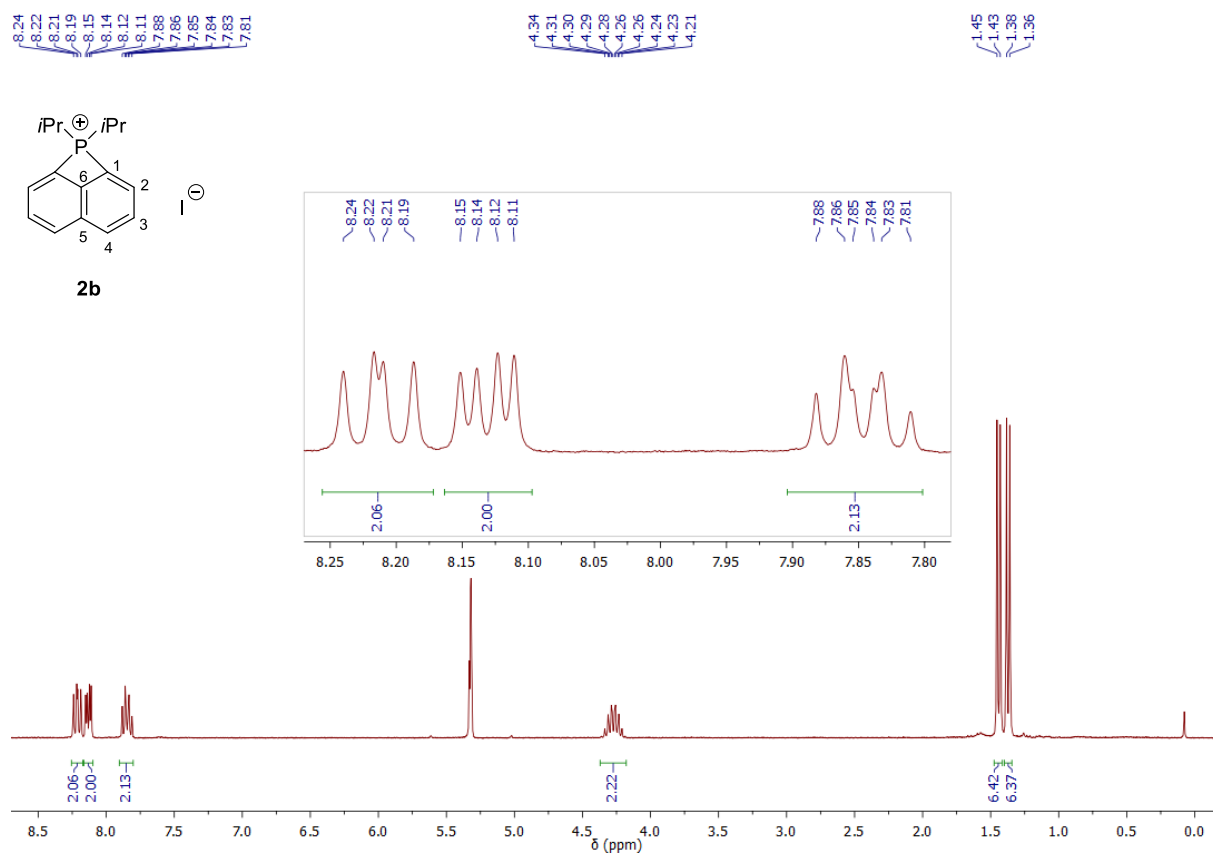

**Figure S7:**  $^1\text{H}$  NMR spectrum of **2b** in  $\text{CD}_2\text{Cl}_2$

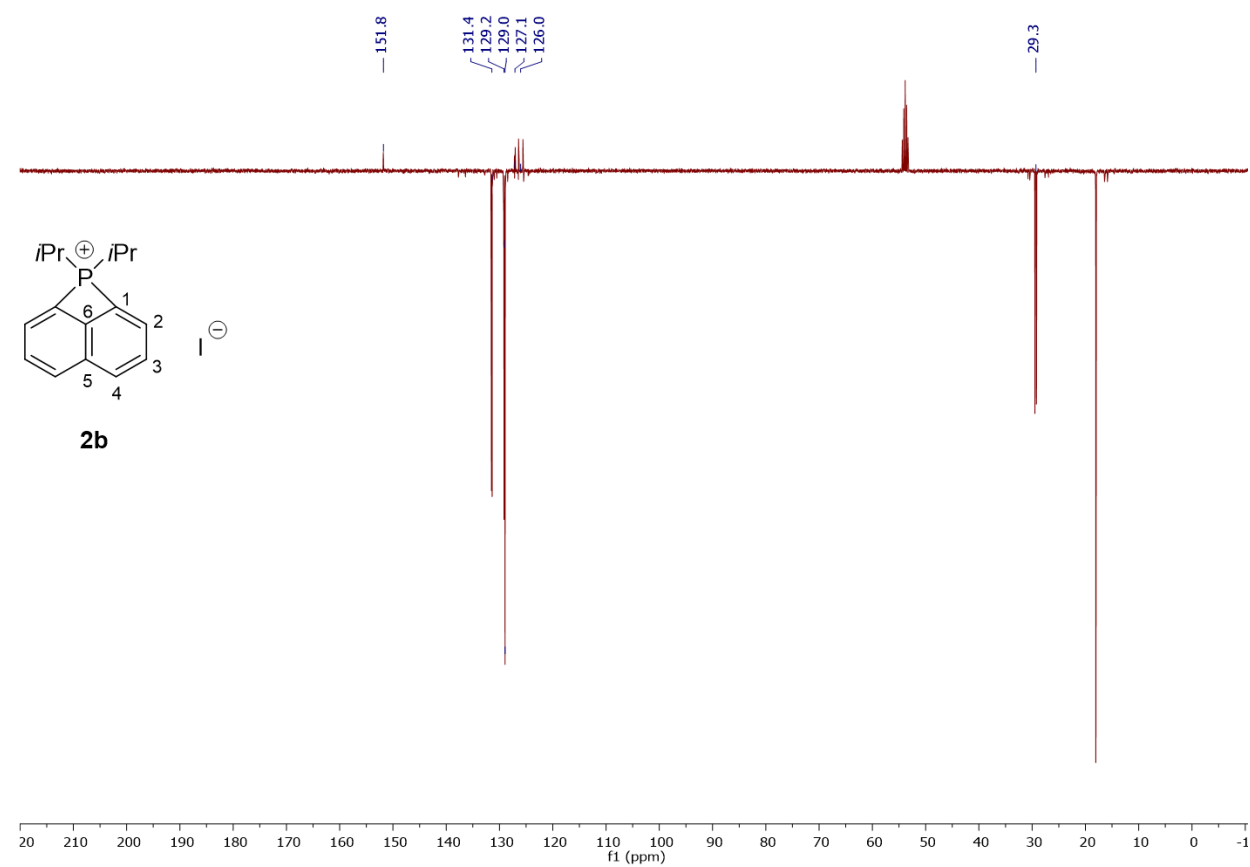

**Figure S8:**  $^{13}\text{C}\{^1\text{H}\}$  NMR spectrum of **2b** in  $\text{CD}_2\text{Cl}_2$

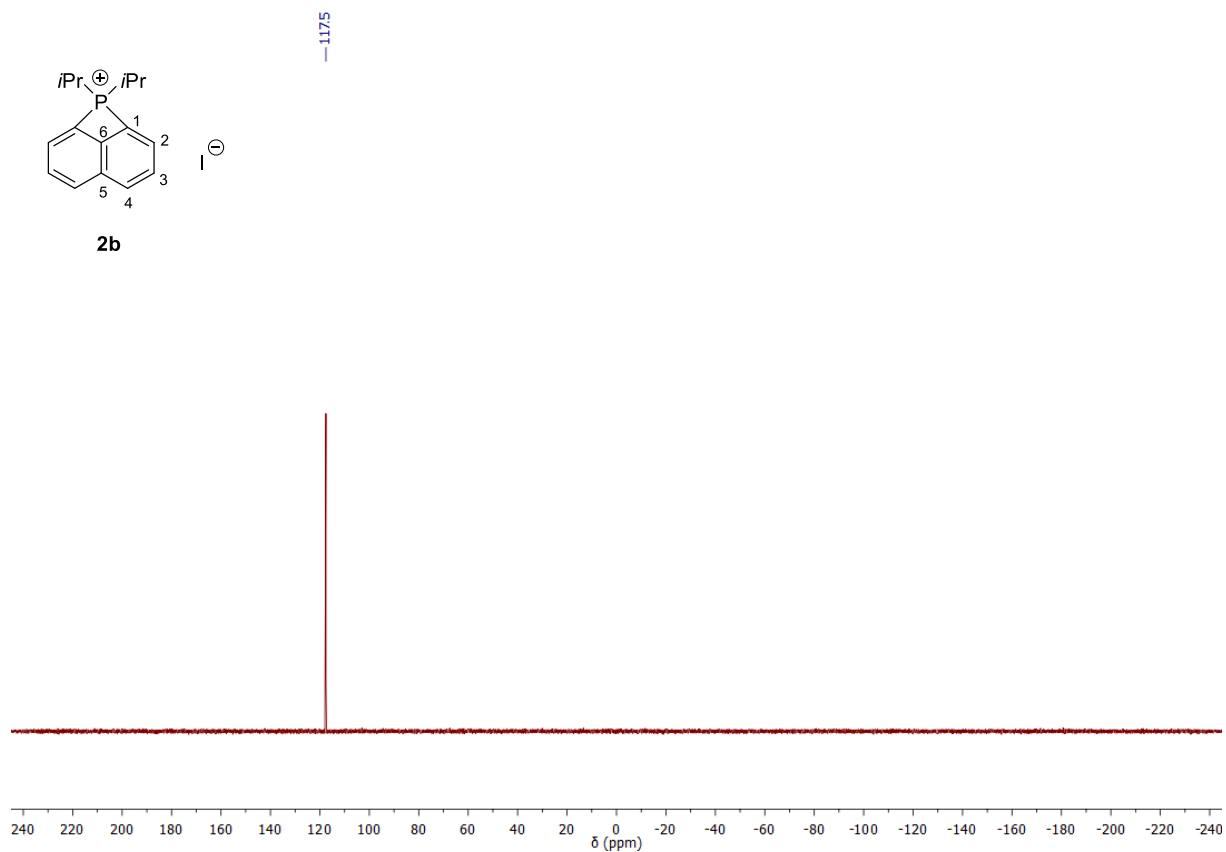

**Figure S9:**  $^{31}\text{P}\{^1\text{H}\}$  NMR spectrum of **2b** in  $\text{CD}_2\text{Cl}_2$

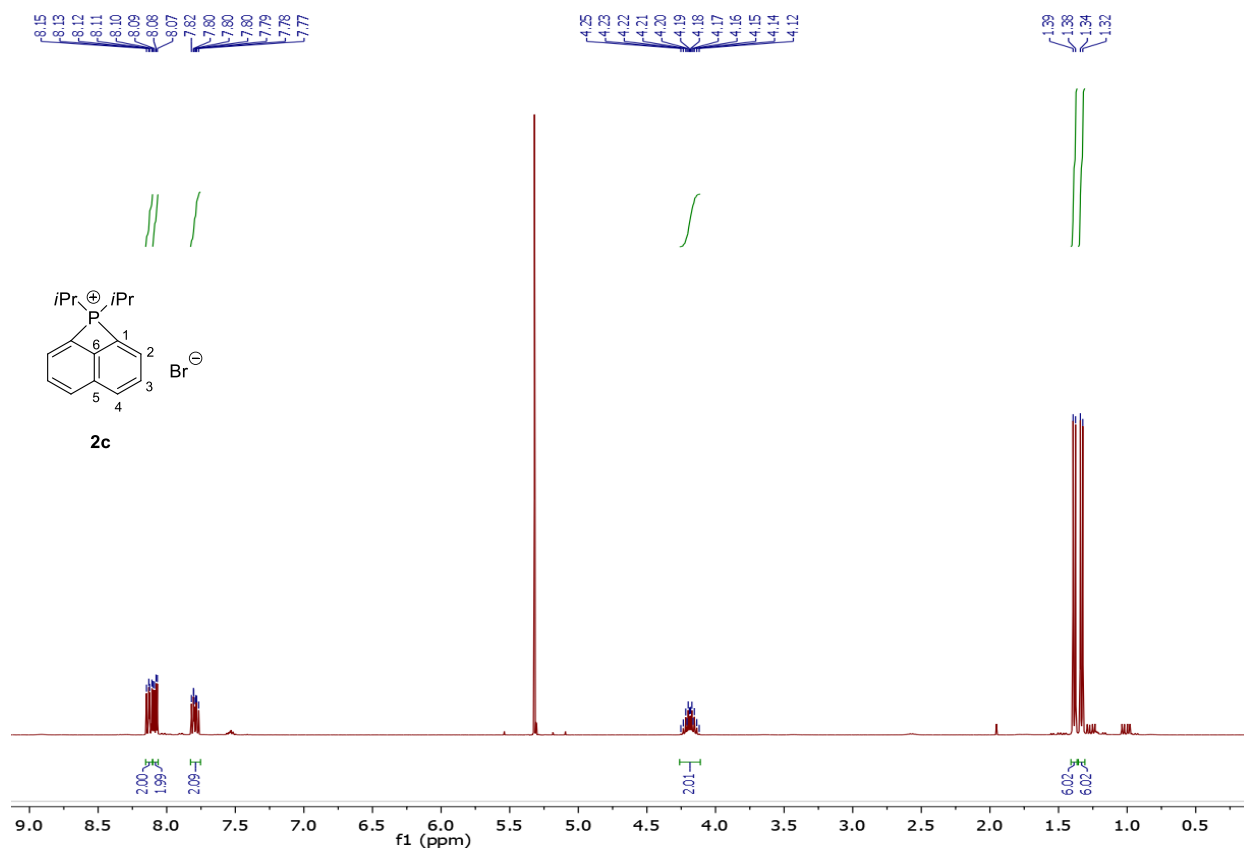

**Figure S10:**  $^1\text{H}$  NMR spectrum of **2c** in  $\text{CD}_2\text{Cl}_2$

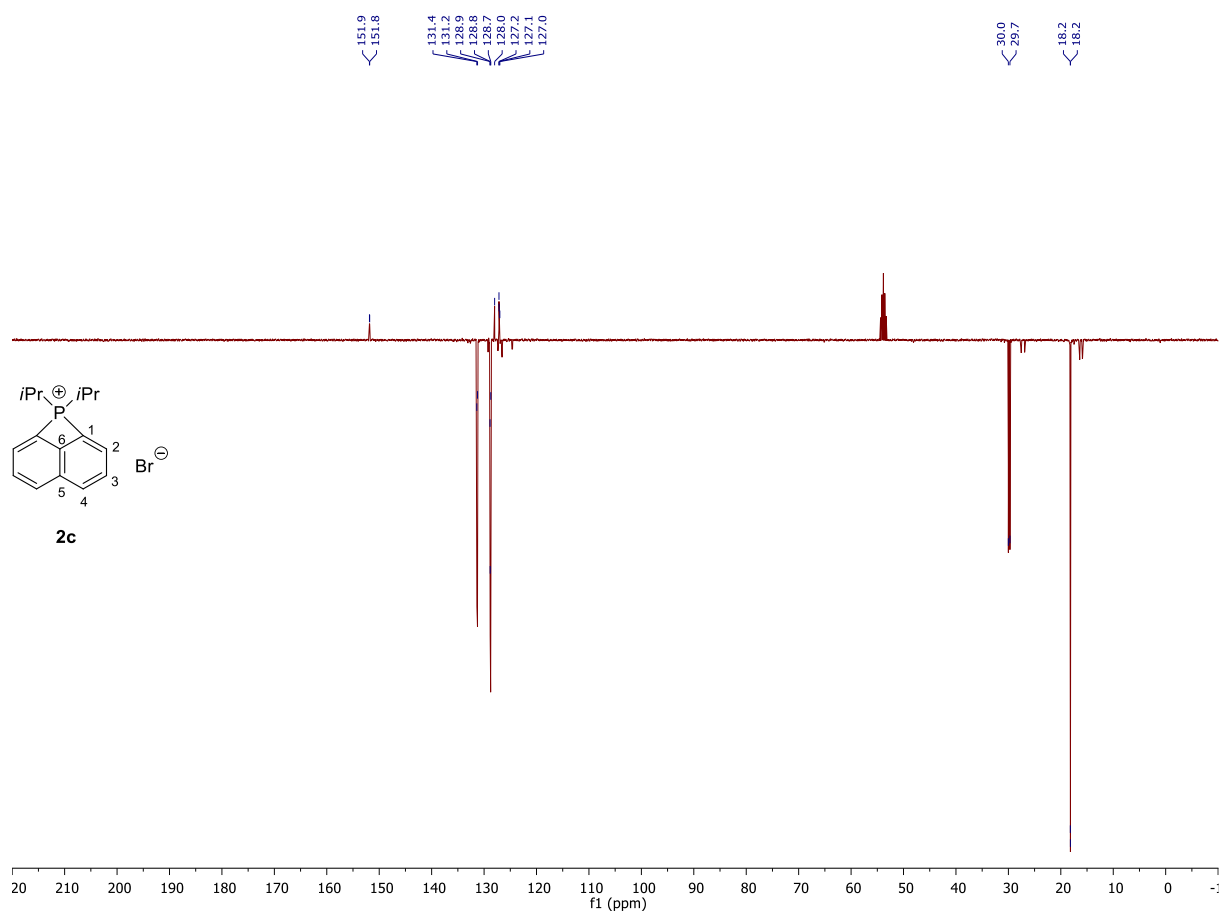

**Figure S11:**  $^{13}C\{^1H\}$  NMR spectrum of **2c** in  $CD_2Cl_2$

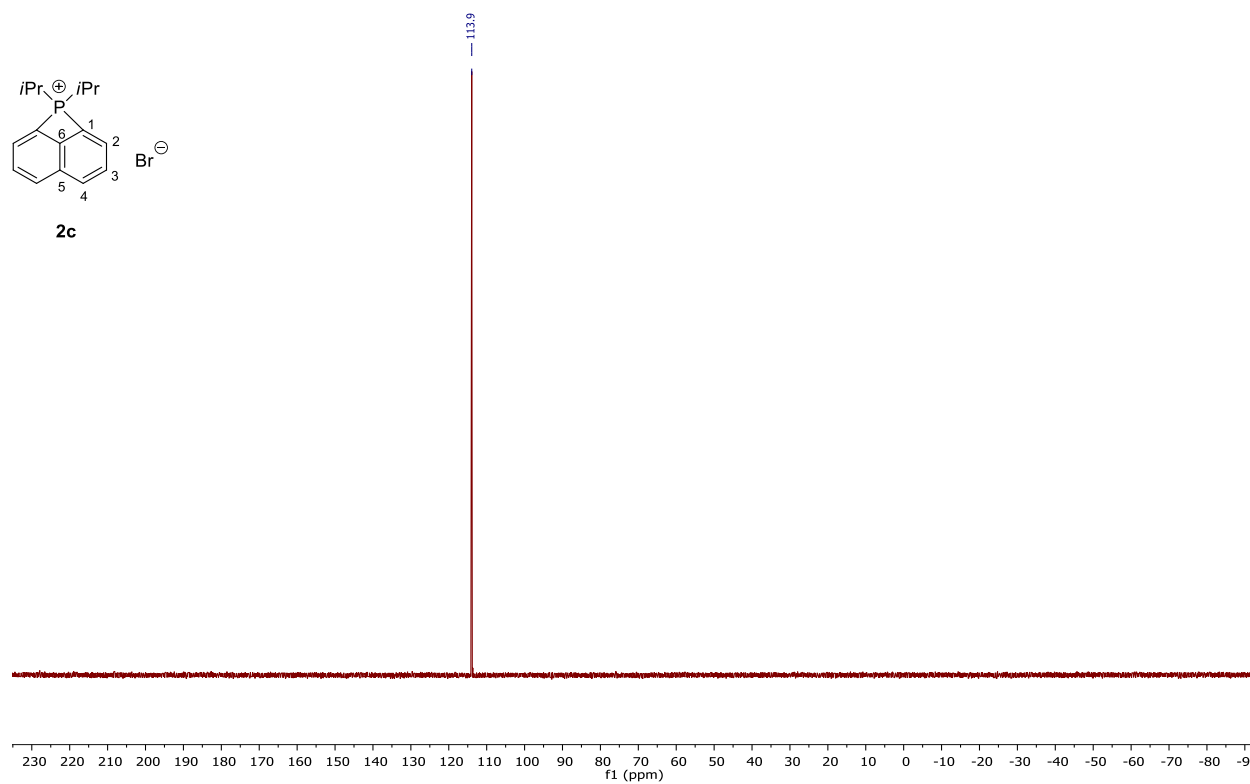

**Figure S12:**  $^{31}P\{^1H\}$  NMR spectrum of **2c** in  $CD_2Cl_2$

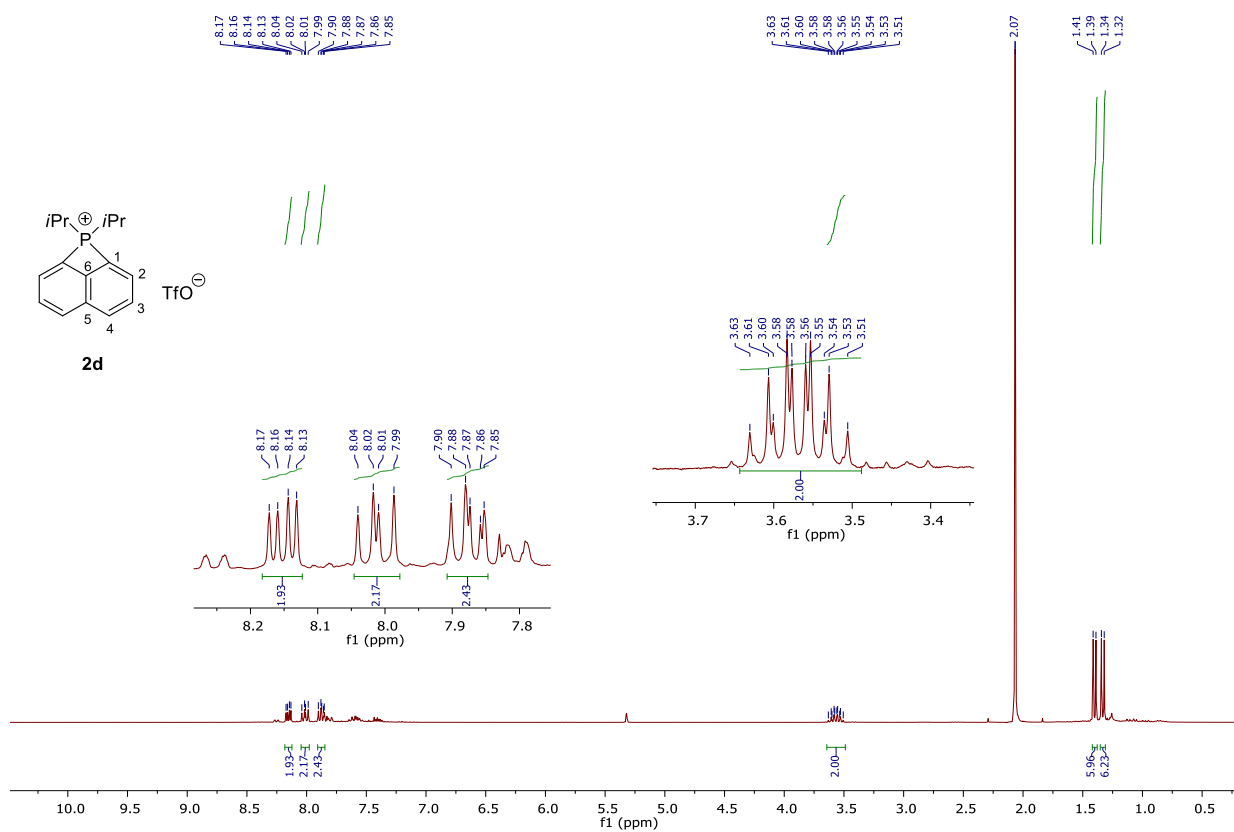

**Figure S13:**  $^1\text{H}$  NMR spectrum of **2d** in  $\text{CD}_2\text{Cl}_2$

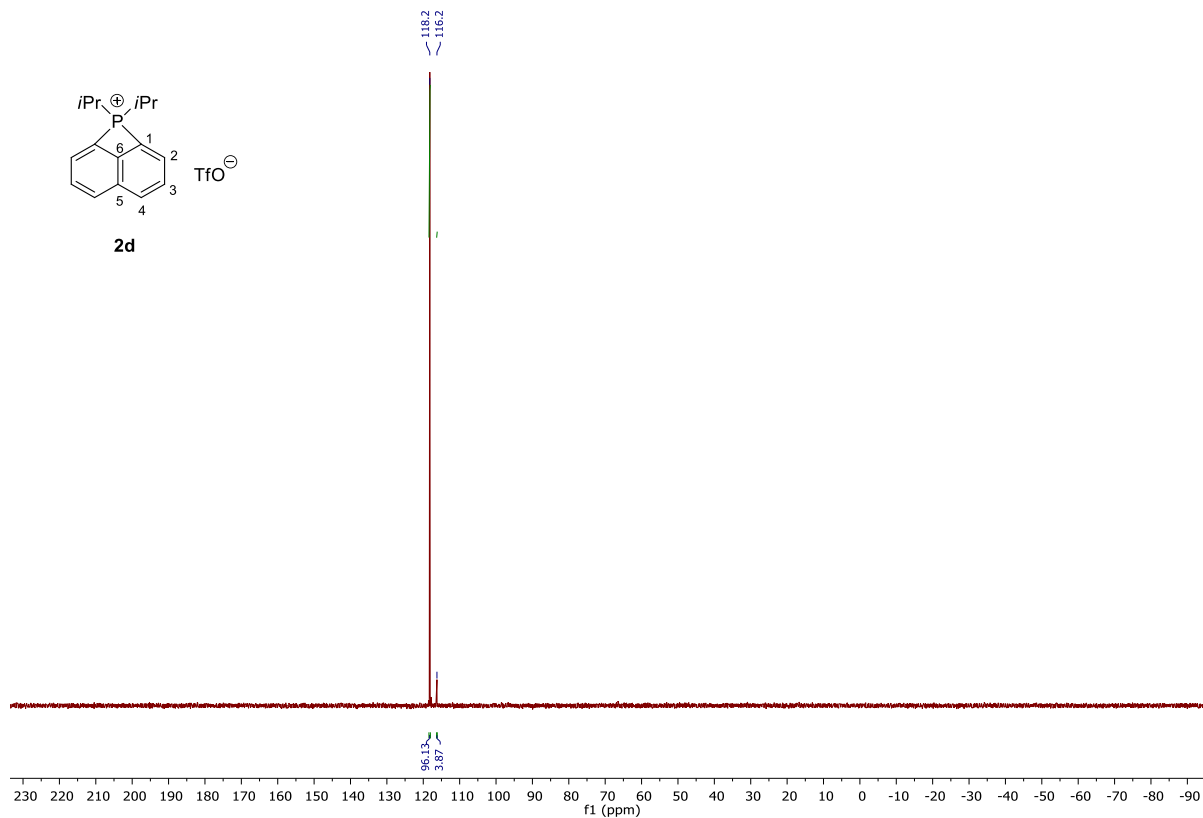

**Figure S14:**  $^{31}\text{P}\{^1\text{H}\}$  NMR spectrum of **2d** in  $\text{CD}_2\text{Cl}_2$



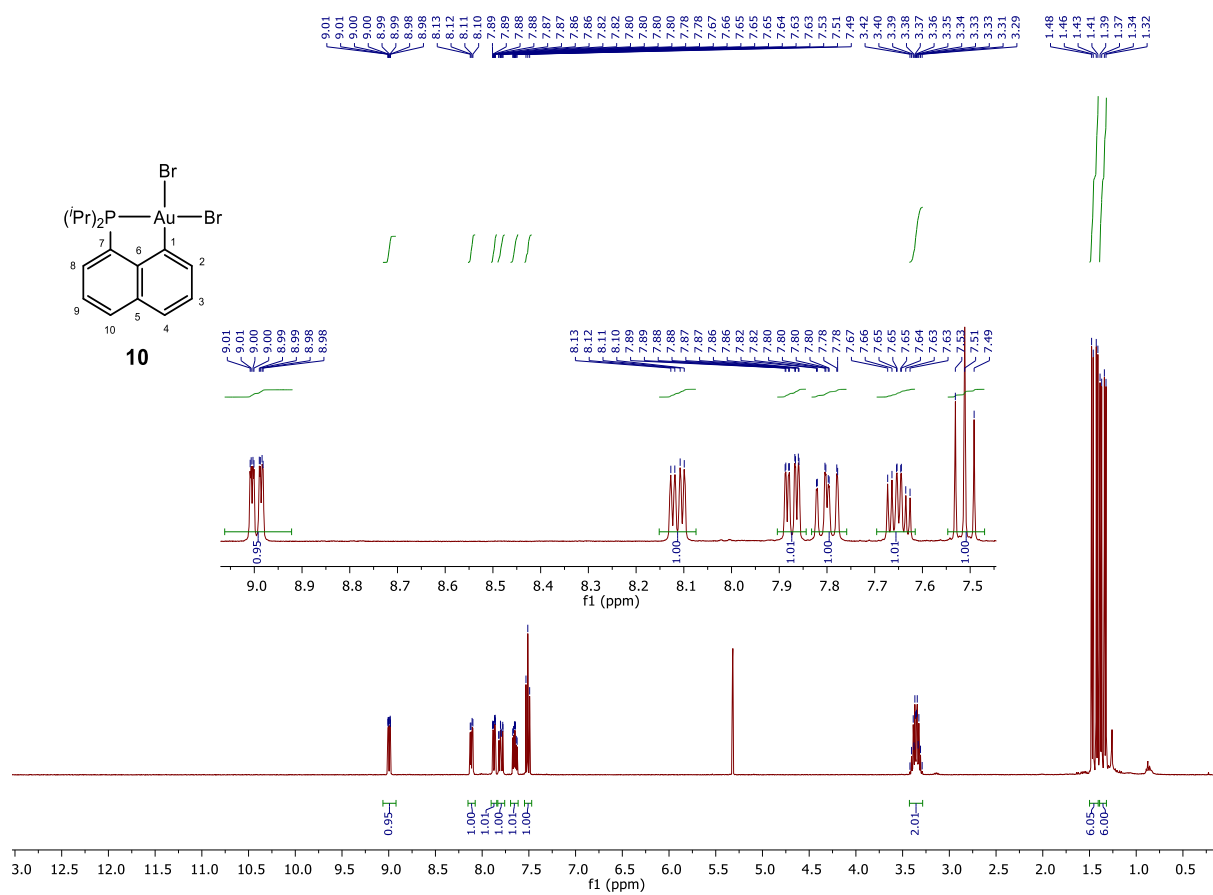

**Figure S15:**  $^1\text{H}$  NMR spectrum of **10** in  $\text{CD}_2\text{Cl}_2$

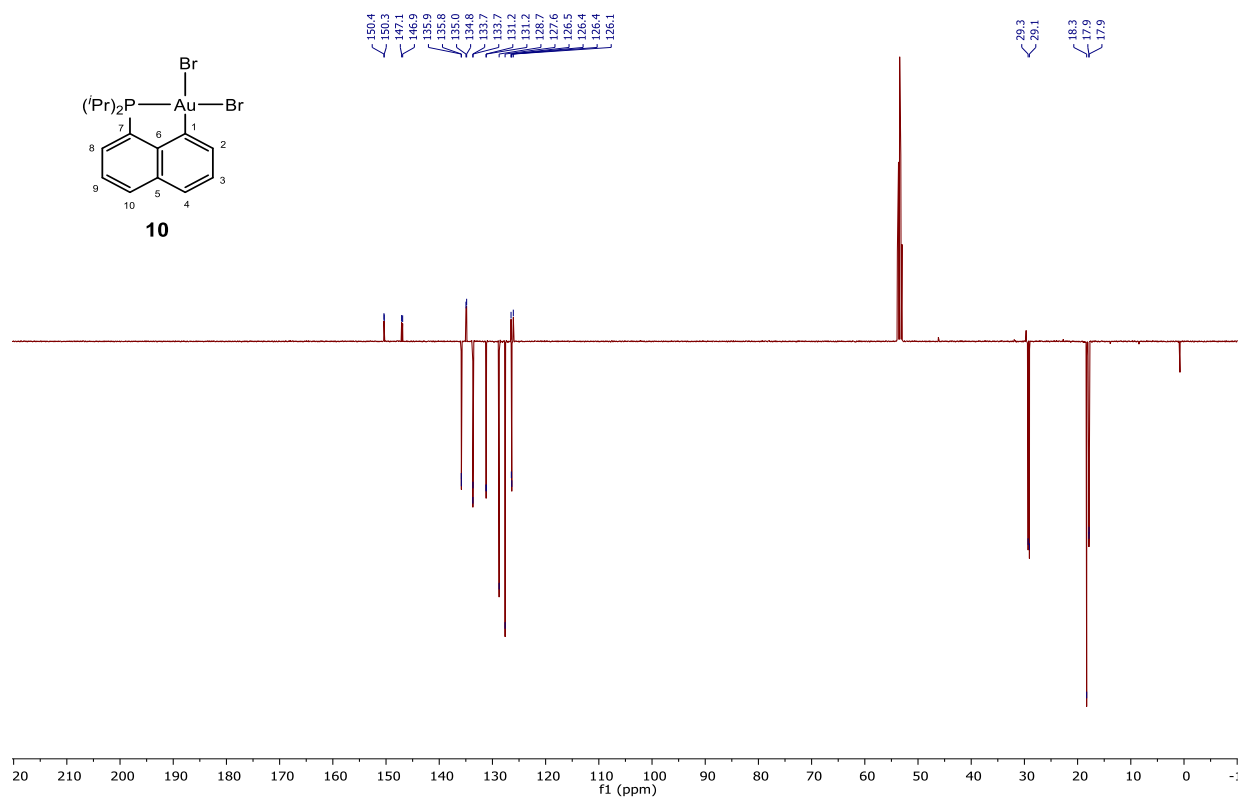

**Figure S16:**  $^{13}\text{C}\{^1\text{H}\}$  NMR spectrum of **10** in  $\text{CD}_2\text{Cl}_2$

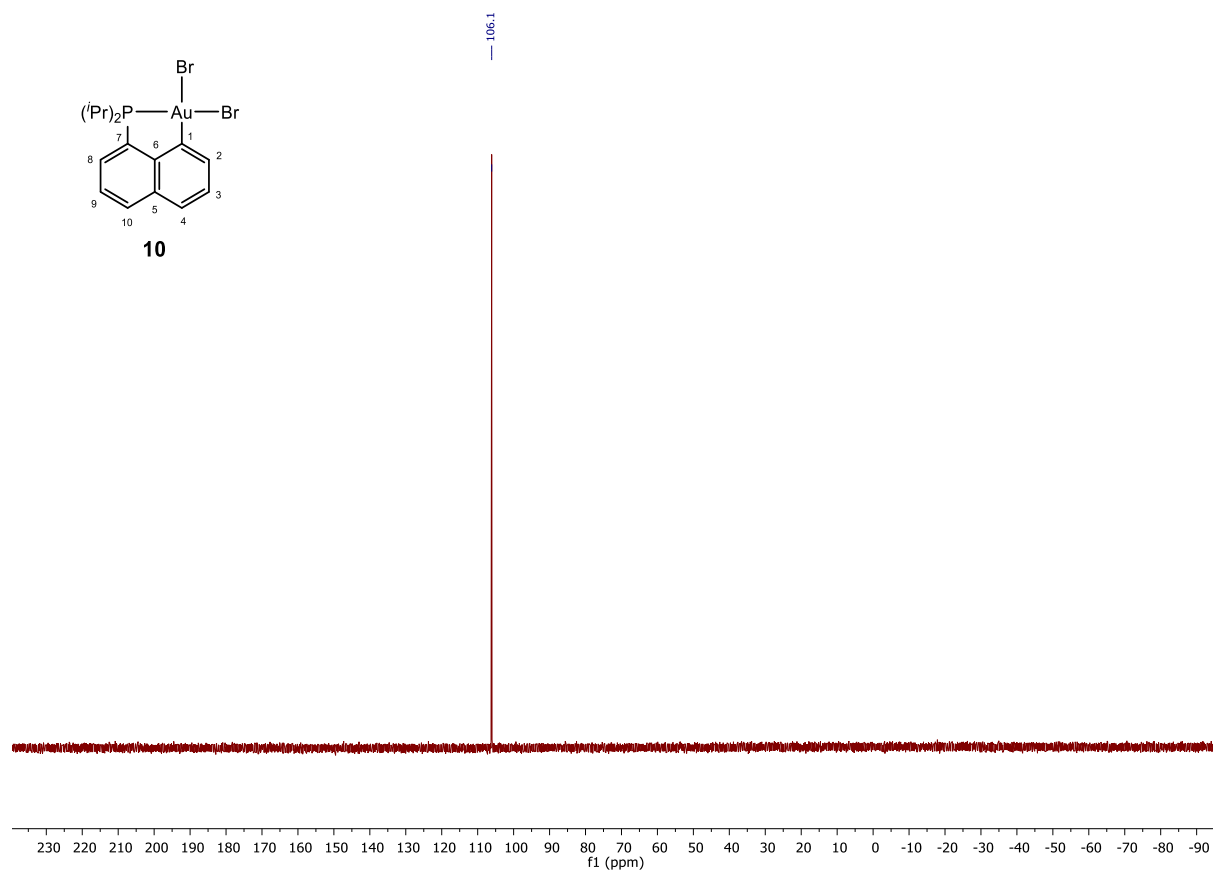

**Figure S17:**  $^{31}\text{P}\{^1\text{H}\}$  NMR spectrum of **10** in  $\text{CD}_2\text{Cl}_2$

## 6. Computational details

All calculations were performed on the real systems using the Gaussian 09 package and the B3PW91 hybrid<sup>[11]</sup> functional, which afforded very accurate results for the reaction of **1** with gold.<sup>[4]</sup> When dispersion effects were included [B3PW91-D3(BJ), optimization and single-point calculations], only small variations were noticed (Table S6). Solvent effects (dichloromethane, DCM and acetonitrile, CH<sub>3</sub>CN) were taken into account by means of the universal Solvation Model based on solute electron Density (SMD).<sup>[12]</sup> The copper and gold atoms were described with the relativistic electron core potential SDD and associated basis set,<sup>[13]</sup> augmented by a set of f-orbital polarization functions.<sup>[14]</sup> The halogen atoms (I, Br, Cl) were also described with the relativistic electron core potential SDD and associated basis set.<sup>[18]</sup> The 6-31G\*\* basis set were employed for all other atoms (C, H, P). All stationary points involved were fully optimized in gas phase or solvent. Frequency calculations were undertaken to confirm the nature of the stationary points, yielding one imaginary frequency for transition states (TS), corresponding to the expected process, and all of them positive for *minima*. The connectivity of the transition states and their adjacent *minima* was confirmed by intrinsic reaction coordinate (IRC) calculations.<sup>[15]</sup> In order to have better insight on the bonding situation in compound **6a**, Natural Bond Orbital<sup>[16]</sup> calculations (NBO, 5.9 version)<sup>[17]</sup> were carried out. All structures have been plotted with Chemcraft software.<sup>[18]</sup>

**Table S6.** Reaction **1-I + CuI** in gas phase computed with and without dispersion effects, at B3PW91 and B3PW91-D3(BJ) level of theory. Activation barriers ( $\Delta G^\ddagger$ ) and thermodynamic ( $\Delta G$ ) of C-I oxidative addition and P-C reductive elimination steps in kcal/mol.

|                                          | C-I Oxidative addition |            | P-C Reductive elimination |            |
|------------------------------------------|------------------------|------------|---------------------------|------------|
|                                          | $\Delta G^\ddagger$    | $\Delta G$ | $\Delta G^\ddagger$       | $\Delta G$ |
| <b>B3PW91<sup>a</sup></b>                | 9.3                    | 2.7        | 18.5                      | -1.9       |
| <b>B3PW91-D3(BJ)<sup>b</sup></b>         | 8.8                    | 1.5        | 15.6                      | 3.8        |
| <b>B3PW91-D3(BJ)//B3PW91<sup>c</sup></b> | 8.0                    | 0.4        | 16.3                      | 5.9        |

<sup>a</sup> optimization at B3PW91/SDD+f(Cu),SDD(I),6-31G\*\*(other atoms) level; <sup>b</sup> optimization with dispersion effects at B3PW91-D3(BJ)/SDD+f(Cu),SDD(I),6-31G\*\*(other atoms) level <sup>c</sup> dispersion effects have been taken into account by single point calculations at B3PW91-D3(BJ)/SDD+f(Cu), SDD(I), 6-31G\*\*(other atoms) level on the geometry optimized at B3PW91.

**Table S7.** Main geometrical parameters for complex **6a** (distances in Å and bond/dihedral angles in °), optimized in gas phase at B3PW91/SDD+f(Cu), SDD(I), 6-31G\*\* (other atoms) level of theory. Same numbering than in the X-ray structure.

| Theory       | Complex 6a   |
|--------------|--------------|
| P1-Cu        | 2.310        |
| P2-Cu        | 2.321        |
| Cu...I3      | 2.619        |
| Cu...I1      | 3.178        |
| Cu...I2      | 3.267        |
| C3-I1        | 2.138        |
| C25-I2       | 2.135        |
| P1-C1        | 1.871        |
| P2-C23       | 1.876        |
| P1-Cu-P2     | 130.45       |
| P1-Cu-I3     | 108.90       |
| P2-Cu-I3     | 120.53       |
| I1...Cu...I2 | 172.48       |
| I...C-C-P    | -27.5 (23.6) |

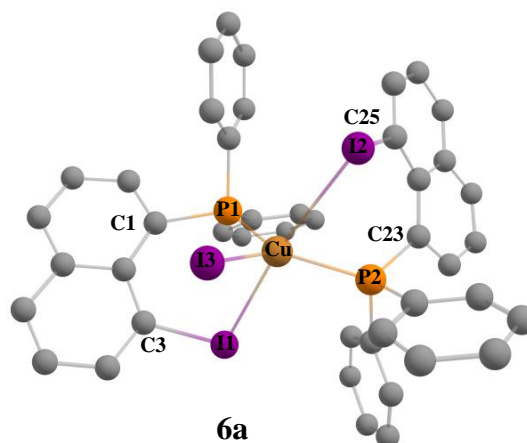

**Table S8.** NBO analysis for complex **6a** at B3PW91/SDD+f(Cu), SDD(I), 6-31G\*\* (other atoms) level of theory. Stabilizing interactions I→Cu and P→Cu,  $\Delta E(2)$  in kcal/mol, found at the second order perturbation theory. Natural Localized Molecular Orbital (NLMO) associated to the iodine lone pair involved in the interaction with copper, with percentage of main atoms (%) accounting for the I→Cu interaction and hybridization of the atoms.

| NBO analysis : 2 <sup>nd</sup> order perturbation theory |                                                                                                                                                        |
|----------------------------------------------------------|--------------------------------------------------------------------------------------------------------------------------------------------------------|
| LP(P1) → 4s(Cu)                                          | $\Delta E(2) = 85.24$                                                                                                                                  |
| LP(P2) → 4s(Cu)                                          | $\Delta E(2) = 87.21$                                                                                                                                  |
| LP(I1) → 4s(Cu)                                          | $\Delta E(2) = 12.73$ // Cu-I at 3.178 Å                                                                                                               |
| LP(I2) → 4s(Cu)                                          | $\Delta E(2) = 10.02$ // Cu-I at 3.267 Å                                                                                                               |
| LP(I3) → 4s(Cu)                                          | $\Delta E(2) = 77.25$ // Cu-I at 2.619 Å                                                                                                               |
| NLMO analysis                                            |                                                                                                                                                        |
| LP(I1) // Cu-I at 3.178 Å                                | % I : 95.4 [s (4.85%), p (95.15%)]<br>% Cu : 1.0 [s (90.58%), p (8.27%)]<br>% P1 : 0.9 [s (10.04%), p (87.63%)]<br>% P2 : 0.2 [s (25.71%), p (73.10%)] |
| LP(I2) // Cu-I at 3.267 Å                                | % I : 95.4 [s (3.43%), p (96.57%)]<br>% Cu : 0.8 [s (90.33%), p (8.20%)]<br>% P1 : 0.1 [s (24.27%), p (74.75%)]<br>% P2 : 1.0 [s (8.25%), p (89.17%)]  |
| LP(I3) // Cu-I at 2.619 Å                                | % I : 86.4 [s (15.48%), p (84.52%)]<br>% Cu : 11.1 [s (94.14%), p (5.07%)]<br>% P1 : 0.8 [s (4.03%), p (93.63%)]<br>% P2 : 0.7 [s (3.86%), p (94.26%)] |

**Figure S18.** Energy profiles computed in gas phase and in DCM/CH<sub>3</sub>CN solutions for the C–I oxidative addition / P–C reductive elimination sequence. Free energies (and electronic energies in brackets) in kcal/mol. Profiles computed at B3PW91/SDD+f(Cu),SDD(I),6-31G\*\*(other atoms) level of theory in gas phase and at SMD(DCM or CH<sub>3</sub>CN)-B3PW91/SDD+f(Cu), SDD(I),6-31G\*\*(other atoms) level of theory in solution.

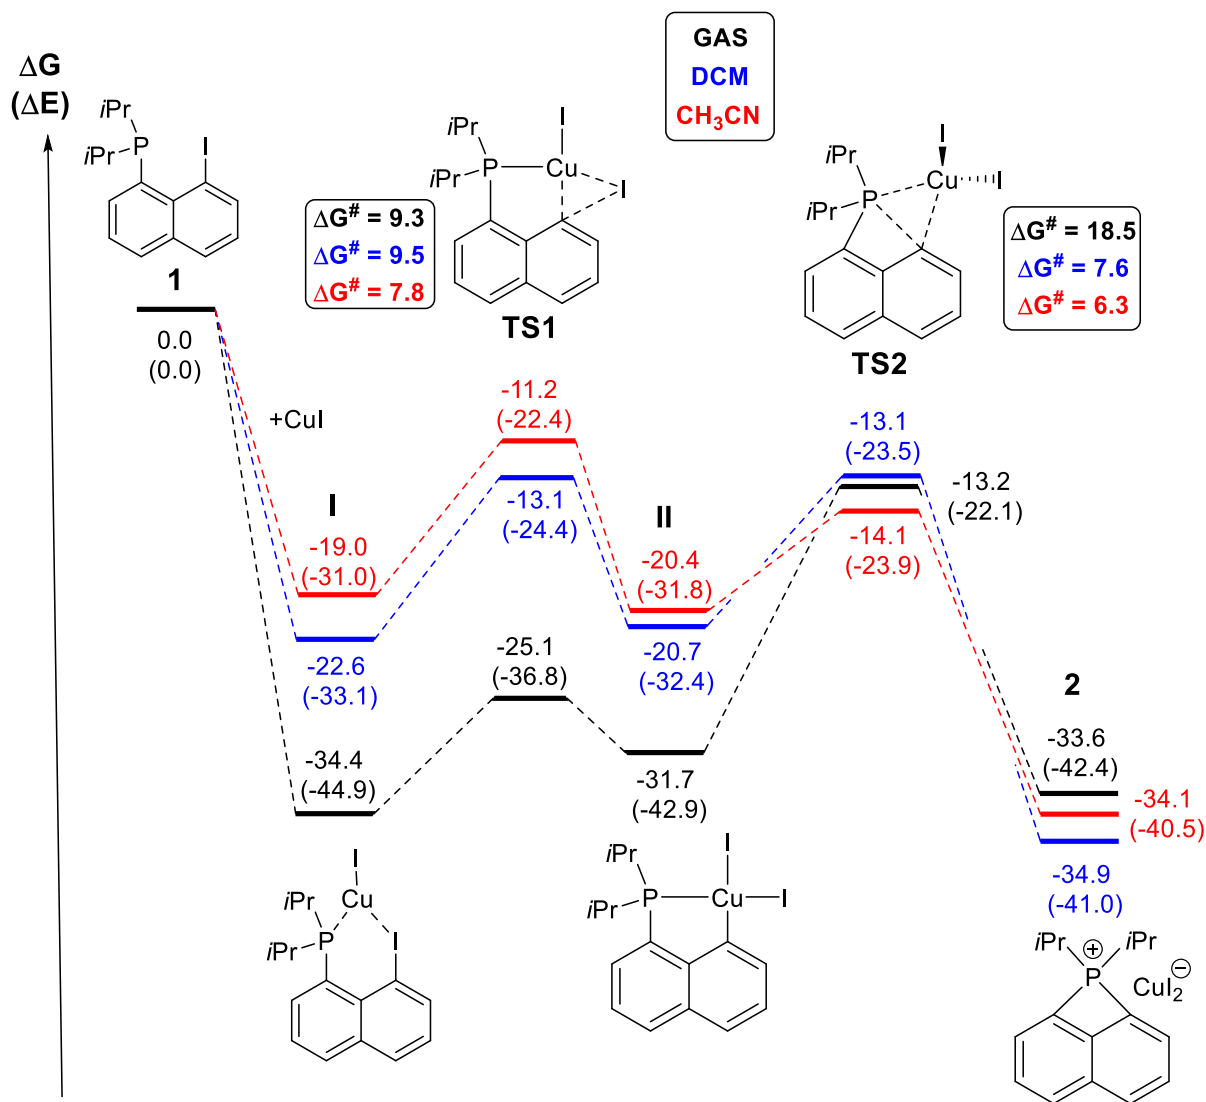

**Figure S19.** Reactions **1-I** + CuI in gas phase, CH<sub>2</sub>Cl<sub>2</sub> (DCM) and CH<sub>3</sub>CN. Main geometrical parameters for **TS1**, **TS2** and complexes **I**, **II**, **2** (distances in Å and bond angles in °) optimized in gas phase or in solvent at SMD(solvent)-B3PW91/SDD+f(Cu), I(SDD), 6-31G\*\* (other atoms) level of theory.

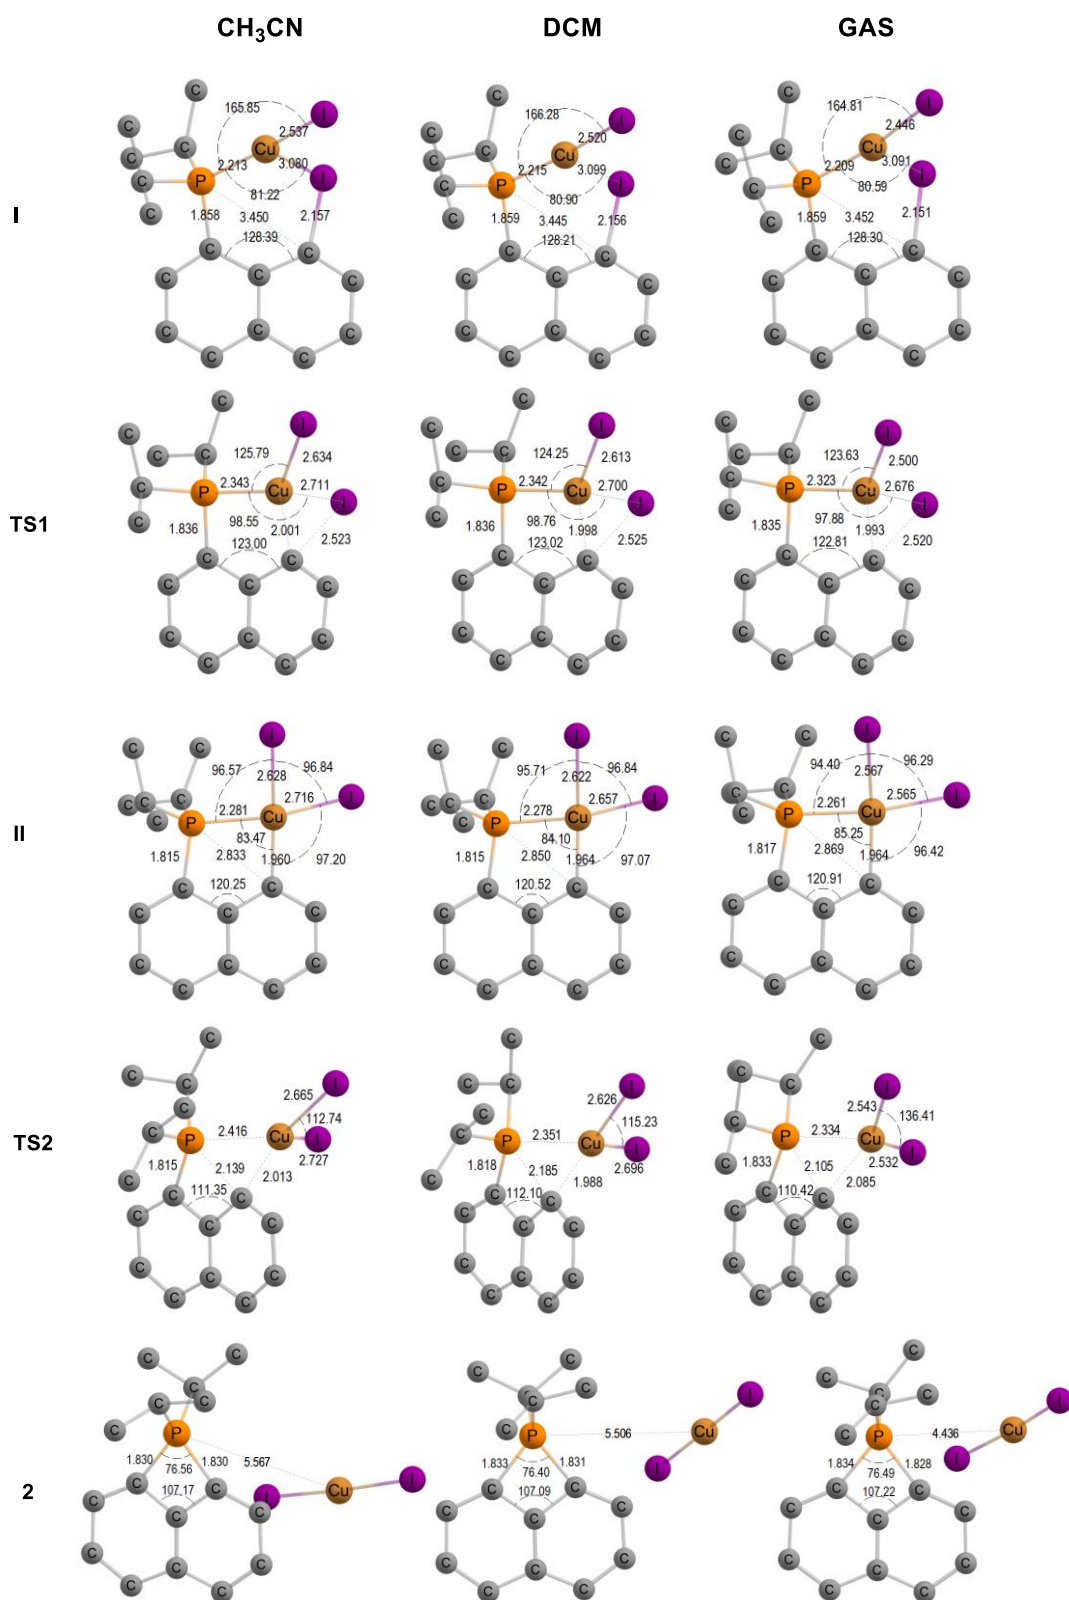

**Figure S20.** Energy profiles computed for the C–X oxidative addition (X : I, Br, Cl) / P–C reductive elimination sequence at the SMD(CH<sub>3</sub>CN)-B3PW91/SDD+f(Cu), SDD(I,Br,Cl),6-31G\*\*(other atoms) level of theory. Free energies (and electronic energies in brackets) in kcal/mol.

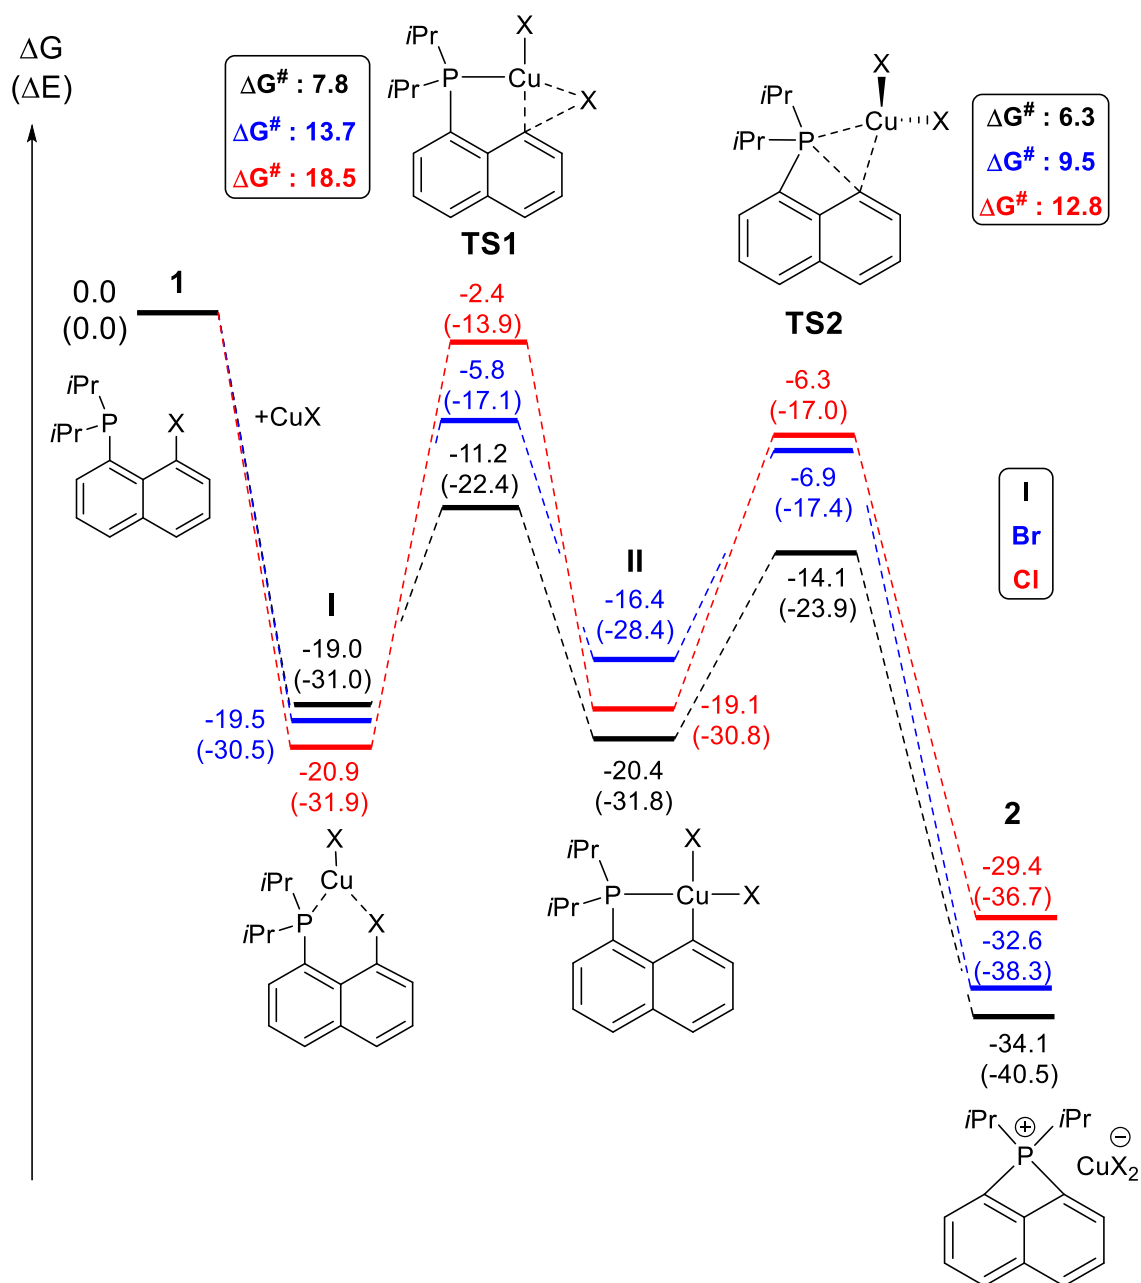

**Figure S21.** Reactions **1-Br** + CuBr in gas phase, DCM and CH<sub>3</sub>CN. Main geometrical parameters for **TS1**, **TS2** and complexes **I**, **II**, **2** (distances in Å and bond angles in °) optimized in gas phase or solvent at SMD(solvent)-B3PW91/SDD+f(Cu), Br(SDD), 6-31G\*\* (other atoms) level of theory.

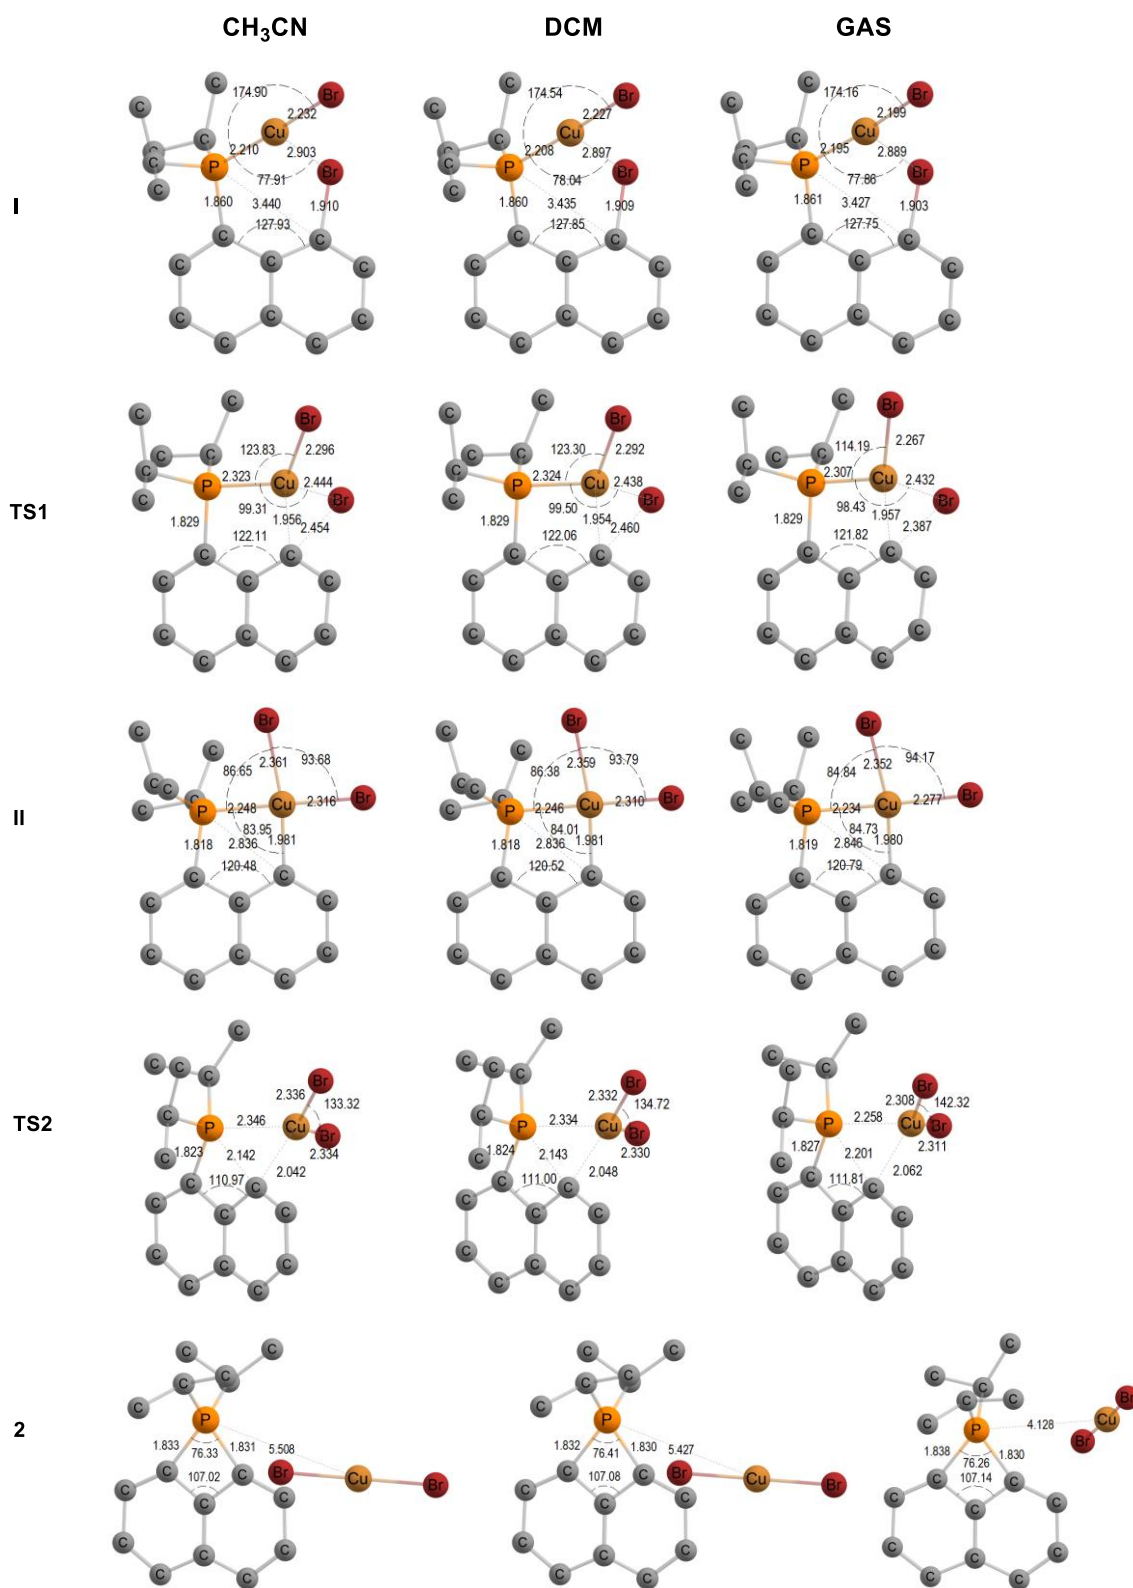



**Figure S22.** Reactions **1-Cl** + CuCl in gas phase, DCM and CH<sub>3</sub>CN. Main geometrical parameters for **TS1**, **TS2** and complexes **I**, **II**, **2** (distances in Å and bond angles in °) optimized in gas phase or solvent at SMD(solvent)-B3PW91/SDD+f(Cu), Cl(SDD), 6-31G\*\* (other atoms) level of theory.

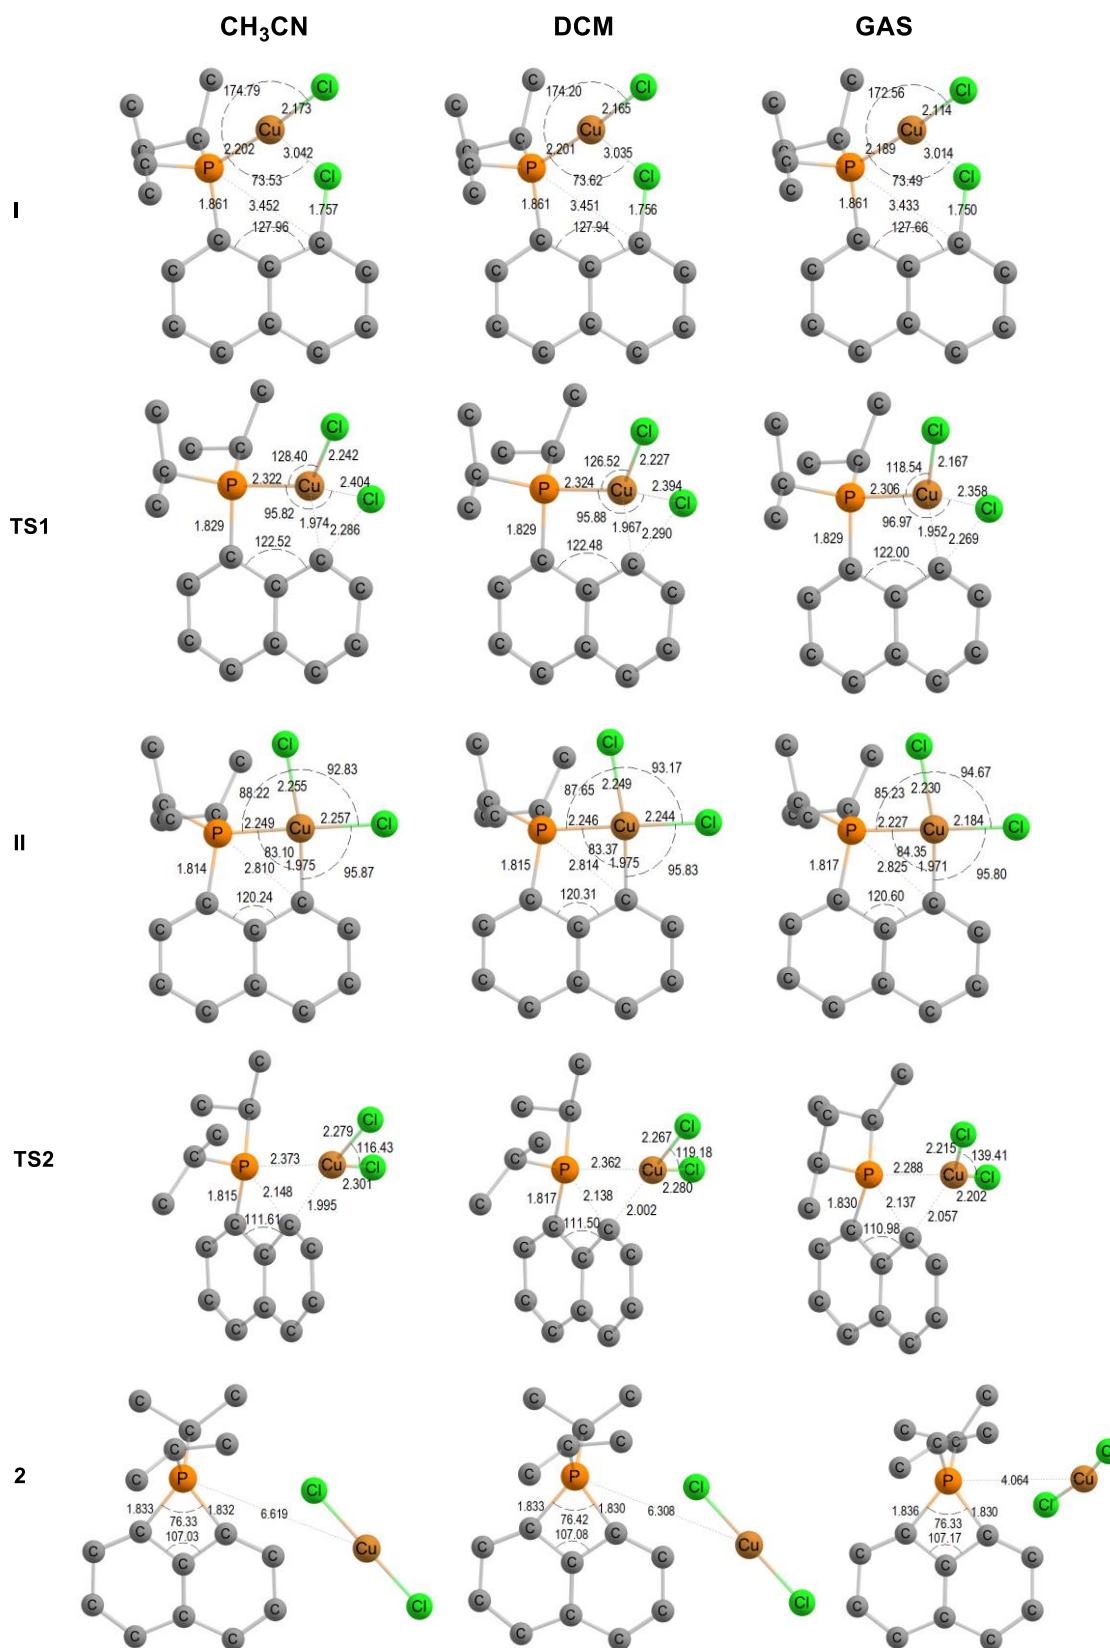

**Figure S23.** Energy profiles computed for the reactions of the *peri*-iodo naphthyl phosphine **1-I** with CuI and AuI at the SMD(DCM)-B3PW91/SDD+f(M),SDD(I),6-31G\*\*(other atoms) level of theory. Free energies (and electronic energies in brackets) in kcal/mol.

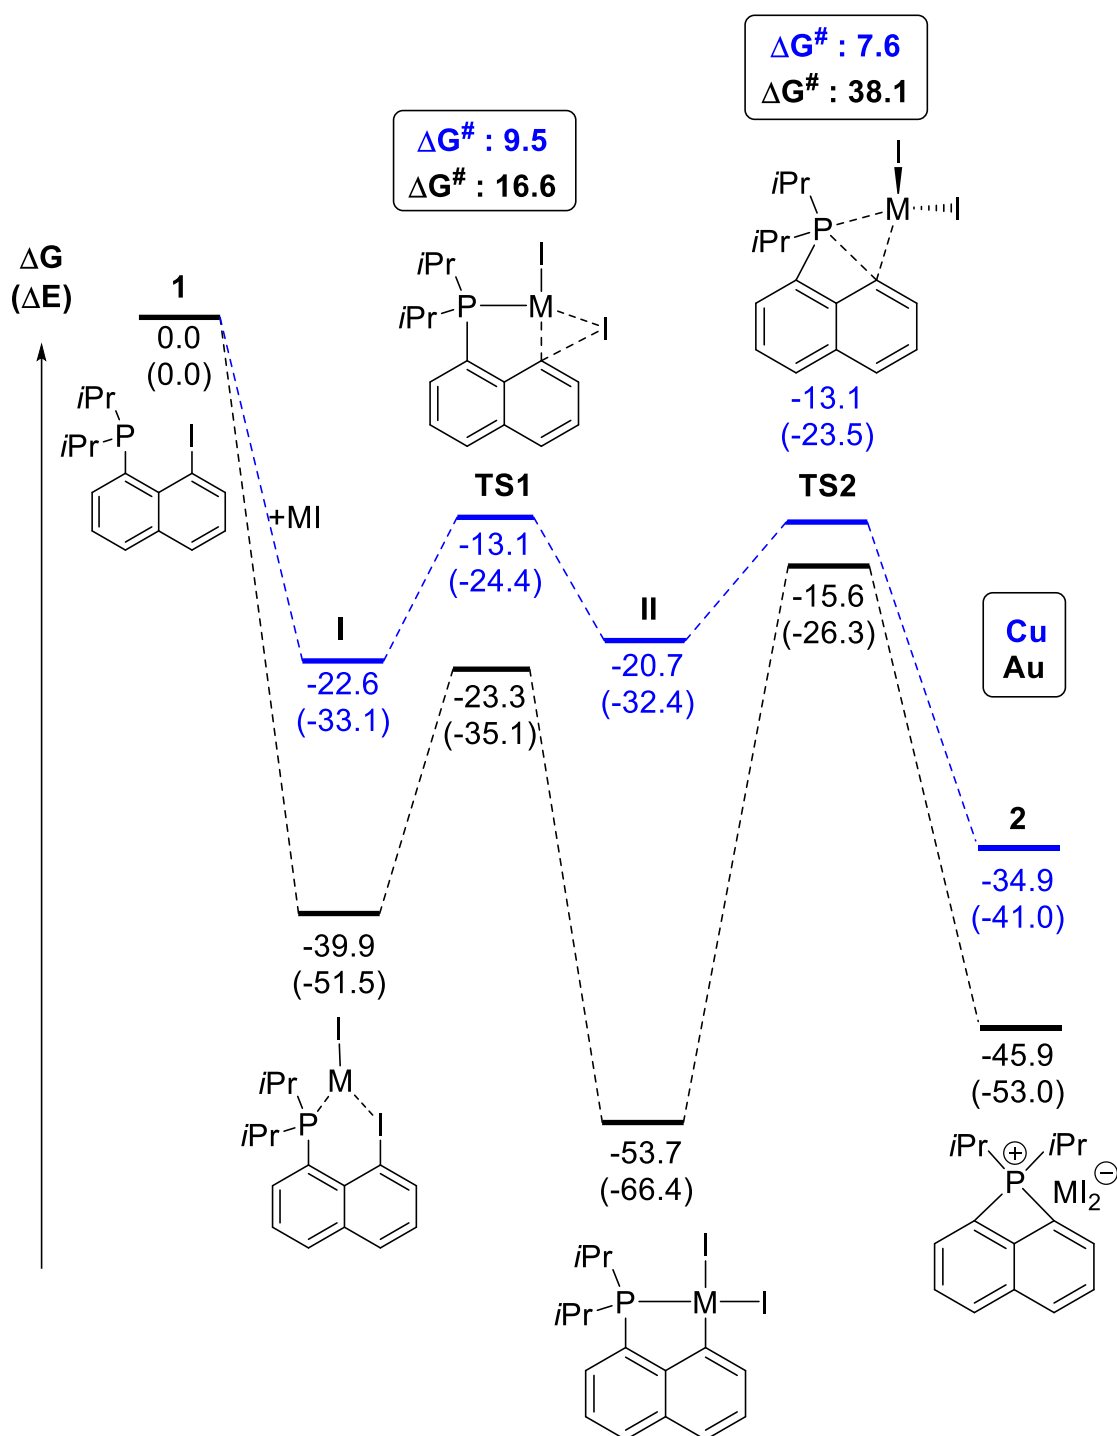

**Figure S24.** Energy profiles computed for the reaction of the *peri*-bromo naphthyl phosphine **1-Br** with CuBr and AuBr at the SMD(DCM)-B3PW91/SDD+f(M),SDD(Br),6-31G\*\*(other atoms) level of theory. Free energies (and electronic energies in brackets) in kcal/mol.

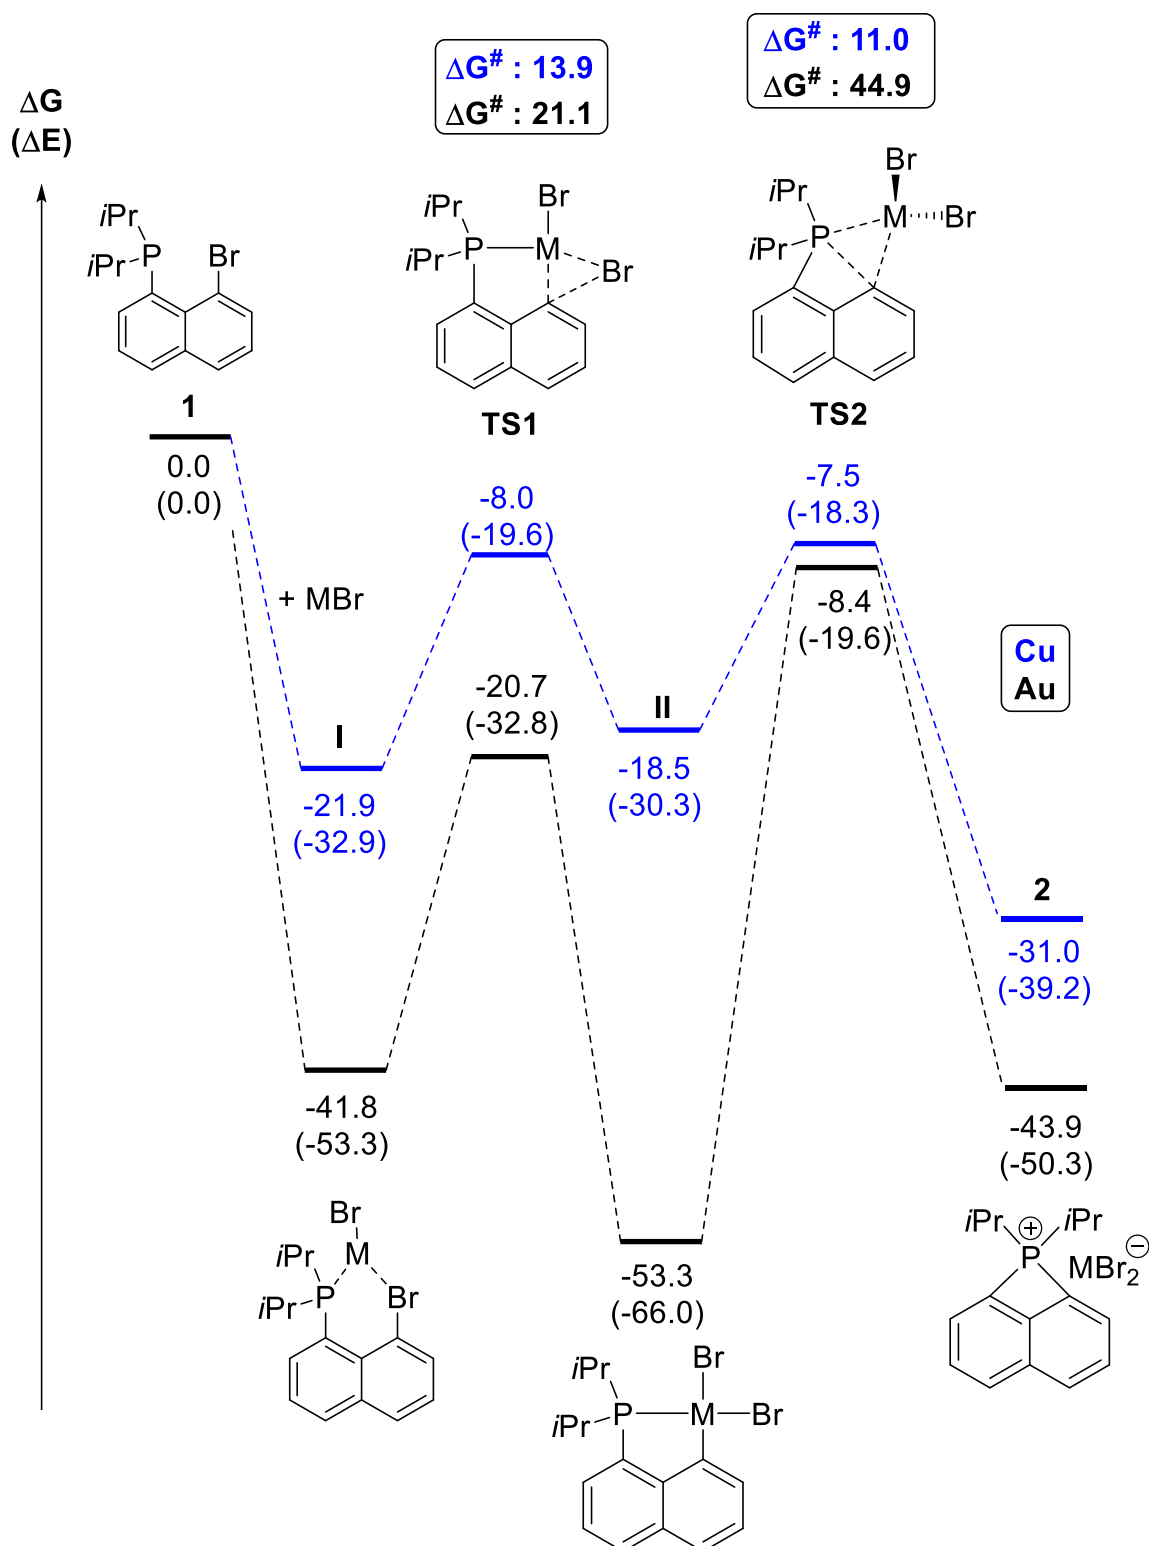

**Figure S25.** Reactions **1-X** (X = Br, I) + AuX in CH<sub>2</sub>Cl<sub>2</sub> (DCM). Main geometrical parameters for **TS1**, **TS2** and complexes **I**, **II**, **2** (distances in Å and bond angles in °) optimized in dichloromethane at SMD(DCM)-B3PW91/SDD+f(Au), I,Br(SDD), 6-31G\*\* (other atoms) level of theory.

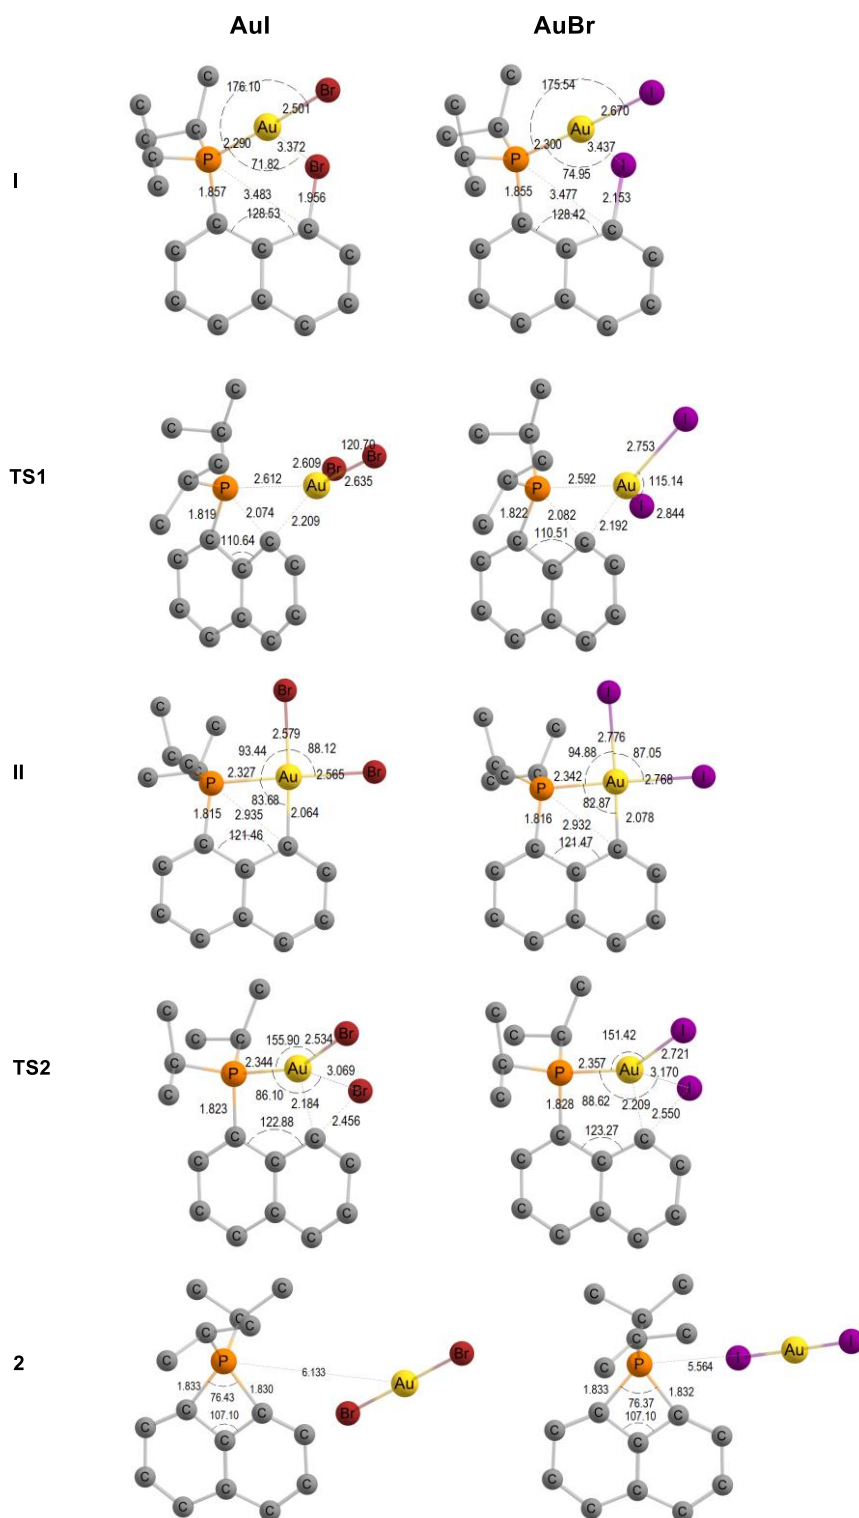

## 7. Z-matrices and energies in au

### 6a in GAS Phase

Sum of electronic and zero-point Energies= -2609.149937  
 Sum of electronic and thermal Enthalpies = -2609.102465  
 Sum of electronic and thermal Free Energies = -2609.237902

|   |          |          |          |
|---|----------|----------|----------|
| C | 3.38260  | 1.07491  | 0.17853  |
| C | 4.11290  | -0.13935 | -0.09852 |
| C | 3.71871  | -1.48647 | 0.15422  |
| C | 4.44845  | -2.57001 | -0.28326 |
| H | 4.08905  | -3.57348 | -0.08546 |
| C | 5.66622  | -2.39429 | -0.96357 |
| H | 6.21756  | -3.26180 | -1.31263 |
| C | 6.15865  | -1.12751 | -1.12687 |
| H | 7.12759  | -0.96233 | -1.58991 |
| C | 5.42565  | 0.00191  | -0.68843 |
| C | 6.02175  | 1.28028  | -0.81957 |
| H | 7.01807  | 1.34075  | -1.24979 |
| C | 5.36538  | 2.40520  | -0.40347 |
| H | 5.82801  | 3.38493  | -0.47361 |
| C | 4.04124  | 2.28934  | 0.05666  |
| H | 3.50413  | 3.20519  | 0.27746  |
| C | 1.20456  | 2.87871  | -0.31230 |
| C | 0.94382  | 4.04113  | 0.42302  |
| H | 0.94112  | 4.01047  | 1.50804  |
| C | 0.69410  | 5.24765  | -0.23165 |
| H | 0.49564  | 6.14291  | 0.35168  |
| C | 0.70923  | 5.30725  | -1.62310 |
| H | 0.52277  | 6.24954  | -2.13133 |
| C | 0.96583  | 4.15128  | -2.36186 |
| H | 0.97485  | 4.18664  | -3.44765 |
| C | 1.20411  | 2.94268  | -1.71452 |
| H | 1.39060  | 2.04202  | -2.29569 |
| C | 1.36641  | 1.57229  | 2.25631  |
| C | 0.07174  | 1.73435  | 2.77147  |
| H | -0.78457 | 1.66342  | 2.10511  |
| C | -0.12594 | 1.99134  | 4.12596  |
| H | -1.13522 | 2.12206  | 4.50629  |
| C | 0.96732  | 2.07149  | 4.98890  |
| H | 0.81406  | 2.26348  | 6.04724  |
| C | 2.25589  | 1.90223  | 4.48746  |
| H | 3.11226  | 1.96081  | 5.15365  |
| C | 2.45625  | 1.65963  | 3.12861  |
| H | 3.46421  | 1.53451  | 2.74571  |
| C | -3.18419 | 0.03561  | 1.01934  |
| C | -3.38399 | 1.43223  | 0.69614  |
| C | -2.95495 | 2.13873  | -0.47102 |
| C | -3.09781 | 3.50536  | -0.60026 |
| H | -2.73368 | 3.99667  | -1.49528 |
| C | -3.73179 | 4.26876  | 0.39520  |
| H | -3.82776 | 5.34292  | 0.27015  |
| C | -4.26371 | 3.63125  | 1.48399  |
| H | -4.81444 | 4.18480  | 2.23969  |
| C | -4.12383 | 2.23177  | 1.64937  |
| C | -4.75416 | 1.62513  | 2.76467  |
| H | -5.31984 | 2.25868  | 3.44303  |
| C | -4.67003 | 0.27573  | 2.96542  |
| H | -5.17977 | -0.20188 | 3.79673  |
| C | -3.86468 | -0.49460 | 2.10611  |
| H | -3.74829 | -1.54733 | 2.33670  |
| C | -2.93128 | -2.09101 | -0.98357 |
| C | -2.24656 | -2.84482 | -1.94536 |
| H | -1.16226 | -2.79496 | -2.00324 |
| C | -2.95481 | -3.62923 | -2.85376 |
| H | -2.41132 | -4.20411 | -3.59812 |
| C | -4.34759 | -3.66183 | -2.81811 |
| H | -4.89782 | -4.26786 | -3.53273 |
| C | -5.03371 | -2.90699 | -1.86781 |
| H | -6.11984 | -2.92193 | -1.83856 |
| C | -4.33070 | -2.12693 | -0.95221 |
| H | -4.87495 | -1.53972 | -0.21917 |
| C | -1.67657 | -2.35644 | 1.58699  |
| C | -1.04213 | -1.93429 | 2.76775  |
| H | -0.76495 | -0.89077 | 2.89247  |
| C | -0.77735 | -2.83689 | 3.79375  |

|    |          |          |          |
|----|----------|----------|----------|
| H  | -0.29580 | -2.48840 | 4.70323  |
| C  | -1.12279 | -4.18245 | 3.65114  |
| H  | -0.90963 | -4.88830 | 4.44888  |
| C  | -1.74005 | -4.61191 | 2.48045  |
| H  | -2.01186 | -5.65675 | 2.35844  |
| C  | -2.02075 | -3.70586 | 1.45557  |
| H  | -2.50930 | -4.05548 | 0.55224  |
| P  | 1.53806  | 1.22967  | 0.45453  |
| P  | -1.93925 | -1.12361 | 0.22850  |
| Cu | 0.12674  | -0.33975 | -0.48321 |
| I  | 2.06304  | -2.01756 | 1.39772  |
| I  | -2.18536 | 1.18270  | -2.21861 |
| I  | 1.13241  | -1.12637 | -2.76973 |

### ■ M-X

#### CuI in GAS phase

Sum of electronic and zero-point Energies= -208.874314  
 Sum of electronic and thermal Enthalpies = -208.870534  
 Sum of electronic and thermal Free Energies = -208.899599

|    |         |         |          |
|----|---------|---------|----------|
| Cu | 0.00000 | 0.00000 | -1.54481 |
| I  | 0.00000 | 0.00000 | 0.84527  |

#### CuI in DCM

Sum of electronic and zero-point Energies= -208.911403  
 Sum of electronic and thermal Enthalpies = -208.907564  
 Sum of electronic and thermal Free Energies = -208.936832

|    |         |         |          |
|----|---------|---------|----------|
| I  | 0.00000 | 0.00000 | 0.87160  |
| Cu | 0.00000 | 0.00000 | -1.59293 |

#### CuI in CH<sub>3</sub>CN

Sum of electronic and zero-point Energies= -208.917295  
 Sum of electronic and thermal Enthalpies = -208.913438  
 Sum of electronic and thermal Free Energies = -208.942765

|    |         |         |          |
|----|---------|---------|----------|
| I  | 0.00000 | 0.00000 | 0.87676  |
| Cu | 0.00000 | 0.00000 | -1.60236 |

#### CuBr in GAS phase

Sum of electronic and zero-point Energies= -210.828120  
 Sum of electronic and thermal Enthalpies = -210.824399  
 Sum of electronic and thermal Free Energies = -210.852611

|    |         |         |          |
|----|---------|---------|----------|
| Br | 0.00000 | 0.00000 | 1.00834  |
| Cu | 0.00000 | 0.00000 | -1.21696 |

#### CuBr in DCM

Sum of electronic and zero-point Energies= -210.864478  
 Sum of electronic and thermal Enthalpies = -210.860742  
 Sum of electronic and thermal Free Energies = -210.889042

|    |         |         |          |
|----|---------|---------|----------|
| Br | 0.00000 | 0.00000 | 1.03825  |
| Cu | 0.00000 | 0.00000 | -1.25306 |

#### CuBr in CH<sub>3</sub>CN

Sum of electronic and zero-point Energies= -210.869457  
 Sum of electronic and thermal Enthalpies = -210.865714  
 Sum of electronic and thermal Free Energies = -210.894036

|    |         |         |          |
|----|---------|---------|----------|
| Br | 0.00000 | 0.00000 | 1.04259  |
| Cu | 0.00000 | 0.00000 | -1.25829 |

#### CuCl in GAS phase

Sum of electronic and zero-point Energies= -657.562690  
 Sum of electronic and thermal Enthalpies = -657.559086  
 Sum of electronic and thermal Free Energies = -657.585995

|    |         |         |          |
|----|---------|---------|----------|
| Cl | 0.00000 | 0.00000 | -1.30681 |
| Cu | 0.00000 | 0.00000 | 0.76606  |

**CuCl in DCM**

Sum of electronic and zero-point Energies= -657.605170  
 Sum of electronic and thermal Enthalpies = -657.601464  
 Sum of electronic and thermal Free Energies = -657.628630  
 Cl 0.00000 0.00000 -1.35016  
 Cu 0.00000 0.00000 0.79147

**CuCl in CH<sub>3</sub>CN**

Sum of electronic and zero-point Energies= -657.611043  
 Sum of electronic and thermal Enthalpies = -657.607318  
 Sum of electronic and thermal Free Energies = -657.634534  
 Cl 0.00000 0.00000 -1.35800  
 Cu 0.00000 0.00000 0.79607

**AuI in DCM**

Sum of electronic and zero-point Energies= -147.311516  
 Sum of electronic and thermal Enthalpies = -147.307607  
 Sum of electronic and thermal Free Energies = -147.338510  
 I 0.00000 0.00000 -1.56126  
 Au 0.00000 0.00000 1.04743

**AuBr in DCM**

Sum of electronic and zero-point Energies= -149.265169  
 Sum of electronic and thermal Enthalpies = -149.261336  
 Sum of electronic and thermal Free Energies = -149.291386  
 Br 0.00000 0.00000 -1.70070  
 Au 0.00000 0.00000 0.75348

**Profiles with Copper**

- X : I, gas phase**

**CuI profile compound 1 in GAS phase**

Sum of electronic and zero-point Energies= -973.963847  
 Sum of electronic and thermal Enthalpies = -973.943653  
 Sum of electronic and thermal Free Energies = -974.011950  
 P 1.51024 -0.06812 0.38440  
 C 2.10916 -0.80141 -1.26349  
 H 1.16155 -0.98565 -1.78541  
 C -1.90981 -0.15857 0.20873  
 C -1.17084 1.03213 -0.08359  
 C -3.26733 -0.15207 0.45246  
 C 0.26172 1.18839 -0.22458  
 C -1.99117 2.21363 -0.25453  
 C -4.01423 1.03640 0.37450  
 H -3.77640 -1.08261 0.67697  
 C 0.74501 2.41123 -0.66390  
 C -1.41416 3.43585 -0.68210  
 C -3.38524 2.18999 -0.00801  
 H -5.08066 1.01576 0.57702  
 C -0.07200 3.52832 -0.92141  
 H 1.81481 2.54164 -0.78159  
 H -2.06840 4.29327 -0.81662  
 H -3.94427 3.11325 -0.13415  
 H 0.37289 4.45689 -1.26723  
 C 2.92845 1.02788 0.97456  
 H 3.29265 1.69230 0.18053  
 C 2.77225 -2.16474 -1.03812  
 H 2.14307 -2.81823 -0.42682  
 H 2.94910 -2.66352 -1.99864  
 H 3.74061 -2.07448 -0.53659  
 C 2.96236 0.10333 -2.15054  
 H 3.92888 0.33589 -1.69052  
 H 3.17238 -0.39571 -3.10468  
 H 2.45609 1.04489 -2.38115  
 C 4.09699 0.13254 1.40466  
 H 3.77775 -0.61222 2.14224  
 H 4.54756 -0.39946 0.56265  
 H 4.88355 0.74170 1.86556  
 C 2.45675 1.87601 2.16030  
 H 2.08281 1.23852 2.96933

H 3.29024 2.46627 2.55944  
 H 1.65683 2.56810 1.88434  
 I -1.12645 -2.16695 0.11377

**CuI profile compound 2 in GAS phase**

Sum of electronic and zero-point Energies= -1182.905712  
 Sum of electronic and thermal Enthalpies = -1182.880654  
 Sum of electronic and thermal Free Energies = -1182.965164  
 C -5.05723 1.25518 -0.49576  
 C -4.44456 1.45327 -1.72583  
 C -3.17006 0.88547 -1.99678  
 C -2.64924 0.14090 -0.93369  
 C -4.48521 0.49501 0.56710  
 C -2.31542 0.93608 -3.13135  
 C -1.08742 0.28894 -3.11463  
 H -2.61274 1.49081 -4.01692  
 H -6.02855 1.71042 -0.32500  
 H -4.94712 2.05509 -2.47804  
 H -5.01811 0.39030 1.50667  
 H -0.45551 0.36010 -3.99499  
 C -0.58288 -0.45372 -2.00520  
 H 0.40237 -0.90999 -2.04242  
 C -1.40310 -0.51457 -0.90674  
 I 3.02059 -1.62610 -0.67829  
 C -3.25653 -0.06650 0.31943  
 C -0.83840 -0.28382 2.20583  
 H -0.48338 0.67614 1.79656  
 C -2.01995 -2.84070 1.03554  
 H -2.01330 -2.98876 2.12376  
 P -1.77230 -1.02494 0.80983  
 Cu 2.24106 0.64523 -0.07416  
 I 1.15361 2.75437 0.60815  
 C -0.84278 -3.60266 0.40740  
 H 0.13452 -3.26069 0.75603  
 H -0.93599 -4.66479 0.65383  
 H -0.85813 -3.50624 -0.68183  
 C -3.36599 -3.30015 0.46776  
 H -3.46596 -4.37960 0.61749  
 H -4.21348 -2.81007 0.95363  
 H -3.43043 -3.10725 -0.60755  
 C 0.37598 -1.11274 2.63075  
 H 0.91376 -0.55228 3.40123  
 H 0.08855 -2.07801 3.06152  
 H 1.07910 -1.27828 1.80911  
 C -1.80622 -0.02138 3.36822  
 H -2.62526 0.64441 3.08360  
 H -2.22662 -0.94664 3.77922  
 H -1.24816 0.46748 4.17227

**CuI profile compound I in GAS phase**

Sum of electronic and zero-point Energies= -1182.909676  
 Sum of electronic and thermal Enthalpies = -1182.885186  
 Sum of electronic and thermal Free Energies = -1182.966374  
 C 4.22290 1.37349 -1.28843  
 C 4.40966 0.06832 -1.65102  
 C 3.48065 -0.93284 -1.27029  
 C 2.33033 -0.59233 -0.46432  
 C 3.03080 1.73240 -0.63086  
 C 3.71605 -2.26614 -1.68523  
 C 2.88087 -3.28116 -1.30146  
 H 4.57989 -2.46411 -2.31359  
 H 4.94569 2.13860 -1.55427  
 H 5.27737 -0.23088 -2.23280  
 H 2.85016 2.78927 -0.47080  
 H 3.04440 -4.30103 -1.63481  
 C 1.83663 -3.00326 -0.40052  
 H 1.23940 -3.82015 -0.01127  
 C 1.59816 -1.71567 0.02990  
 I 0.23796 -1.63392 1.69436  
 C 2.06546 0.81253 -0.25330  
 C 0.60779 2.10603 1.98030  
 H 1.13124 1.25935 2.44061  
 C 0.25179 3.03994 -0.88619  
 H 1.09248 3.71582 -0.68958  
 P 0.40696 1.51935 0.20137

|    |          |          |          |
|----|----------|----------|----------|
| Cu | -1.34434 | 0.23302  | -0.19415 |
| I  | -3.48439 | -0.67104 | -0.95914 |
| C  | -1.04869 | 3.78350  | -0.55834 |
| H  | -1.92004 | 3.12791  | -0.66595 |
| H  | -1.05458 | 4.19954  | 0.45226  |
| H  | -1.17265 | 4.61818  | -1.25705 |
| C  | 0.26674  | 2.62659  | -2.36156 |
| H  | 1.19560  | 2.12741  | -2.64871 |
| H  | -0.56723 | 1.95150  | -2.58371 |
| H  | 0.15276  | 3.51538  | -2.99193 |
| C  | -0.74592 | 2.24984  | 2.68373  |
| H  | -1.35042 | 1.34282  | 2.58906  |
| H  | -0.58736 | 2.44134  | 3.75097  |
| H  | -1.33391 | 3.08088  | 2.28501  |
| C  | 1.48074  | 3.35019  | 2.14878  |
| H  | 1.60874  | 3.56477  | 3.21564  |
| H  | 2.47924  | 3.21358  | 1.72461  |
| H  | 1.02744  | 4.23620  | 1.69277  |

#### CuI profile TS1 in GAS phase

Sum of electronic and zero-point Energies= -1182.896750

Sum of electronic and thermal Enthalpies = -1182.872813

Sum of electronic and thermal Free Energies = -1182.951533

|    |          |          |          |
|----|----------|----------|----------|
| C  | 0.73294  | -2.58986 | -1.03369 |
| C  | 0.87209  | -1.36642 | -0.40254 |
| C  | 2.06984  | -0.59123 | -0.55534 |
| C  | 3.17246  | -1.19690 | -1.23616 |
| C  | 3.00282  | -2.46395 | -1.85646 |
| C  | 1.79020  | -3.10699 | -1.81759 |
| H  | -0.16419 | -3.18135 | -0.88920 |
| C  | 2.15873  | 0.77454  | -0.16754 |
| C  | 4.38506  | -0.47228 | -1.34076 |
| H  | 3.84464  | -2.90502 | -2.38324 |
| H  | 1.65145  | -4.05696 | -2.32477 |
| C  | 4.48783  | 0.81197  | -0.85776 |
| C  | 3.35564  | 1.45342  | -0.31531 |
| H  | 5.22849  | -0.93948 | -1.84261 |
| H  | 5.42209  | 1.35778  | -0.94982 |
| H  | 3.42351  | 2.50643  | -0.05928 |
| I  | -0.10610 | -1.77766 | 1.88357  |
| C  | 0.61092  | 2.09489  | 2.01194  |
| H  | 1.03525  | 1.20497  | 2.49455  |
| C  | 0.48086  | 3.05396  | -0.88352 |
| H  | 1.36102  | 3.67170  | -0.65718 |
| Cu | -0.79801 | -0.29287 | -0.23190 |
| I  | -3.15199 | -0.12469 | -1.05723 |
| P  | 0.54154  | 1.55009  | 0.22049  |
| C  | -0.79011 | 3.86904  | -0.62267 |
| H  | -0.85263 | 4.68831  | -1.34730 |
| H  | -1.68625 | 3.25063  | -0.73982 |
| H  | -0.80602 | 4.31315  | 0.37571  |
| C  | 0.54695  | 2.60582  | -2.34758 |
| H  | 1.46084  | 2.04818  | -2.56968 |
| H  | -0.31273 | 1.97648  | -2.60161 |
| H  | 0.52330  | 3.48492  | -3.00087 |
| C  | -0.79329 | 2.30661  | 2.59105  |
| H  | -1.44335 | 1.44835  | 2.40200  |
| H  | -0.72101 | 2.44336  | 3.67563  |
| H  | -1.28106 | 3.19472  | 2.18021  |
| C  | 1.53475  | 3.28254  | 2.28815  |
| H  | 1.55674  | 3.48417  | 3.36514  |
| H  | 2.56357  | 3.08846  | 1.97323  |
| H  | 1.18804  | 4.19642  | 1.79525  |

#### CuI profile compound II in GAS phase

Sum of electronic and zero-point Energies= -1182.906529

Sum of electronic and thermal Enthalpies = -1182.882163

Sum of electronic and thermal Free Energies = -1182.962069

|   |         |          |          |
|---|---------|----------|----------|
| C | 4.93611 | -0.34595 | 0.01432  |
| C | 4.85014 | 0.99088  | 0.33065  |
| C | 3.59653 | 1.63720  | 0.46389  |
| C | 2.40502 | 0.87373  | 0.24238  |
| C | 3.76403 | -1.10646 | -0.18070 |
| C | 3.47638 | 2.99212  | 0.85653  |

|    |          |          |          |
|----|----------|----------|----------|
| C  | 2.23388  | 3.54832  | 1.03139  |
| H  | 4.37695  | 3.57563  | 1.02886  |
| H  | 5.90603  | -0.82588 | -0.07485 |
| H  | 5.75399  | 1.56900  | 0.50628  |
| H  | 3.85503  | -2.16477 | -0.40747 |
| H  | 2.13720  | 4.58334  | 1.34754  |
| C  | 1.05376  | 2.80301  | 0.78410  |
| H  | 0.09760  | 3.29816  | 0.89552  |
| C  | 1.12403  | 1.48066  | 0.39489  |
| I  | -2.39702 | -1.19403 | 0.97629  |
| C  | 2.52553  | -0.50099 | -0.08067 |
| C  | 0.68368  | -1.41234 | -2.17118 |
| H  | 0.93335  | -0.38700 | -2.47665 |
| C  | 1.09256  | -2.97082 | 0.47110  |
| H  | 2.07303  | -3.29699 | 0.09401  |
| P  | 0.90650  | -1.29079 | -0.31522 |
| Cu | -0.49866 | 0.38168  | 0.26673  |
| I  | -2.00431 | 2.20773  | -0.72243 |
| C  | 0.05677  | -4.02108 | 0.06902  |
| H  | 0.03932  | -4.20296 | -1.00814 |
| H  | 0.31251  | -4.96721 | 0.55879  |
| H  | -0.94700 | -3.73390 | 0.38837  |
| C  | 1.18720  | -2.80841 | 1.99244  |
| H  | 0.23403  | -2.46501 | 2.40438  |
| H  | 1.42576  | -3.77651 | 2.44534  |
| H  | 1.96853  | -2.10049 | 2.28384  |
| C  | -0.75748 | -1.69558 | -2.60374 |
| H  | -0.81083 | -1.65038 | -3.69686 |
| H  | -1.09744 | -2.68684 | -2.29329 |
| H  | -1.45734 | -0.95870 | -2.20259 |
| C  | 1.69050  | -2.36752 | -2.82037 |
| H  | 1.50881  | -3.40914 | -2.53884 |
| H  | 1.58931  | -2.30218 | -3.90897 |
| H  | 2.72361  | -2.11184 | -2.57098 |

#### CuI profile TS2 in GAS phase

Sum of electronic and zero-point Energies= -1182.879442

Sum of electronic and thermal Enthalpies = -1182.855529

Sum of electronic and thermal Free Energies = -1182.934106

|    |          |          |          |
|----|----------|----------|----------|
| C  | -4.65335 | -0.41507 | 0.54274  |
| C  | -4.58707 | -0.21090 | -0.82626 |
| C  | -3.33700 | -0.22589 | -1.49859 |
| C  | -2.22254 | -0.40342 | -0.66126 |
| C  | -3.50785 | -0.66692 | 1.34678  |
| C  | -3.04371 | -0.11825 | -2.88438 |
| C  | -1.74093 | -0.24889 | -3.33063 |
| H  | -3.84495 | 0.04317  | -3.60009 |
| H  | -5.62575 | -0.39926 | 1.02646  |
| H  | -5.50250 | -0.04596 | -1.38811 |
| H  | -3.63000 | -0.85964 | 2.40765  |
| H  | -1.54161 | -0.18975 | -4.39700 |
| C  | -0.62754 | -0.46057 | -2.46460 |
| H  | 0.37352  | -0.56988 | -2.86924 |
| C  | -0.89088 | -0.46737 | -1.11154 |
| I  | 2.95434  | -0.55222 | -0.93103 |
| C  | -2.28537 | -0.65337 | 0.71565  |
| C  | 0.06067  | -0.34750 | 2.56582  |
| H  | -0.43814 | 0.62957  | 2.55475  |
| C  | -0.29369 | -2.86783 | 0.87577  |
| H  | -0.96949 | -3.15622 | 1.69405  |
| P  | -0.49486 | -1.00869 | 0.88342  |
| Cu | 0.74667  | 0.55550  | -0.32551 |
| I  | -0.00140 | 2.83989  | 0.47137  |
| C  | 1.12202  | -3.34462 | 1.21368  |
| H  | 1.45606  | -3.00691 | 2.19657  |
| H  | 1.12459  | -4.43979 | 1.22341  |
| H  | 1.84844  | -3.00275 | 0.47238  |
| C  | -0.80222 | -3.50497 | -0.41702 |
| H  | -0.78230 | -4.59365 | -0.30170 |
| H  | -1.82779 | -3.21313 | -0.65659 |
| H  | -0.15763 | -3.24326 | -1.26005 |
| C  | 1.55347  | -0.11805 | 2.77911  |
| H  | 1.69158  | 0.29162  | 3.78577  |
| H  | 2.14269  | -1.03397 | 2.70098  |
| H  | 1.95593  | 0.60584  | 2.06798  |

|   |          |          |         |
|---|----------|----------|---------|
| C | -0.55846 | -1.23284 | 3.65748 |
| H | -1.62560 | -1.42301 | 3.51058 |
| H | -0.04356 | -2.19277 | 3.75369 |
| H | -0.45353 | -0.70731 | 4.61285 |

### ▪ X : I, DCM

#### CuI profile compound 1 in DCM

Sum of electronic and zero-point Energies= -973.983712  
 Sum of electronic and thermal Enthalpies = -973.963550  
 Sum of electronic and thermal Free Energies = -974.031626

|   |          |          |          |
|---|----------|----------|----------|
| P | -1.51063 | -0.04335 | -0.39442 |
| C | -2.15879 | -0.84870 | 1.19758  |
| H | -1.22966 | -1.05971 | 1.74193  |
| C | 1.90722  | -0.16096 | -0.23875 |
| C | 1.17493  | 1.02312  | 0.09533  |
| C | 3.25246  | -0.14506 | -0.54298 |
| C | -0.25400 | 1.17305  | 0.27343  |
| C | 1.99771  | 2.20172  | 0.27090  |
| C | 3.99534  | 1.04881  | -0.47908 |
| H | 3.76009  | -1.06888 | -0.79901 |
| C | -0.72773 | 2.37600  | 0.77547  |
| C | 1.43306  | 3.40560  | 0.76551  |
| C | 3.38115  | 2.19041  | -0.03677 |
| H | 5.05138  | 1.03760  | -0.73177 |
| C | 0.09897  | 3.48169  | 1.05784  |
| H | -1.79430 | 2.50496  | 0.92266  |
| H | 2.08972  | 4.26014  | 0.90673  |
| H | 3.94230  | 3.11235  | 0.09135  |
| H | -0.33590 | 4.39352  | 1.45720  |
| C | -2.89781 | 1.08969  | -0.98192 |
| H | -3.26105 | 1.73127  | -0.17020 |
| C | -2.81848 | -2.19720 | 0.88820  |
| H | -2.17064 | -2.83242 | 0.27515  |
| H | -3.03218 | -2.73516 | 1.82025  |
| H | -3.76757 | -2.08055 | 0.35543  |
| C | -3.04142 | 0.01811  | 2.09349  |
| H | -3.98480 | 0.28743  | 1.60665  |
| H | -3.29597 | -0.53184 | 3.00863  |
| H | -2.53881 | 0.94023  | 2.39961  |
| C | -4.07257 | 0.23007  | -1.46200 |
| H | -3.75811 | -0.49708 | -2.22020 |
| H | -4.54945 | -0.31913 | -0.64565 |
| H | -4.83922 | 0.86983  | -1.91626 |
| C | -2.39150 | 1.97028  | -2.12795 |
| H | -2.02150 | 1.36040  | -2.96092 |
| H | -3.20800 | 2.59400  | -2.51213 |
| H | -1.58198 | 2.63724  | -1.81761 |
| I | 1.13045  | -2.17158 | -0.07897 |

#### CuI profile compound 2 in DCM

Sum of electronic and zero-point Energies= -1182.960416  
 Sum of electronic and thermal Enthalpies = -1182.935147  
 Sum of electronic and thermal Free Energies = -1183.024142

|   |          |          |          |
|---|----------|----------|----------|
| C | 5.39650  | -1.92230 | -0.63433 |
| C | 4.56971  | -2.25475 | -1.69987 |
| C | 3.32156  | -1.59514 | -1.87407 |
| C | 3.05653  | -0.62656 | -0.90008 |
| C | 5.08401  | -0.93091 | 0.34433  |
| C | 2.28951  | -1.72916 | -2.84365 |
| C | 1.14889  | -0.93995 | -2.76849 |
| H | 2.38563  | -2.45124 | -3.64998 |
| H | 6.34136  | -2.44897 | -0.53256 |
| H | 4.88447  | -3.02575 | -2.39777 |
| H | 5.77776  | -0.72730 | 1.15341  |
| H | 0.38125  | -1.07088 | -3.52596 |
| C | 0.91248  | 0.03446  | -1.75196 |
| H | -0.00748 | 0.60945  | -1.75134 |
| C | 1.90274  | 0.17655  | -0.81157 |
| I | -3.23387 | 2.03525  | -0.73099 |
| C | 3.88459  | -0.28240 | 0.18568  |
| C | 1.77598  | 0.42524  | 2.28341  |
| H | 1.53118  | -0.63042 | 2.11096  |

|    |          |          |          |
|----|----------|----------|----------|
| C  | 3.02087  | 2.70454  | 0.65043  |
| H  | 3.16399  | 2.98347  | 1.70216  |
| P  | 2.59798  | 0.91135  | 0.71403  |
| Cu | -2.72598 | -0.30402 | 0.00767  |
| I  | -2.18634 | -2.63065 | 0.75794  |
| C  | 1.85076  | 3.50589  | 0.06438  |
| H  | 0.91589  | 3.36059  | 0.61153  |
| H  | 2.10241  | 4.57010  | 0.11174  |
| H  | 1.68202  | 3.24599  | -0.98480 |
| C  | 4.32125  | 2.93832  | -0.12149 |
| H  | 4.53951  | 4.01106  | -0.11935 |
| H  | 5.16982  | 2.41944  | 0.33207  |
| H  | 4.23443  | 2.61741  | -1.16440 |
| C  | 0.48379  | 1.20392  | 2.53918  |
| H  | -0.00005 | 0.78633  | 3.42770  |
| H  | 0.68046  | 2.26259  | 2.73252  |
| H  | -0.22250 | 1.12221  | 1.70791  |
| C  | 2.77379  | 0.52924  | 3.44235  |
| H  | 3.67074  | -0.07279 | 3.26948  |
| H  | 3.07591  | 1.56453  | 3.63015  |
| H  | 2.29055  | 0.15443  | 4.35020  |

#### CuI profile compound I in DCM

Sum of electronic and zero-point Energies= -1182.947903  
 Sum of electronic and thermal Enthalpies = -1182.923398  
 Sum of electronic and thermal Free Energies = -1183.004509

|    |          |          |          |
|----|----------|----------|----------|
| C  | 4.28413  | 0.87045  | -1.44049 |
| C  | 4.28499  | -0.45835 | -1.76793 |
| C  | 3.25100  | -1.31867 | -1.31573 |
| C  | 2.19166  | -0.80514 | -0.47774 |
| C  | 3.17326  | 1.40539  | -0.75792 |
| C  | 3.29254  | -2.68536 | -1.68881 |
| C  | 2.35364  | -3.57024 | -1.22612 |
| H  | 4.09301  | -3.01405 | -2.34605 |
| H  | 5.09003  | 1.52617  | -1.75612 |
| H  | 5.08104  | -0.88581 | -2.37173 |
| H  | 3.13788  | 2.48163  | -0.62903 |
| H  | 2.36886  | -4.61424 | -1.52383 |
| C  | 1.40380  | -3.13062 | -0.28390 |
| H  | 0.73878  | -3.85430 | 0.17512  |
| C  | 1.35176  | -1.80746 | 0.10073  |
| I  | 0.13752  | -1.48720 | 1.85356  |
| C  | 2.11300  | 0.62899  | -0.31694 |
| C  | 0.84272  | 2.18628  | 1.88005  |
| H  | 1.28648  | 1.31343  | 2.37319  |
| C  | 0.54508  | 3.02000  | -1.02396 |
| H  | 1.46170  | 3.60220  | -0.87793 |
| P  | 0.55975  | 1.54548  | 0.13298  |
| Cu | -1.29416 | 0.37258  | -0.17001 |
| I  | -3.49577 | -0.56614 | -0.95889 |
| C  | -0.65095 | 3.91858  | -0.69452 |
| H  | -1.59496 | 3.36249  | -0.73887 |
| H  | -0.57032 | 4.37842  | 0.29369  |
| H  | -0.70852 | 4.72890  | -1.43046 |
| C  | 0.47371  | 2.54601  | -2.47750 |
| H  | 1.33262  | 1.93217  | -2.76223 |
| H  | -0.43640 | 1.96057  | -2.65446 |
| H  | 0.44709  | 3.41419  | -3.14606 |
| C  | -0.48014 | 2.49454  | 2.58729  |
| H  | -1.18071 | 1.65542  | 2.52239  |
| H  | -0.29084 | 2.69300  | 3.64874  |
| H  | -0.97490 | 3.37754  | 2.17216  |
| C  | 1.83271  | 3.34623  | 1.98366  |
| H  | 1.98885  | 3.59449  | 3.04005  |
| H  | 2.81028  | 3.09488  | 1.56238  |
| H  | 1.46367  | 4.24893  | 1.48647  |

#### CuI profile TS1 in DCM

Sum of electronic and zero-point Energies= -1182.933943  
 Sum of electronic and thermal Enthalpies = -1182.909909  
 Sum of electronic and thermal Free Energies = -1182.989308

|   |         |          |          |
|---|---------|----------|----------|
| C | 0.73019 | -2.57639 | -1.10873 |
| C | 0.88373 | -1.37666 | -0.43866 |
| C | 2.11043 | -0.63804 | -0.50247 |



|    |          |          |          |
|----|----------|----------|----------|
| C  | 3.22847  | -1.27246 | -1.13119 |
| C  | 3.04700  | -2.51485 | -1.79952 |
| C  | 1.81008  | -3.10991 | -1.85331 |
| H  | -0.18742 | -3.14718 | -1.01742 |
| C  | 2.22281  | 0.71538  | -0.08133 |
| C  | 4.47285  | -0.59512 | -1.14256 |
| H  | 3.90291  | -2.97499 | -2.28585 |
| H  | 1.66458  | -4.04015 | -2.39454 |
| C  | 4.59238  | 0.67280  | -0.61868 |
| C  | 3.45291  | 1.34956  | -0.13628 |
| H  | 5.32611  | -1.08348 | -1.60615 |
| H  | 5.55082  | 1.18332  | -0.63628 |
| H  | 3.54450  | 2.39364  | 0.14765  |
| I  | -0.19726 | -1.83071 | 1.79717  |
| C  | 0.56792  | 2.07266  | 2.00565  |
| H  | 0.94718  | 1.17172  | 2.50469  |
| C  | 0.72387  | 3.08241  | -0.86980 |
| H  | 1.61838  | 3.63202  | -0.54981 |
| Cu | -0.76545 | -0.25558 | -0.32077 |
| I  | -3.27883 | -0.04083 | -1.00327 |
| P  | 0.61807  | 1.56034  | 0.20388  |
| C  | -0.50573 | 3.97582  | -0.69040 |
| H  | -0.44346 | 4.82090  | -1.38552 |
| H  | -1.43121 | 3.43265  | -0.91079 |
| H  | -0.58077 | 4.38530  | 0.32001  |
| C  | 0.88861  | 2.66829  | -2.33458 |
| H  | 1.78260  | 2.06001  | -2.49863 |
| H  | 0.01860  | 2.10207  | -2.68610 |
| H  | 0.97739  | 3.56418  | -2.95943 |
| C  | -0.87020 | 2.29872  | 2.48381  |
| H  | -1.51626 | 1.44755  | 2.24819  |
| H  | -0.87388 | 2.43257  | 3.57156  |
| H  | -1.31698 | 3.19383  | 2.04119  |
| C  | 1.48368  | 3.24504  | 2.36037  |
| H  | 1.44458  | 3.41879  | 3.44231  |
| H  | 2.52749  | 3.05007  | 2.09922  |
| H  | 1.17093  | 4.17199  | 1.86935  |

#### CuI profile compound II in DCM

Sum of electronic and zero-point Energies= -1182.946728  
 Sum of electronic and thermal Enthalpies = -1182.922314  
 Sum of electronic and thermal Free Energies = -1183.001514

|    |          |          |          |
|----|----------|----------|----------|
| C  | 4.96469  | 0.31090  | 0.00870  |
| C  | 4.86933  | -1.01403 | -0.35628 |
| C  | 3.60796  | -1.64234 | -0.51214 |
| C  | 2.42992  | -0.87004 | -0.25971 |
| C  | 3.80183  | 1.08006  | 0.23315  |
| C  | 3.46259  | -2.98031 | -0.95567 |
| C  | 2.20999  | -3.50835 | -1.15384 |
| H  | 4.35270  | -3.57318 | -1.14918 |
| H  | 5.93883  | 0.77927  | 0.11373  |
| H  | 5.76762  | -1.59285 | -0.55612 |
| H  | 3.90404  | 2.12841  | 0.49562  |
| H  | 2.09524  | -4.52927 | -1.50814 |
| C  | 1.03950  | -2.75212 | -0.88047 |
| H  | 0.07576  | -3.22669 | -1.01786 |
| C  | 1.14536  | -1.44918 | -0.44237 |
| I  | -2.41580 | 1.25196  | -1.03107 |
| C  | 2.55901  | 0.48786  | 0.11328  |
| C  | 0.68694  | 1.34906  | 2.21815  |
| H  | 0.93426  | 0.31875  | 2.50646  |
| C  | 1.11614  | 2.96034  | -0.40292 |
| H  | 2.09021  | 3.27550  | 0.00057  |
| P  | 0.94400  | 1.27555  | 0.36907  |
| Cu | -0.48599 | -0.36560 | -0.30110 |
| I  | -2.03304 | -2.24171 | 0.76861  |
| C  | 0.07913  | 4.00370  | 0.00427  |
| H  | 0.03606  | 4.15142  | 1.08550  |
| H  | 0.35984  | 4.96038  | -0.45065 |
| H  | -0.91898 | 3.74116  | -0.35245 |
| C  | 1.24125  | 2.82855  | -1.92321 |
| H  | 0.29436  | 2.50949  | -2.36894 |
| H  | 1.50159  | 3.80519  | -2.34491 |
| H  | 2.02128  | 2.12014  | -2.21778 |
| C  | -0.75754 | 1.62967  | 2.63500  |

|   |          |         |         |
|---|----------|---------|---------|
| H | -0.82171 | 1.56190 | 3.72657 |
| H | -1.08796 | 2.63005 | 2.34354 |
| H | -1.45451 | 0.90070 | 2.21420 |
| C | 1.68437  | 2.29542 | 2.89413 |
| H | 1.50045  | 3.34209 | 2.63499 |
| H | 1.56926  | 2.19860 | 3.97943 |
| H | 2.72143  | 2.04978 | 2.65164 |

#### CuI profile TS2 in DCM

Sum of electronic and zero-point Energies= -1182.932638  
 Sum of electronic and thermal Enthalpies = -1182.908447  
 Sum of electronic and thermal Free Energies = -1182.989330

|    |          |          |          |
|----|----------|----------|----------|
| C  | -4.64575 | 0.66867  | 0.44756  |
| C  | -4.49817 | 0.88163  | -0.91313 |
| C  | -3.27566 | 0.56886  | -1.56553 |
| C  | -2.24644 | 0.11274  | -0.71960 |
| C  | -3.62084 | 0.10695  | 1.25657  |
| C  | -2.96212 | 0.61747  | -2.94984 |
| C  | -1.73462 | 0.16842  | -3.40370 |
| H  | -3.70106 | 0.97897  | -3.65952 |
| H  | -5.59446 | 0.91082  | 0.91761  |
| H  | -5.32919 | 1.27906  | -1.48950 |
| H  | -3.81486 | -0.11123 | 2.30104  |
| H  | -1.52490 | 0.18496  | -4.46960 |
| C  | -0.71576 | -0.32415 | -2.53718 |
| H  | 0.22277  | -0.68024 | -2.94929 |
| C  | -0.97015 | -0.26704 | -1.18183 |
| I  | 3.12513  | -0.73964 | -0.80927 |
| C  | -2.41459 | -0.15644 | 0.64836  |
| C  | -0.02313 | -0.84838 | 2.50518  |
| H  | 0.35456  | 0.17921  | 2.47309  |
| C  | -1.13324 | -2.90007 | 0.58224  |
| H  | -1.18876 | -3.27935 | 1.61191  |
| P  | -0.86015 | -1.07900 | 0.84331  |
| Cu | 0.73770  | 0.22179  | -0.28985 |
| I  | 0.69802  | 2.73552  | 0.68253  |
| C  | 0.06943  | -3.53273 | -0.12486 |
| H  | 1.01769  | -3.32915 | 0.37650  |
| H  | -0.07306 | -4.61821 | -0.14792 |
| H  | 0.14465  | -3.17878 | -1.15729 |
| C  | -2.44212 | -3.22046 | -0.13644 |
| H  | -2.55140 | -4.30938 | -0.17668 |
| H  | -3.31500 | -2.81506 | 0.38075  |
| H  | -2.43958 | -2.85064 | -1.16608 |
| C  | 1.13433  | -1.81211 | 2.75289  |
| H  | 1.59935  | -1.54076 | 3.70647  |
| H  | 0.79559  | -2.84960 | 2.83355  |
| H  | 1.90341  | -1.74758 | 1.97926  |
| C  | -1.11012 | -0.95161 | 3.58458  |
| H  | -1.85147 | -0.15370 | 3.50547  |
| H  | -1.62041 | -1.92059 | 3.57327  |
| H  | -0.61847 | -0.84792 | 4.55842  |

#### ▪ X : I, CH<sub>3</sub>CN

##### CuI profile compound 1 in CH<sub>3</sub>CN

Sum of electronic and zero-point Energies= -973.981935  
 Sum of electronic and thermal Enthalpies = -973.961735  
 Sum of electronic and thermal Free Energies = -974.030034

|   |          |          |          |
|---|----------|----------|----------|
| P | -1.51283 | -0.04287 | -0.39318 |
| C | -2.15252 | -0.85391 | 1.19834  |
| H | -1.22148 | -1.05818 | 1.74197  |
| C | 1.90823  | -0.15783 | -0.23831 |
| C | 1.17346  | 1.02547  | 0.09406  |
| C | 3.25462  | -0.14035 | -0.53838 |
| C | -0.25591 | 1.17418  | 0.27104  |
| C | 1.99452  | 2.20565  | 0.26948  |
| C | 3.99614  | 1.05445  | -0.47287 |
| H | 3.76474  | -1.06342 | -0.79229 |
| C | -0.73187 | 2.37715  | 0.77146  |
| C | 1.42775  | 3.41012  | 0.76062  |
| C | 3.37893  | 2.19603  | -0.03422 |
| H | 5.05305  | 1.04398  | -0.72189 |

|   |          |          |          |
|---|----------|----------|----------|
| C | 0.09324  | 3.48466  | 1.05200  |
| H | -1.79847 | 2.50496  | 0.91911  |
| H | 2.08326  | 4.26576  | 0.90036  |
| H | 3.93828  | 3.11891  | 0.09459  |
| H | -0.34346 | 4.39650  | 1.44926  |
| C | -2.90468 | 1.08549  | -0.97634 |
| H | -3.26808 | 1.72343  | -0.16216 |
| C | -2.80445 | -2.20624 | 0.88995  |
| H | -2.15153 | -2.84062 | 0.28113  |
| H | -3.01833 | -2.74260 | 1.82284  |
| H | -3.75255 | -2.09452 | 0.35437  |
| C | -3.04079 | 0.00869  | 2.09263  |
| H | -3.98702 | 0.26718  | 1.60568  |
| H | -3.28821 | -0.54052 | 3.01017  |
| H | -2.54639 | 0.93707  | 2.39335  |
| C | -4.07714 | 0.22205  | -1.45489 |
| H | -3.76314 | -0.50053 | -2.21789 |
| H | -4.54766 | -0.33215 | -0.63832 |
| H | -4.84816 | 0.86070  | -1.90318 |
| C | -2.40513 | 1.97071  | -2.12168 |
| H | -2.03500 | 1.36487  | -2.95779 |
| H | -3.22595 | 2.59113  | -2.50177 |
| H | -1.59844 | 2.64149  | -1.81193 |
| I | 1.13435  | -2.17053 | -0.08199 |

#### CuI profile compound 2 in CH<sub>3</sub>CN

Sum of electronic and zero-point Energies= -1182.963755  
 Sum of electronic and thermal Enthalpies = -1182.938538  
 Sum of electronic and thermal Free Energies = -1183.027078

|    |          |          |          |
|----|----------|----------|----------|
| C  | 3.90487  | 2.66027  | 1.40358  |
| C  | 2.96012  | 2.41173  | 2.38759  |
| C  | 2.14129  | 1.24704  | 2.32611  |
| C  | 2.40513  | 0.43319  | 1.21311  |
| C  | 4.14281  | 1.80157  | 0.28646  |
| C  | 1.11198  | 0.74287  | 3.16718  |
| C  | 0.46418  | -0.44674 | 2.85030  |
| H  | 0.82046  | 1.28760  | 4.06417  |
| H  | 4.51133  | 3.55737  | 1.48750  |
| H  | 2.84160  | 3.11461  | 3.20895  |
| H  | 4.90344  | 2.05810  | -0.44498 |
| H  | -0.31519 | -0.80032 | 3.52189  |
| C  | 0.75942  | -1.24109 | 1.70268  |
| H  | 0.20835  | -2.15772 | 1.51855  |
| C  | 1.75475  | -0.77296 | 0.88499  |
| I  | -3.68383 | -1.81302 | 0.44406  |
| C  | 3.36581  | 0.67330  | 0.21156  |
| C  | 1.98942  | -0.59388 | -2.22198 |
| H  | 1.26330  | 0.19737  | -1.99625 |
| C  | 4.00425  | -2.28335 | -0.65437 |
| H  | 4.25795  | -2.38253 | -1.71416 |
| P  | 2.81664  | -0.87104 | -0.60217 |
| Cu | -2.59177 | 0.37378  | -0.16064 |
| I  | -1.51845 | 2.53018  | -0.88357 |
| C  | 3.30227  | -3.56837 | -0.17973 |
| H  | 2.37992  | -3.77925 | -0.72536 |
| H  | 3.98354  | -4.40940 | -0.33600 |
| H  | 3.07402  | -3.51145 | 0.88988  |
| C  | 5.26614  | -1.97883 | 0.15508  |
| H  | 5.94207  | -2.83589 | 0.08814  |
| H  | 5.79566  | -1.10178 | -0.23262 |
| H  | 5.03914  | -1.81181 | 1.20986  |
| C  | 1.25431  | -1.84159 | -2.70801 |
| H  | 0.68958  | -1.58548 | -3.61097 |
| H  | 1.95007  | -2.64269 | -2.96400 |
| H  | 0.53915  | -2.22018 | -1.96619 |
| C  | 3.00585  | -0.07019 | -3.23856 |
| H  | 3.51766  | 0.83533  | -2.88675 |
| H  | 3.75813  | -0.82183 | -3.48221 |
| H  | 2.47700  | 0.18859  | -4.16050 |

#### CuI profile compound I in CH<sub>3</sub>CN

Sum of electronic and zero-point Energies= -1182.948621  
 Sum of electronic and thermal Enthalpies = -1182.925031  
 Sum of electronic and thermal Free Energies = -1183.003099

|    |          |          |          |
|----|----------|----------|----------|
| C  | 4.25793  | 0.81864  | -1.52070 |
| C  | 4.25101  | -0.51769 | -1.81486 |
| C  | 3.22180  | -1.36377 | -1.32564 |
| C  | 2.17485  | -0.82901 | -0.48394 |
| C  | 3.16196  | 1.37144  | -0.82840 |
| C  | 3.25739  | -2.73802 | -1.67061 |
| C  | 2.32281  | -3.61167 | -1.17894 |
| H  | 4.05020  | -3.08069 | -2.32999 |
| H  | 5.05849  | 1.46548  | -1.86681 |
| H  | 5.03521  | -0.96283 | -2.42152 |
| H  | 3.13255  | 2.45013  | -0.72325 |
| H  | 2.33369  | -4.66204 | -1.45369 |
| C  | 1.38187  | -3.14910 | -0.23891 |
| H  | 0.71824  | -3.86162 | 0.23925  |
| C  | 1.33531  | -1.81796 | 0.11975  |
| I  | 0.11547  | -1.46598 | 1.86384  |
| C  | 2.10788  | 0.60921  | -0.34924 |
| C  | 0.90521  | 2.17418  | 1.87434  |
| H  | 1.35102  | 1.29428  | 2.35298  |
| C  | 0.56187  | 3.03202  | -1.01351 |
| H  | 1.48331  | 3.60767  | -0.87160 |
| P  | 0.57745  | 1.54814  | 0.13023  |
| Cu | -1.28810 | 0.39232  | -0.15249 |
| I  | -3.49387 | -0.55610 | -0.97072 |
| C  | -0.62450 | 3.93411  | -0.65922 |
| H  | -1.57147 | 3.38195  | -0.69362 |
| H  | -0.52650 | 4.38540  | 0.33126  |
| H  | -0.68840 | 4.75035  | -1.38814 |
| C  | 0.46575  | 2.57380  | -2.47043 |
| H  | 1.31726  | 1.95944  | -2.77578 |
| H  | -0.44997 | 1.99367  | -2.63724 |
| H  | 0.43174  | 3.44916  | -3.12921 |
| C  | -0.39814 | 2.49223  | 2.61229  |
| H  | -1.10643 | 1.65861  | 2.56019  |
| H  | -0.18263 | 2.68604  | 3.66967  |
| H  | -0.89314 | 3.38129  | 2.21029  |
| C  | 1.90908  | 3.32373  | 1.95859  |
| H  | 2.10082  | 3.55836  | 3.01235  |
| H  | 2.86969  | 3.06893  | 1.50167  |
| H  | 1.53191  | 4.23452  | 1.48285  |

#### CuI profile TS1 in CH<sub>3</sub>CN

Sum of electronic and zero-point Energies= -1182.934934  
 Sum of electronic and thermal Enthalpies = -1182.910967  
 Sum of electronic and thermal Free Energies = -1182.990687

|    |          |          |          |
|----|----------|----------|----------|
| C  | 0.63688  | -2.59517 | -1.09423 |
| C  | 0.83587  | -1.39953 | -0.42924 |
| C  | 2.08615  | -0.70409 | -0.49997 |
| C  | 3.17874  | -1.37784 | -1.13237 |
| C  | 2.95148  | -2.61444 | -1.79767 |
| C  | 1.69433  | -3.16695 | -1.84332 |
| H  | -0.29886 | -3.13459 | -0.99623 |
| C  | 2.24640  | 0.64503  | -0.08213 |
| C  | 4.44635  | -0.74467 | -1.14770 |
| H  | 3.78881  | -3.10404 | -2.28751 |
| H  | 1.51434  | -4.09278 | -2.38187 |
| C  | 4.61196  | 0.51742  | -0.62212 |
| C  | 3.49802  | 1.23515  | -0.13823 |
| H  | 5.28009  | -1.26246 | -1.61483 |
| H  | 5.58782  | 0.99374  | -0.64111 |
| H  | 3.62753  | 2.27556  | 0.14380  |
| I  | -0.24315 | -1.80042 | 1.81542  |
| C  | 0.63514  | 2.08192  | 1.98722  |
| H  | 0.97154  | 1.16996  | 2.49684  |
| C  | 0.86133  | 3.05521  | -0.89940 |
| H  | 1.79082  | 3.54896  | -0.58825 |
| Cu | -0.77368 | -0.21633 | -0.31966 |
| I  | -3.30907 | 0.01421  | -0.99425 |
| P  | 0.67485  | 1.55326  | 0.19084  |
| C  | -0.30761 | 4.02845  | -0.73146 |
| H  | -0.18137 | 4.86543  | -1.42774 |
| H  | -1.26523 | 3.54785  | -0.96096 |
| H  | -0.36505 | 4.44401  | 0.27753  |
| C  | 0.99526  | 2.61462  | -2.35972 |
| H  | 1.85421  | 1.95704  | -2.52147 |

|   |          |         |          |
|---|----------|---------|----------|
| H | 0.09392  | 2.09128 | -2.69929 |
| H | 1.12842  | 3.49735 | -2.99524 |
| C | -0.79690 | 2.37107 | 2.44878  |
| H | -1.47294 | 1.54233 | 2.21560  |
| H | -0.80588 | 2.51814 | 3.53482  |
| H | -1.20158 | 3.27821 | 1.99047  |
| C | 1.59649  | 3.21719 | 2.34051  |
| H | 1.55474  | 3.40126 | 3.42074  |
| H | 2.63264  | 2.97486 | 2.08894  |
| H | 1.32840  | 4.15153 | 1.83764  |

**CuI profile compound II in CH<sub>3</sub>CN**

Sum of electronic and zero-point Energies= -1182.949951

Sum of electronic and thermal Enthalpies = -1182.925401

Sum of electronic and thermal Free Energies = -1183.005378

|    |          |          |          |
|----|----------|----------|----------|
| C  | 4.97860  | 0.28815  | 0.02881  |
| C  | 4.87661  | -1.02926 | -0.36222 |
| C  | 3.61132  | -1.64551 | -0.53556 |
| C  | 2.44116  | -0.86583 | -0.27476 |
| C  | 3.82137  | 1.06403  | 0.26329  |
| C  | 3.45153  | -2.97361 | -1.00419 |
| C  | 2.19324  | -3.48485 | -1.21463 |
| H  | 4.33522  | -3.57300 | -1.20663 |
| H  | 5.95578  | 0.74682  | 0.14760  |
| H  | 5.77186  | -1.61042 | -0.56868 |
| H  | 3.92971  | 2.10518  | 0.55056  |
| H  | 2.06874  | -4.49791 | -1.58785 |
| C  | 1.02934  | -2.72032 | -0.93257 |
| H  | 0.05934  | -3.17865 | -1.08291 |
| C  | 1.15390  | -1.42737 | -0.47263 |
| I  | -2.41435 | 1.27613  | -1.05609 |
| C  | 2.57573  | 0.48265  | 0.12479  |
| C  | 0.68756  | 1.29667  | 2.23679  |
| H  | 0.93812  | 0.26201  | 2.50548  |
| C  | 1.12486  | 2.96050  | -0.35198 |
| H  | 2.09576  | 3.26835  | 0.06475  |
| P  | 0.95983  | 1.26418  | 0.39118  |
| Cu | -0.47715 | -0.34897 | -0.34158 |
| I  | -2.05148 | -2.24936 | 0.79362  |
| C  | 0.08350  | 3.99281  | 0.07004  |
| H  | 0.04080  | 4.12365  | 1.15334  |
| H  | 0.36198  | 4.95662  | -0.37092 |
| H  | -0.91342 | 3.73181  | -0.29148 |
| C  | 1.26095  | 2.85761  | -1.87304 |
| H  | 0.31651  | 2.55134  | -2.33285 |
| H  | 1.52910  | 3.84167  | -2.27186 |
| H  | 2.04083  | 2.15218  | -2.17503 |
| C  | -0.76139 | 1.56344  | 2.64511  |
| H  | -0.83762 | 1.46174  | 3.73321  |
| H  | -1.08685 | 2.57297  | 2.38085  |
| H  | -1.45029 | 0.84626  | 2.19152  |
| C  | 1.67517  | 2.23644  | 2.93649  |
| H  | 1.48031  | 3.28625  | 2.70004  |
| H  | 1.55792  | 2.11112  | 4.01870  |
| H  | 2.71486  | 2.00735  | 2.68878  |

**CuI profile TS2 in CH<sub>3</sub>CN**

Sum of electronic and zero-point Energies= -1182.937307

Sum of electronic and thermal Enthalpies = -1182.913189

Sum of electronic and thermal Free Energies = -1182.995212

|   |          |          |          |
|---|----------|----------|----------|
| C | -4.73085 | 0.89580  | 0.19887  |
| C | -4.45641 | 1.10717  | -1.14322 |
| C | -3.20476 | 0.72373  | -1.69443 |
| C | -2.28115 | 0.20415  | -0.76846 |
| C | -3.81412 | 0.26944  | 1.08692  |
| C | -2.77398 | 0.74618  | -3.04747 |
| C | -1.54930 | 0.20398  | -3.39488 |
| H | -3.42306 | 1.15510  | -3.81679 |
| H | -5.70134 | 1.19010  | 0.58790  |
| H | -5.21229 | 1.55249  | -1.78442 |
| H | -4.10718 | 0.05844  | 2.10968  |
| H | -1.25115 | 0.19455  | -4.43957 |
| C | -0.64581 | -0.35830 | -2.44707 |
| H | 0.29102  | -0.78868 | -2.78532 |

|    |          |          |          |
|----|----------|----------|----------|
| C  | -0.99656 | -0.26860 | -1.11261 |
| I  | 3.12748  | -0.91121 | -0.81681 |
| C  | -2.58067 | -0.06365 | 0.57582  |
| C  | -0.37501 | -0.67425 | 2.57865  |
| H  | -0.36268 | 0.42196  | 2.59058  |
| C  | -1.33906 | -2.85490 | 0.64968  |
| H  | -1.52423 | -3.21608 | 1.66893  |
| P  | -1.07731 | -1.03354 | 0.88296  |
| Cu | 0.75155  | 0.12156  | -0.19307 |
| I  | 0.91805  | 2.70304  | 0.67131  |
| C  | -0.06407 | -3.50666 | 0.10524  |
| H  | 0.81498  | -3.29908 | 0.71971  |
| H  | -0.21161 | -4.59147 | 0.08453  |
| H  | 0.13911  | -3.17145 | -0.91630 |
| C  | -2.55606 | -3.16951 | -0.21815 |
| H  | -2.67380 | -4.25739 | -0.25914 |
| H  | -3.47767 | -2.74656 | 0.18929  |
| H  | -2.42720 | -2.81096 | -1.24386 |
| C  | 1.03396  | -1.20391 | 2.82308  |
| H  | 1.35753  | -0.87650 | 3.81692  |
| H  | 1.06517  | -2.29721 | 2.80354  |
| H  | 1.74569  | -0.81813 | 2.08820  |
| C  | -1.37585 | -1.18212 | 3.62592  |
| H  | -2.39480 | -0.82106 | 3.46420  |
| H  | -1.39084 | -2.27423 | 3.68036  |
| H  | -1.04581 | -0.80413 | 4.60027  |

▪ **X : Br, gas phase**

**CuBr profile compound 1 in GAS phase**

Sum of electronic and zero-point Energies= -3534.227323

Sum of electronic and thermal Enthalpies = -3534.207469

Sum of electronic and thermal Free Energies = -3534.274328

|    |          |          |          |
|----|----------|----------|----------|
| P  | -1.43017 | -0.09250 | -0.41660 |
| C  | -1.88830 | -0.83759 | 1.27171  |
| H  | -0.90480 | -1.13061 | 1.65936  |
| C  | 1.90344  | -0.75515 | -0.21887 |
| C  | 1.39894  | 0.56092  | 0.02905  |
| C  | 3.24821  | -1.03085 | -0.34907 |
| C  | 0.01445  | 0.97817  | 0.10945  |
| C  | 2.42237  | 1.56372  | 0.22516  |
| C  | 4.21042  | -0.01706 | -0.21409 |
| H  | 3.55751  | -2.05254 | -0.53911 |
| C  | -0.24593 | 2.28962  | 0.47625  |
| C  | 2.06938  | 2.89220  | 0.57064  |
| C  | 3.79771  | 1.25358  | 0.08779  |
| H  | 5.26383  | -0.25525 | -0.32458 |
| C  | 0.75804  | 3.24614  | 0.72063  |
| H  | -1.27463 | 2.61889  | 0.56272  |
| H  | 2.86674  | 3.61562  | 0.71879  |
| H  | 4.52007  | 2.05227  | 0.23284  |
| H  | 0.48139  | 4.25758  | 1.00429  |
| C  | -2.78846 | 1.16585  | -0.77117 |
| H  | -2.95655 | 1.84665  | 0.07326  |
| C  | -2.69723 | -2.12724 | 1.10215  |
| H  | -2.18074 | -2.83056 | 0.44213  |
| H  | -2.83827 | -2.61725 | 2.07315  |
| H  | -3.69042 | -1.94468 | 0.68112  |
| C  | -2.52532 | 0.12148  | 2.27458  |
| H  | -3.52574 | 0.43930  | 1.96151  |
| H  | -2.63415 | -0.36884 | 3.24986  |
| H  | -1.91438 | 1.01688  | 2.42387  |
| C  | -4.09932 | 0.41018  | -1.02457 |
| H  | -3.97455 | -0.35630 | -1.79772 |
| H  | -4.48037 | -0.07869 | -0.12425 |
| H  | -4.87154 | 1.10775  | -1.36999 |
| C  | -2.41344 | 1.97907  | -2.01528 |
| H  | -2.26426 | 1.31830  | -2.87646 |
| H  | -3.21787 | 2.68002  | -2.26834 |
| H  | -1.49511 | 2.55610  | -1.87796 |
| Br | 0.79990  | -2.30416 | -0.32290 |

**CuBr profile compound 2 in GAS phase**

Sum of electronic and zero-point Energies= -6303.428174  
 Sum of electronic and thermal Enthalpies = -6303.403914  
 Sum of electronic and thermal Free Energies = -6303.484194

|    |          |          |          |
|----|----------|----------|----------|
| C  | 4.64411  | -1.51264 | 0.30669  |
| C  | 4.18309  | -1.99218 | -0.91204 |
| C  | 2.95535  | -1.52283 | -1.45350 |
| C  | 2.31267  | -0.57724 | -0.64757 |
| C  | 3.95555  | -0.54364 | 1.09594  |
| C  | 2.25117  | -1.82442 | -2.65090 |
| C  | 1.04517  | -1.19658 | -2.93399 |
| H  | 2.65044  | -2.55148 | -3.35277 |
| H  | 5.58551  | -1.89767 | 0.68827  |
| H  | 4.77035  | -2.73375 | -1.44682 |
| H  | 4.37704  | -0.21618 | 2.04086  |
| H  | 0.53410  | -1.45555 | -3.85676 |
| C  | 0.41769  | -0.23585 | -2.08589 |
| H  | -0.54015 | 0.21339  | -2.33414 |
| C  | 1.08532  | 0.05267  | -0.92264 |
| Br | -2.71636 | 1.35009  | -1.25528 |
| C  | 2.76625  | -0.07999 | 0.58899  |
| C  | 0.14768  | 0.57810  | 2.08230  |
| H  | -0.28450 | -0.40499 | 1.82947  |
| C  | 1.50115  | 2.77687  | 0.45391  |
| H  | 1.19258  | 3.20789  | 1.41441  |
| P  | 1.25010  | 0.95680  | 0.65932  |
| Cu | -2.38760 | -0.52127 | -0.09507 |
| Br | -1.95195 | -2.33384 | 1.08714  |
| C  | 0.57072  | 3.28874  | -0.65825 |
| H  | -0.44605 | 2.88268  | -0.61238 |
| H  | 0.51052  | 4.37978  | -0.60059 |
| H  | 0.97812  | 3.02254  | -1.63835 |
| C  | 2.96718  | 3.13154  | 0.19043  |
| H  | 3.33402  | 2.65898  | -0.72580 |
| H  | 3.05299  | 4.21515  | 0.06210  |
| H  | 3.62401  | 2.83565  | 1.01297  |
| C  | -0.99534 | 1.58539  | 2.24208  |
| H  | -1.67112 | 1.20289  | 3.01306  |
| H  | -0.63787 | 2.56780  | 2.56938  |
| H  | -1.58542 | 1.69717  | 1.32760  |
| C  | 1.00016  | 0.45666  | 3.35301  |
| H  | 1.75451  | -0.33010 | 3.27195  |
| H  | 1.49613  | 1.39890  | 3.61498  |
| H  | 0.33699  | 0.19575  | 4.18316  |

**CuBr profile compound I in GAS phase**

Sum of electronic and zero-point Energies= -6303.441459  
 Sum of electronic and thermal Enthalpies = -6303.417458  
 Sum of electronic and thermal Free Energies = -6303.495818

|    |          |          |          |
|----|----------|----------|----------|
| C  | 3.71909  | 1.77090  | -1.09120 |
| C  | 4.19996  | 0.49522  | -1.19609 |
| C  | 3.43978  | -0.60782 | -0.73186 |
| C  | 2.14759  | -0.39515 | -0.12501 |
| C  | 2.41341  | 1.97362  | -0.60349 |
| C  | 3.98436  | -1.90922 | -0.85969 |
| C  | 3.31569  | -3.00520 | -0.38020 |
| H  | 4.95004  | -2.01673 | -1.34553 |
| H  | 4.30920  | 2.62037  | -1.42119 |
| H  | 5.17774  | 0.30113  | -1.62857 |
| H  | 2.02702  | 2.98622  | -0.62341 |
| H  | 3.72405  | -4.00467 | -0.49079 |
| C  | 2.10820  | -2.81996 | 0.31367  |
| H  | 1.60553  | -3.66614 | 0.76836  |
| C  | 1.56593  | -1.56176 | 0.45876  |
| Br | 0.06150  | -1.49623 | 1.62167  |
| C  | 1.60092  | 0.94173  | -0.16224 |
| C  | -0.22805 | 1.95817  | 1.89929  |
| H  | 0.38376  | 1.19641  | 2.39642  |
| C  | -0.51617 | 2.83565  | -0.98982 |
| H  | 0.17688  | 3.64842  | -0.74217 |
| P  | -0.19078 | 1.36036  | 0.11477  |
| Cu | -1.59656 | -0.24801 | -0.38803 |
| Br | -3.11201 | -1.71048 | -1.02031 |
| C  | -1.94525 | 3.34073  | -0.75296 |
| H  | -2.67731 | 2.53589  | -0.88327 |

|   |          |         |          |
|---|----------|---------|----------|
| H | -2.08109 | 3.76871 | 0.24335  |
| H | -2.17869 | 4.12458 | -1.48180 |
| C | -0.33555 | 2.43511 | -2.45824 |
| H | 0.67401  | 2.07857 | -2.67748 |
| H | -1.04020 | 1.64193 | -2.73127 |
| H | -0.53736 | 3.29777 | -3.10274 |
| C | -1.63348 | 1.88007 | 2.50342  |
| H | -2.07755 | 0.88979 | 2.36347  |
| H | -1.58264 | 2.07812 | 3.57995  |
| H | -2.31705 | 2.61258 | 2.06568  |
| C | 0.42995  | 3.32012 | 2.11478  |
| H | 0.46857  | 3.54545 | 3.18633  |
| H | 1.45728  | 3.34181 | 1.73949  |
| H | -0.13067 | 4.12843 | 1.63415  |

**CuBr profile TS1 in GAS phase**

Sum of electronic and zero-point Energies= -6303.412012  
 Sum of electronic and thermal Enthalpies = -6303.388374  
 Sum of electronic and thermal Free Energies = -6303.465369

|    |          |          |          |
|----|----------|----------|----------|
| C  | 1.53424  | -2.47246 | -0.60703 |
| C  | 1.13235  | -1.22926 | -0.15806 |
| C  | 2.03995  | -0.12332 | -0.14694 |
| C  | 3.40571  | -0.36597 | -0.48880 |
| C  | 3.79129  | -1.65687 | -0.93990 |
| C  | 2.86196  | -2.66201 | -1.05778 |
| H  | 0.85429  | -3.31669 | -0.56891 |
| C  | 1.59645  | 1.20613  | 0.07400  |
| C  | 4.30979  | 0.72371  | -0.44645 |
| H  | 4.82889  | -1.82986 | -1.21191 |
| H  | 3.15271  | -3.63890 | -1.43265 |
| C  | 3.87772  | 1.99547  | -0.14224 |
| C  | 2.50693  | 2.24759  | 0.07379  |
| H  | 5.35330  | 0.54485  | -0.69292 |
| H  | 4.58407  | 2.82011  | -0.12149 |
| H  | 2.17315  | 3.27312  | 0.20184  |
| Br | -0.09102 | -1.79727 | 1.81092  |
| C  | -0.71974 | 1.86757  | 1.81605  |
| H  | -0.12131 | 1.17386  | 2.42060  |
| C  | -0.62395 | 2.68674  | -1.14316 |
| H  | -0.07542 | 3.59045  | -0.84267 |
| Cu | -0.78164 | -0.85287 | -0.32150 |
| Br | -2.88566 | -1.14893 | -1.11069 |
| P  | -0.22700 | 1.34822  | 0.08815  |
| C  | -2.12725 | 2.98385  | -1.16402 |
| H  | -2.34740 | 3.68617  | -1.97546 |
| H  | -2.70560 | 2.07089  | -1.34077 |
| H  | -2.47520 | 3.43877  | -0.23329 |
| C  | -0.13914 | 2.24009  | -2.52746 |
| H  | 0.93373  | 2.02923  | -2.54531 |
| H  | -0.67343 | 1.34059  | -2.85094 |
| H  | -0.33897 | 3.03088  | -3.25866 |
| C  | -2.19591 | 1.57278  | 2.10734  |
| H  | -2.45985 | 0.54141  | 1.86036  |
| H  | -2.38695 | 1.72468  | 3.17533  |
| H  | -2.86843 | 2.23344  | 1.55402  |
| C  | -0.32840 | 3.30252  | 2.17098  |
| H  | -0.57975 | 3.50220  | 3.21866  |
| H  | 0.74473  | 3.47691  | 2.05333  |
| H  | -0.86833 | 4.03504  | 1.56226  |

**CuBr profile compound II in GAS phase**

Sum of electronic and zero-point Energies= -6303.431159  
 Sum of electronic and thermal Enthalpies = -6303.407539  
 Sum of electronic and thermal Free Energies = -6303.483704

|   |         |          |          |
|---|---------|----------|----------|
| C | 4.28976 | 1.33022  | -0.64318 |
| C | 4.57316 | 0.00078  | -0.43016 |
| C | 3.54891 | -0.93378 | -0.13375 |
| C | 2.19438 | -0.47084 | -0.08716 |
| C | 2.96214 | 1.79918  | -0.54003 |
| C | 3.80833 | -2.30456 | 0.10122  |
| C | 2.76835 | -3.16070 | 0.36728  |
| H | 4.83355 | -2.66405 | 0.06892  |
| H | 5.08698 | 2.02878  | -0.87894 |
| H | 5.59818 | -0.35587 | -0.49562 |

|    |          |          |          |
|----|----------|----------|----------|
| H  | 2.76574  | 2.85839  | -0.67939 |
| H  | 2.96272  | -4.21303 | 0.55664  |
| C  | 1.42590  | -2.70908 | 0.37887  |
| H  | 0.62958  | -3.42423 | 0.54739  |
| C  | 1.12284  | -1.38704 | 0.13249  |
| Br | -2.76331 | 0.45045  | -0.23629 |
| C  | 1.94224  | 0.91285  | -0.25531 |
| C  | 0.18310  | 1.90008  | 1.84295  |
| H  | 0.71856  | 1.07502  | 2.33323  |
| C  | -0.21088 | 2.64374  | -1.15971 |
| H  | 0.72568  | 3.21832  | -1.18429 |
| P  | 0.19588  | 1.30290  | 0.07000  |
| Cu | -0.73708 | -0.72470 | -0.02100 |
| Br | -1.73340 | -2.77259 | -0.01307 |
| C  | -1.34670 | 3.59671  | -0.78780 |
| H  | -1.15474 | 4.13475  | 0.14388  |
| H  | -1.45269 | 4.34231  | -1.58360 |
| H  | -2.28721 | 3.05366  | -0.68982 |
| C  | -0.42153 | 2.00392  | -2.53685 |
| H  | -1.34654 | 1.42111  | -2.54035 |
| H  | -0.50063 | 2.78925  | -3.29569 |
| H  | 0.40883  | 1.34817  | -2.81728 |
| C  | -1.20499 | 2.01159  | 2.47782  |
| H  | -1.08090 | 2.22134  | 3.54590  |
| H  | -1.78853 | 2.82600  | 2.04144  |
| H  | -1.78675 | 1.09553  | 2.36695  |
| C  | 1.00691  | 3.17891  | 2.03095  |
| H  | 0.54591  | 4.03922  | 1.53690  |
| H  | 1.06227  | 3.40943  | 3.10022  |
| H  | 2.03068  | 3.07161  | 1.66443  |

#### CuBr profile compound TS2 in GAS phase

Sum of electronic and zero-point Energies= -6303.396435  
 Sum of electronic and thermal Enthalpies = -6303.372805  
 Sum of electronic and thermal Free Energies = -6303.449669

|    |          |          |          |
|----|----------|----------|----------|
| C  | 4.19637  | 1.22206  | 0.51512  |
| C  | 4.40149  | -0.01522 | -0.07197 |
| C  | 3.30708  | -0.77546 | -0.56069 |
| C  | 2.03998  | -0.19809 | -0.35043 |
| C  | 2.90871  | 1.80776  | 0.64841  |
| C  | 3.31038  | -2.02135 | -1.24200 |
| C  | 2.12505  | -2.56515 | -1.69963 |
| H  | 4.24815  | -2.53954 | -1.42219 |
| H  | 5.05553  | 1.77922  | 0.87747  |
| H  | 5.41215  | -0.40431 | -0.16365 |
| H  | 2.81245  | 2.79693  | 1.08394  |
| H  | 2.15043  | -3.50827 | -2.23878 |
| C  | 0.85319  | -1.95014 | -1.50373 |
| H  | -0.04898 | -2.40978 | -1.89431 |
| C  | 0.83448  | -0.78792 | -0.76808 |
| Br | -2.74421 | -1.00748 | -1.11963 |
| C  | 1.83335  | 1.07315  | 0.20425  |
| C  | -0.77082 | 2.08366  | 1.31058  |
| H  | -0.24907 | 1.61326  | 2.15361  |
| C  | -0.21880 | 2.12173  | -1.69129 |
| H  | 0.30064  | 3.06402  | -1.46214 |
| P  | 0.03611  | 1.15630  | -0.11440 |
| Cu | -0.92959 | -0.84309 | 0.29739  |
| Br | -0.27453 | -1.21952 | 2.48167  |
| C  | -1.69243 | 2.41808  | -1.99063 |
| H  | -2.16048 | 3.03504  | -1.22055 |
| H  | -1.75186 | 2.96906  | -2.93521 |
| H  | -2.26591 | 1.49200  | -2.08607 |
| C  | 0.46827  | 1.46544  | -2.88933 |
| H  | 0.37787  | 2.13165  | -3.75373 |
| H  | 1.53162  | 1.28098  | -2.71788 |
| H  | -0.01417 | 0.51701  | -3.13999 |
| C  | -2.26976 | 1.86762  | 1.51336  |
| H  | -2.57794 | 2.44093  | 2.39479  |
| H  | -2.86941 | 2.20225  | 0.66447  |
| H  | -2.49950 | 0.81774  | 1.70614  |
| C  | -0.39874 | 3.57027  | 1.22486  |
| H  | 0.67213  | 3.74070  | 1.08038  |
| H  | -0.94152 | 4.08774  | 0.42876  |
| H  | -0.67672 | 4.04488  | 2.17230  |

#### X : Br, DCM

##### CuBr profile compound 1 in DCM

Sum of electronic and zero-point Energies= -3534.247868  
 Sum of electronic and thermal Enthalpies = -3534.228083  
 Sum of electronic and thermal Free Energies = -3534.294368

|    |          |          |          |
|----|----------|----------|----------|
| P  | -1.42986 | -0.08335 | -0.42038 |
| C  | -1.95024 | -0.85989 | 1.23349  |
| H  | -0.98400 | -1.16674 | 1.65265  |
| C  | 1.91484  | -0.75558 | -0.22541 |
| C  | 1.40379  | 0.55418  | 0.04204  |
| C  | 3.25742  | -1.01921 | -0.39758 |
| C  | 0.01793  | 0.96168  | 0.15081  |
| C  | 2.42435  | 1.56251  | 0.22979  |
| C  | 4.21407  | 0.00393  | -0.28225 |
| H  | 3.57810  | -2.03531 | -0.60075 |
| C  | -0.24430 | 2.25977  | 0.56329  |
| C  | 2.06993  | 2.87980  | 0.61866  |
| C  | 3.79912  | 1.26737  | 0.04933  |
| H  | 5.26572  | -0.22473 | -0.42633 |
| C  | 0.75916  | 3.21647  | 0.81569  |
| H  | -1.27280 | 2.58174  | 0.67589  |
| H  | 2.86597  | 3.60556  | 0.76288  |
| H  | 4.51732  | 2.07126  | 0.18677  |
| H  | 0.48053  | 4.21651  | 1.13600  |
| C  | -2.76028 | 1.19618  | -0.79791 |
| H  | -2.93963 | 1.86106  | 0.05549  |
| C  | -2.76411 | -2.13763 | 1.01111  |
| H  | -2.23572 | -2.83772 | 0.35568  |
| H  | -2.94044 | -2.64516 | 1.96778  |
| H  | -3.74183 | -1.93718 | 0.56205  |
| C  | -2.61911 | 0.08466  | 2.22872  |
| H  | -3.60798 | 0.40939  | 1.88759  |
| H  | -2.75919 | -0.42320 | 3.19156  |
| H  | -2.01327 | 0.97692  | 2.41516  |
| C  | -4.07423 | 0.46573  | -1.10091 |
| H  | -3.94917 | -0.28169 | -1.89359 |
| H  | -4.48391 | -0.03921 | -0.22211 |
| H  | -4.82681 | 1.18623  | -1.44422 |
| C  | -2.34139 | 2.03071  | -2.01279 |
| H  | -2.18488 | 1.39204  | -2.89040 |
| H  | -3.12897 | 2.75155  | -2.26473 |
| H  | -1.41843 | 2.59242  | -1.84211 |
| Br | 0.81673  | -2.31621 | -0.27760 |

##### CuBr profile compound 2 in DCM

Sum of electronic and zero-point Energies= -6303.475416  
 Sum of electronic and thermal Enthalpies = -6303.451014  
 Sum of electronic and thermal Free Energies = -6303.533264

|    |          |          |          |
|----|----------|----------|----------|
| C  | 3.21072  | -2.98846 | 1.15524  |
| C  | 2.43818  | -3.48925 | 0.11528  |
| C  | 1.78446  | -2.60368 | -0.78539 |
| C  | 2.01250  | -1.25157 | -0.50997 |
| C  | 3.41179  | -1.59761 | 1.40672  |
| C  | 0.93995  | -2.82455 | -1.90813 |
| C  | 0.42002  | -1.74932 | -2.61767 |
| H  | 0.69138  | -3.83643 | -2.21637 |
| H  | 3.69174  | -3.69564 | 1.82535  |
| H  | 2.33406  | -4.56453 | -0.00171 |
| H  | 4.02510  | -1.27954 | 2.24348  |
| H  | -0.22418 | -1.95684 | -3.46746 |
| C  | 0.67221  | -0.38074 | -2.29881 |
| H  | 0.22316  | 0.40808  | -2.89304 |
| C  | 1.48882  | -0.15349 | -1.21919 |
| Br | -4.45505 | 0.45110  | -1.15306 |
| C  | 2.79155  | -0.73137 | 0.54135  |
| C  | 1.28089  | 1.88163  | 1.11931  |
| H  | 0.51798  | 1.14000  | 1.40091  |
| C  | 3.71132  | 1.97635  | -0.74507 |
| H  | 3.87863  | 2.75682  | 0.00773  |
| P  | 2.35041  | 0.94933  | -0.04018 |
| Cu | -2.96972 | -0.02891 | 0.40085  |
| Br | -1.49297 | -0.51835 | 1.97487  |

|   |          |         |          |
|---|----------|---------|----------|
| C | 3.25318  | 2.62534 | -2.05764 |
| H | 2.33181  | 3.20347 | -1.94782 |
| H | 4.03653  | 3.30833 | -2.40126 |
| H | 3.09758  | 1.87128 | -2.83506 |
| C | 4.99399  | 1.16107 | -0.92197 |
| H | 4.85334  | 0.33426 | -1.62519 |
| H | 5.77093  | 1.81658 | -1.32870 |
| H | 5.35784  | 0.75414 | 0.02516  |
| C | 0.59193  | 3.06901 | 0.44210  |
| H | -0.12225 | 3.50173 | 1.15018  |
| H | 1.30429  | 3.85225 | 0.16512  |
| H | 0.03056  | 2.76922 | -0.44773 |
| C | 2.07631  | 2.28618 | 2.36492  |
| H | 2.54264  | 1.42667 | 2.85609  |
| H | 2.85241  | 3.02339 | 2.13571  |
| H | 1.38592  | 2.74160 | 3.08228  |

#### CuBr profile compound I in DCM

Sum of electronic and zero-point Energies= -6303.475221

Sum of electronic and thermal Enthalpies = -6303.451034

Sum of electronic and thermal Free Energies = -6303.530371

|    |          |          |          |
|----|----------|----------|----------|
| C  | 3.77034  | 1.69534  | -1.04391 |
| C  | 4.21077  | 0.40601  | -1.17076 |
| C  | 3.41375  | -0.67865 | -0.72258 |
| C  | 2.12911  | -0.43094 | -0.11204 |
| C  | 2.46759  | 1.93397  | -0.56226 |
| C  | 3.91732  | -1.99631 | -0.86340 |
| C  | 3.21854  | -3.07531 | -0.38604 |
| H  | 4.87751  | -2.12852 | -1.35422 |
| H  | 4.38881  | 2.53139  | -1.35624 |
| H  | 5.18216  | 0.18605  | -1.60539 |
| H  | 2.11635  | 2.95943  | -0.56947 |
| H  | 3.59595  | -4.08649 | -0.50216 |
| C  | 2.02312  | -2.85769 | 0.32185  |
| H  | 1.51034  | -3.69416 | 0.78426  |
| C  | 1.52097  | -1.58371 | 0.47186  |
| Br | 0.03979  | -1.46238 | 1.67001  |
| C  | 1.62040  | 0.92078  | -0.14139 |
| C  | -0.23598 | 2.03284  | 1.86813  |
| H  | 0.35793  | 1.28411  | 2.40549  |
| C  | -0.44346 | 2.82403  | -1.06069 |
| H  | 0.27344  | 3.62091  | -0.83579 |
| P  | -0.16374 | 1.38721  | 0.10325  |
| Cu | -1.59316 | -0.22482 | -0.37836 |
| Br | -3.11583 | -1.72184 | -1.01169 |
| C  | -1.85559 | 3.38357  | -0.85744 |
| H  | -2.61701 | 2.60218  | -0.96676 |
| H  | -1.98428 | 3.85228  | 0.12153  |
| H  | -2.05363 | 4.14850  | -1.61699 |
| C  | -0.25790 | 2.36381  | -2.50942 |
| H  | 0.74204  | 1.96613  | -2.70340 |
| H  | -0.98656 | 1.58614  | -2.76721 |
| H  | -0.42069 | 3.21006  | -3.18650 |
| C  | -1.65644 | 1.98950  | 2.43741  |
| H  | -2.11158 | 0.99984  | 2.32286  |
| H  | -1.62828 | 2.22158  | 3.50837  |
| H  | -2.31887 | 2.71659  | 1.95893  |
| C  | 0.42593  | 3.39616  | 2.05882  |
| H  | 0.43683  | 3.64851  | 3.12551  |
| H  | 1.46331  | 3.40091  | 1.71140  |
| H  | -0.11560 | 4.19343  | 1.53937  |

#### CuBr profile TS1 in DCM

Sum of electronic and zero-point Energies= -6303.444566

Sum of electronic and thermal Enthalpies = -6303.420888

Sum of electronic and thermal Free Energies = -6303.497857

|   |         |          |          |
|---|---------|----------|----------|
| C | 1.05198 | -2.68248 | -0.51504 |
| C | 0.89277 | -1.36564 | -0.13868 |
| C | 1.98006 | -0.44458 | -0.14348 |
| C | 3.28011 | -0.95019 | -0.45887 |
| C | 3.42242 | -2.30766 | -0.85539 |
| C | 2.32571 | -3.13163 | -0.94286 |
| H | 0.22875 | -3.38622 | -0.45670 |
| C | 1.78708 | 0.94854  | 0.03550  |

|    |          |          |          |
|----|----------|----------|----------|
| C  | 4.37054  | -0.04541 | -0.44420 |
| H  | 4.41242  | -2.67882 | -1.10586 |
| H  | 2.43186  | -4.16132 | -1.27172 |
| C  | 4.17680  | 1.29365  | -0.18318 |
| C  | 2.87557  | 1.80278  | 0.01455  |
| H  | 5.36317  | -0.42176 | -0.67810 |
| H  | 5.02191  | 1.97583  | -0.18141 |
| H  | 2.73769  | 2.87506  | 0.11659  |
| Br | -0.46744 | -1.65648 | 1.89018  |
| C  | -0.35248 | 2.09353  | 1.75485  |
| H  | 0.13402  | 1.34485  | 2.39276  |
| C  | -0.09300 | 2.80664  | -1.21243 |
| H  | 0.64717  | 3.56141  | -0.91524 |
| Cu | -0.92258 | -0.65949 | -0.28788 |
| Br | -3.02955 | -0.96892 | -1.13648 |
| P  | 0.02424  | 1.43687  | 0.04425  |
| C  | -1.48142 | 3.44956  | -1.23267 |
| H  | -1.51691 | 4.20144  | -2.02913 |
| H  | -2.26489 | 2.71271  | -1.43800 |
| H  | -1.72173 | 3.95420  | -0.29370 |
| C  | 0.28055  | 2.25553  | -2.59169 |
| H  | 1.28907  | 1.83240  | -2.61205 |
| H  | -0.42340 | 1.47863  | -2.91060 |
| H  | 0.24405  | 3.06405  | -3.33046 |
| C  | -1.85259 | 2.06562  | 2.06422  |
| H  | -2.27876 | 1.06822  | 1.92476  |
| H  | -2.00756 | 2.35009  | 3.11128  |
| H  | -2.41795 | 2.76613  | 1.44342  |
| C  | 0.27328  | 3.46007  | 2.04029  |
| H  | 0.08072  | 3.73223  | 3.08467  |
| H  | 1.35731  | 3.45508  | 1.89734  |
| H  | -0.15548 | 4.24692  | 1.41181  |

#### CuBr profile compound II in DCM

Sum of electronic and zero-point Energies= -6303.464523

Sum of electronic and thermal Enthalpies = -6303.440934

Sum of electronic and thermal Free Energies = -6303.516803

|    |          |          |          |
|----|----------|----------|----------|
| C  | -4.29418 | -1.22769 | -0.79452 |
| C  | -4.56278 | 0.09230  | -0.51174 |
| C  | -3.52824 | 0.98797  | -0.13497 |
| C  | -2.18459 | 0.49597  | -0.09505 |
| C  | -2.97897 | -1.73276 | -0.67944 |
| C  | -3.76604 | 2.34537  | 0.19050  |
| C  | -2.71468 | 3.15928  | 0.53814  |
| H  | -4.78373 | 2.72625  | 0.16670  |
| H  | -5.09654 | -1.89708 | -1.09064 |
| H  | -5.57962 | 0.47122  | -0.57893 |
| H  | -2.80123 | -2.78767 | -0.86387 |
| H  | -2.89261 | 4.19836  | 0.80334  |
| C  | -1.37983 | 2.68168  | 0.53205  |
| H  | -0.57704 | 3.37360  | 0.75671  |
| C  | -1.09987 | 1.37548  | 0.18933  |
| Br | 2.79549  | -0.47179 | -0.16133 |
| C  | -1.95237 | -0.88183 | -0.32203 |
| C  | -0.29363 | -1.91438 | 1.83954  |
| H  | -0.86604 | -1.10184 | 2.30699  |
| C  | 0.21108  | -2.65677 | -1.14690 |
| H  | -0.72038 | -3.23977 | -1.16598 |
| P  | -0.23218 | -1.32191 | 0.07065  |
| Cu | 0.75180  | 0.69617  | 0.00097  |
| Br | 1.75309  | 2.77425  | -0.12469 |
| C  | 1.34626  | -3.60026 | -0.75495 |
| H  | 1.16652  | -4.09821 | 0.20094  |
| H  | 1.42926  | -4.37679 | -1.52390 |
| H  | 2.29487  | -3.06547 | -0.69602 |
| C  | 0.42466  | -2.03635 | -2.53046 |
| H  | 1.35423  | -1.45983 | -2.54970 |
| H  | 0.49836  | -2.83475 | -3.27653 |
| H  | -0.40042 | -1.37954 | -2.82447 |
| C  | 1.06493  | -2.00319 | 2.53465  |
| H  | 0.89363  | -2.23935 | 3.59084  |
| H  | 1.69165  | -2.79196 | 2.11105  |
| H  | 1.62012  | -1.06470 | 2.47958  |
| C  | -1.09904 | -3.21069 | 1.97534  |
| H  | -0.59293 | -4.05948 | 1.50670  |

|   |          |          |         |
|---|----------|----------|---------|
| H | -1.21084 | -3.43955 | 3.04096 |
| H | -2.10327 | -3.12473 | 1.55229 |

#### CuBr profile TS2 in DCM

Sum of electronic and zero-point Energies = -6303.434903  
 Sum of electronic and thermal Enthalpies = -6303.411269  
 Sum of electronic and thermal Free Energies = -6303.488329

|    |          |          |          |
|----|----------|----------|----------|
| C  | 4.31872  | 0.69910  | 0.84957  |
| C  | 4.41260  | -0.39723 | 0.00620  |
| C  | 3.26069  | -0.90304 | -0.65318 |
| C  | 2.05857  | -0.24780 | -0.32855 |
| C  | 3.09932  | 1.38987  | 1.09158  |
| C  | 3.15017  | -1.94190 | -1.61629 |
| C  | 1.93216  | -2.20215 | -2.21852 |
| H  | 4.02908  | -2.51187 | -1.90477 |
| H  | 5.22000  | 1.06612  | 1.33252  |
| H  | 5.37891  | -0.86568 | -0.16129 |
| H  | 3.09257  | 2.27544  | 1.71855  |
| H  | 1.87325  | -2.97700 | -2.97832 |
| C  | 0.73214  | -1.49792 | -1.90350 |
| H  | -0.18870 | -1.73080 | -2.42783 |
| C  | 0.80773  | -0.56380 | -0.89183 |
| Br | -2.83151 | -0.55183 | -1.31914 |
| C  | 1.96935  | 0.88840  | 0.48746  |
| C  | -0.61378 | 1.79846  | 1.72155  |
| H  | -0.16926 | 1.09308  | 2.43388  |
| C  | 0.08815  | 2.54734  | -1.17354 |
| H  | 0.62463  | 3.37955  | -0.69617 |
| P  | 0.21292  | 1.22491  | 0.12852  |
| Cu | -0.98124 | -0.77991 | 0.08236  |
| Br | -0.58148 | -1.86189 | 2.10668  |
| C  | -1.35837 | 2.97079  | -1.44597 |
| H  | -1.82325 | 3.43704  | -0.57438 |
| H  | -1.35496 | 3.71085  | -2.25340 |
| H  | -1.97315 | 2.12030  | -1.75407 |
| C  | 0.81749  | 2.16916  | -2.46176 |
| H  | 0.82513  | 3.04330  | -3.12153 |
| H  | 1.85609  | 1.87429  | -2.29052 |
| H  | 0.30283  | 1.35771  | -2.98432 |
| C  | -2.13243 | 1.69058  | 1.82059  |
| H  | -2.42435 | 2.01069  | 2.82721  |
| H  | -2.64878 | 2.32970  | 1.10147  |
| H  | -2.48236 | 0.66462  | 1.68642  |
| C  | -0.11301 | 3.21831  | 2.01763  |
| H  | 0.97427  | 3.31557  | 1.95281  |
| H  | -0.57284 | 3.95934  | 1.35807  |
| H  | -0.39936 | 3.46261  | 3.04708  |

### ▪ X : Br, CH<sub>3</sub>CN

#### CuBr profile compound 1 in CH<sub>3</sub>CN

Sum of electronic and zero-point Energies = -3534.245497  
 Sum of electronic and thermal Enthalpies = -3534.225714  
 Sum of electronic and thermal Free Energies = -3534.291966

|   |          |          |          |
|---|----------|----------|----------|
| P | -1.43056 | -0.08209 | -0.42163 |
| C | -1.95180 | -0.86481 | 1.22858  |
| H | -0.98583 | -1.17005 | 1.64955  |
| C | 1.91605  | -0.75442 | -0.22703 |
| C | 1.40368  | 0.55453  | 0.04202  |
| C | 3.25851  | -1.01651 | -0.40256 |
| C | 0.01753  | 0.96066  | 0.15228  |
| C | 2.42355  | 1.56352  | 0.23073  |
| C | 4.21411  | 0.00813  | -0.28892 |
| H | 3.58124  | -2.03181 | -0.60680 |
| C | -0.24589 | 2.25730  | 0.56909  |
| C | 2.06840  | 2.87963  | 0.62345  |
| C | 3.79847  | 1.27047  | 0.04672  |
| H | 5.26563  | -0.21904 | -0.43619 |
| C | 0.75730  | 3.21390  | 0.82396  |
| H | -1.27441 | 2.57812  | 0.68459  |
| H | 2.86397  | 3.60591  | 0.76789  |
| H | 4.51590  | 2.07489  | 0.18488  |
| H | 0.47786  | 4.21252  | 1.14787  |

|    |          |          |          |
|----|----------|----------|----------|
| C  | -2.76017 | 1.19814  | -0.79666 |
| H  | -2.93989 | 1.85877  | 0.05964  |
| C  | -2.76245 | -2.14369 | 1.00180  |
| H  | -2.22990 | -2.84324 | 0.34892  |
| H  | -2.94209 | -2.65151 | 1.95768  |
| H  | -3.73860 | -1.94384 | 0.54897  |
| C  | -2.62606 | 0.07663  | 2.22309  |
| H  | -3.61618 | 0.39568  | 1.88057  |
| H  | -2.76361 | -0.43242 | 3.18567  |
| H  | -2.02580 | 0.97276  | 2.40928  |
| C  | -4.07349 | 0.46845  | -1.10420 |
| H  | -3.94892 | -0.27258 | -1.90318 |
| H  | -4.48181 | -0.04342 | -0.22885 |
| H  | -4.82650 | 1.19140  | -1.44127 |
| C  | -2.34068 | 2.03872  | -2.00703 |
| H  | -2.18251 | 1.40494  | -2.88811 |
| H  | -3.12949 | 2.75913  | -2.25596 |
| H  | -1.41941 | 2.60206  | -1.83215 |
| Br | 0.81933  | -2.31659 | -0.27430 |

#### CuBr profile compound 2 in CH<sub>3</sub>CN

Sum of electronic and zero-point Energies = -6303.476945  
 Sum of electronic and thermal Enthalpies = -6303.452548  
 Sum of electronic and thermal Free Energies = -6303.534752

|    |          |          |          |
|----|----------|----------|----------|
| C  | 3.18126  | -3.00061 | 1.18666  |
| C  | 2.40723  | -3.49781 | 0.14569  |
| C  | 1.77383  | -2.60872 | -0.76639 |
| C  | 2.02018  | -1.25810 | -0.49872 |
| C  | 3.40389  | -1.61090 | 1.42802  |
| C  | 0.93844  | -2.82488 | -1.89722 |
| C  | 0.44691  | -1.74629 | -2.62256 |
| H  | 0.67907  | -3.83518 | -2.20203 |
| H  | 3.64850  | -3.70997 | 1.86427  |
| H  | 2.28875  | -4.57231 | 0.03494  |
| H  | 4.01978  | -1.29475 | 2.26352  |
| H  | -0.18651 | -1.95019 | -3.48151 |
| C  | 0.71995  | -0.37910 | -2.31243 |
| H  | 0.29848  | 0.41289  | -2.92255 |
| C  | 1.52505  | -0.15679 | -1.22309 |
| Br | -4.51475 | 0.45272  | -1.14212 |
| C  | 2.80160  | -0.74217 | 0.55269  |
| C  | 1.32513  | 1.88835  | 1.10231  |
| H  | 0.54616  | 1.15937  | 1.37064  |
| C  | 3.77598  | 1.94537  | -0.74147 |
| H  | 3.94481  | 2.72770  | 0.00870  |
| P  | 2.39582  | 0.94201  | -0.04488 |
| Cu | -3.01016 | -0.01529 | 0.39595  |
| Br | -1.51558 | -0.49252 | 1.95367  |
| C  | 3.34033  | 2.59050  | -2.06320 |
| H  | 2.42728  | 3.18349  | -1.96443 |
| H  | 4.13835  | 3.25816  | -2.40324 |
| H  | 3.17946  | 1.83248  | -2.83577 |
| C  | 5.04695  | 1.10864  | -0.89792 |
| H  | 4.89961  | 0.27794  | -1.59534 |
| H  | 5.83762  | 1.74896  | -1.30236 |
| H  | 5.39313  | 0.70567  | 0.05749  |
| C  | 0.66993  | 3.09192  | 0.42088  |
| H  | -0.04114 | 3.53980  | 1.12295  |
| H  | 1.40533  | 3.85679  | 0.15397  |
| H  | 0.11472  | 2.80639  | -0.47763 |
| C  | 2.11301  | 2.27176  | 2.35924  |
| H  | 2.54747  | 1.39878  | 2.85573  |
| H  | 2.91402  | 2.98424  | 2.13842  |
| H  | 1.42570  | 2.74892  | 3.06549  |

#### CuBr profile compound I in CH<sub>3</sub>CN

Sum of electronic and zero-point Energies = -6303.473667  
 Sum of electronic and thermal Enthalpies = -6303.449488  
 Sum of electronic and thermal Free Energies = -6303.528640

|   |         |          |          |
|---|---------|----------|----------|
| C | 3.76298 | 1.70363  | -1.05926 |
| C | 4.21078 | 0.41639  | -1.18127 |
| C | 3.42021 | -0.67074 | -0.72749 |
| C | 2.13319 | -0.42874 | -0.11879 |
| C | 2.46016 | 1.93708  | -0.57518 |

|    |          |          |          |
|----|----------|----------|----------|
| C  | 3.93419  | -1.98514 | -0.86176 |
| C  | 3.24291  | -3.06748 | -0.38074 |
| H  | 4.89673  | -2.11125 | -1.34958 |
| H  | 4.37603  | 2.54228  | -1.37526 |
| H  | 5.18300  | 0.19921  | -1.61546 |
| H  | 2.10512  | 2.96108  | -0.58269 |
| H  | 3.62879  | -4.07621 | -0.49045 |
| C  | 2.04347  | -2.85571 | 0.32236  |
| H  | 1.53647  | -3.69480 | 0.78656  |
| C  | 1.53131  | -1.58474 | 0.46582  |
| Br | 0.04309  | -1.47251 | 1.65707  |
| C  | 1.61853  | 0.92094  | -0.14987 |
| C  | -0.22264 | 2.01900  | 1.87763  |
| H  | 0.38222  | 1.27156  | 2.40444  |
| C  | -0.45346 | 2.83072  | -1.04422 |
| H  | 0.25848  | 3.63031  | -0.81438 |
| P  | -0.16349 | 1.38724  | 0.10775  |
| Cu | -1.60190 | -0.21807 | -0.37901 |
| Br | -3.12562 | -1.72073 | -1.01301 |
| C  | -1.86887 | 3.37871  | -0.83234 |
| H  | -2.62476 | 2.59201  | -0.94428 |
| H  | -1.99699 | 3.83956  | 0.15036  |
| H  | -2.07396 | 4.14738  | -1.58627 |
| C  | -0.26939 | 2.38406  | -2.49716 |
| H  | 0.73480  | 2.00129  | -2.69926 |
| H  | -0.98990 | 1.59942  | -2.75766 |
| H  | -0.44606 | 3.23412  | -3.16589 |
| C  | -1.63682 | 1.96276  | 2.46063  |
| H  | -2.08443 | 0.96922  | 2.34826  |
| H  | -1.59949 | 2.19247  | 3.53182  |
| H  | -2.30864 | 2.68633  | 1.98990  |
| C  | 0.43110  | 3.38613  | 2.06824  |
| H  | 0.45427  | 3.63059  | 3.13660  |
| H  | 1.46303  | 3.40174  | 1.70538  |
| H  | -0.12478 | 4.18111  | 1.56096  |

#### CuBr profile TS1 in CH<sub>3</sub>CN

Sum of electronic and zero-point Energies= -6303.442958  
 Sum of electronic and thermal Enthalpies = -6303.419291  
 Sum of electronic and thermal Free Energies = -6303.496207

|    |          |          |          |
|----|----------|----------|----------|
| C  | 1.03517  | -2.68855 | -0.50713 |
| C  | 0.88493  | -1.37015 | -0.13195 |
| C  | 1.97703  | -0.45458 | -0.14131 |
| C  | 3.27332  | -0.96865 | -0.45899 |
| C  | 3.40697  | -2.32760 | -0.85405 |
| C  | 2.30516  | -3.14530 | -0.93856 |
| H  | 0.20883  | -3.38839 | -0.44512 |
| C  | 1.79266  | 0.94013  | 0.03397  |
| C  | 4.36915  | -0.07025 | -0.44993 |
| H  | 4.39442  | -2.70435 | -1.10623 |
| H  | 2.40441  | -4.17580 | -1.26715 |
| C  | 4.18365  | 1.27058  | -0.19097 |
| C  | 2.88593  | 1.78832  | 0.00830  |
| H  | 5.35852  | -0.45326 | -0.68668 |
| H  | 5.03264  | 1.94792  | -0.19322 |
| H  | 2.75432  | 2.86160  | 0.10750  |
| Br | -0.47128 | -1.64643 | 1.89424  |
| C  | -0.33623 | 2.10156  | 1.75428  |
| H  | 0.15540  | 1.35699  | 2.39305  |
| C  | -0.08163 | 2.80487  | -1.21660 |
| H  | 0.65632  | 3.56134  | -0.91928 |
| Cu | -0.92612 | -0.64849 | -0.28977 |
| Br | -3.03787 | -0.96463 | -1.13384 |
| P  | 0.03369  | 1.44039  | 0.04449  |
| C  | -1.47146 | 3.44438  | -1.24234 |
| H  | -1.50462 | 4.19553  | -2.03959 |
| H  | -2.25222 | 2.70505  | -1.45039 |
| H  | -1.71603 | 3.94857  | -0.30426 |
| C  | 0.29633  | 2.25018  | -2.59300 |
| H  | 1.30657  | 1.83092  | -2.60983 |
| H  | -0.40445 | 1.46973  | -2.91093 |
| H  | 0.25839  | 3.05668  | -3.33384 |
| C  | -1.83472 | 2.07183  | 2.06995  |
| H  | -2.25782 | 1.07181  | 1.93832  |
| H  | -1.98584 | 2.36300  | 3.11577  |

|   |          |         |         |
|---|----------|---------|---------|
| H | -2.40305 | 2.76766 | 1.44651 |
| C | 0.28761  | 3.47088 | 2.03036 |
| H | 0.10069  | 3.74516 | 3.07525 |
| H | 1.37045  | 3.46818 | 1.87873 |
| H | -0.14798 | 4.25331 | 1.40123 |

#### CuBr profile compound II in CH<sub>3</sub>CN

Sum of electronic and zero-point Energies= -6303.463738  
 Sum of electronic and thermal Enthalpies = -6303.440121  
 Sum of electronic and thermal Free Energies = -6303.515894

|    |          |          |          |
|----|----------|----------|----------|
| C  | -4.29867 | -1.20858 | -0.80316 |
| C  | -4.56262 | 0.11125  | -0.51482 |
| C  | -3.52417 | 1.00089  | -0.13356 |
| C  | -2.18300 | 0.50248  | -0.09488 |
| C  | -2.98558 | -1.72043 | -0.68954 |
| C  | -3.75610 | 2.35773  | 0.19927  |
| C  | -2.70140 | 3.16475  | 0.55371  |
| H  | -4.77211 | 2.74314  | 0.17625  |
| H  | -5.10353 | -1.87386 | -1.10179 |
| H  | -5.57786 | 0.49471  | -0.58044 |
| H  | -2.81191 | -2.77551 | -0.87643 |
| H  | -2.87509 | 4.20301  | 0.82514  |
| C  | -1.36861 | 2.68045  | 0.54729  |
| H  | -0.56341 | 3.36761  | 0.77804  |
| C  | -1.09482 | 1.37503  | 0.19604  |
| Br | 2.80047  | -0.47797 | -0.14742 |
| C  | -1.95603 | -0.87489 | -0.32829 |
| C  | -0.30922 | -1.92052 | 1.83523  |
| H  | -0.88174 | -1.10790 | 2.30220  |
| C  | 0.20538  | -2.65408 | -1.15379 |
| H  | -0.72655 | -3.23633 | -1.17449 |
| P  | -0.23998 | -1.32562 | 0.06849  |
| Cu | 0.75430  | 0.69005  | 0.00614  |
| Br | 1.76022  | 2.77177  | -0.13693 |
| C  | 1.33931  | -3.59973 | -0.76451 |
| H  | 1.15703  | -4.10116 | 0.18896  |
| H  | 1.42096  | -4.37270 | -1.53723 |
| H  | 2.28865  | -3.06631 | -0.70274 |
| C  | 0.41957  | -2.02814 | -2.53448 |
| H  | 1.35045  | -1.45326 | -2.55213 |
| H  | 0.49093  | -2.82422 | -3.28317 |
| H  | -0.40477 | -1.36877 | -2.82495 |
| C  | 1.04656  | -2.01433 | 2.53450  |
| H  | 0.87024  | -2.25584 | 3.58865  |
| H  | 1.67284  | -2.80221 | 2.10848  |
| H  | 1.60222  | -1.07559 | 2.48637  |
| C  | -1.11651 | -3.21634 | 1.96288  |
| H  | -0.60517 | -4.06424 | 1.49875  |
| H  | -1.23905 | -3.44351 | 3.02770  |
| H  | -2.11577 | -3.13052 | 1.52816  |

#### CuBr profile TS2 in CH<sub>3</sub>CN

Sum of electronic and zero-point Energies= -6303.435143  
 Sum of electronic and thermal Enthalpies = -6303.411346  
 Sum of electronic and thermal Free Energies = -6303.489303

|    |          |          |          |
|----|----------|----------|----------|
| C  | 4.32889  | 0.62566  | 0.87588  |
| C  | 4.40710  | -0.45619 | 0.01209  |
| C  | 3.24893  | -0.92764 | -0.66199 |
| C  | 2.05681  | -0.25998 | -0.32634 |
| C  | 3.12115  | 1.33422  | 1.12602  |
| C  | 3.12431  | -1.94270 | -1.64860 |
| C  | 1.90386  | -2.16887 | -2.26030 |
| H  | 3.99510  | -2.51931 | -1.94834 |
| H  | 5.23467  | 0.96801  | 1.36846  |
| H  | 5.36585  | -0.93738 | -0.16244 |
| H  | 3.12720  | 2.20997  | 1.76649  |
| H  | 1.83528  | -2.92402 | -3.03890 |
| C  | 0.71449  | -1.45268 | -1.93200 |
| H  | -0.20773 | -1.65776 | -2.46552 |
| C  | 0.80166  | -0.54367 | -0.89783 |
| Br | -2.84707 | -0.51099 | -1.31762 |
| C  | 1.98499  | 0.86276  | 0.50977  |
| C  | -0.59317 | 1.78675  | 1.74596  |
| H  | -0.16572 | 1.06137  | 2.44854  |
| C  | 0.13119  | 2.57553  | -1.13754 |



|    |          |          |          |
|----|----------|----------|----------|
| H  | 0.66790  | 3.39986  | -0.64789 |
| P  | 0.23844  | 1.23795  | 0.14846  |
| Cu | -0.98368 | -0.76253 | 0.06912  |
| Br | -0.61795 | -1.91252 | 2.06696  |
| C  | -1.31206 | 3.00798  | -1.41344 |
| H  | -1.77462 | 3.47577  | -0.54152 |
| H  | -1.29972 | 3.74989  | -2.21910 |
| H  | -1.93216 | 2.16279  | -1.72624 |
| C  | 0.86753  | 2.20744  | -2.42451 |
| H  | 0.88432  | 3.08985  | -3.07287 |
| H  | 1.90349  | 1.90586  | -2.24856 |
| H  | 0.35265  | 1.40465  | -2.96029 |
| C  | -2.11429 | 1.70392  | 1.82858  |
| H  | -2.40861 | 2.00060  | 2.84163  |
| H  | -2.60964 | 2.37504  | 1.12402  |
| H  | -2.48360 | 0.68984  | 1.65926  |
| C  | -0.07121 | 3.19230  | 2.07379  |
| H  | 1.01821  | 3.27075  | 2.02333  |
| H  | -0.51080 | 3.95113  | 1.42065  |
| H  | -0.36750 | 3.42109  | 3.10399  |

### ▪ X : Cl, gas phase

#### CuCl profile compound 1 in GAS phase

Sum of electronic and zero-point Energies= -1422.676616  
Sum of electronic and thermal Enthalpies = -1422.657027  
Sum of electronic and thermal Free Energies = -1422.722702

|    |          |          |          |
|----|----------|----------|----------|
| P  | 1.36975  | 0.26705  | -0.45410 |
| C  | 1.86904  | 1.04943  | 1.20385  |
| H  | 0.90633  | 1.42549  | 1.57199  |
| C  | -1.90653 | 1.17745  | -0.34861 |
| C  | -1.50491 | -0.15563 | -0.01170 |
| C  | -3.22682 | 1.54686  | -0.49759 |
| C  | -0.15521 | -0.66783 | 0.10243  |
| C  | -2.60201 | -1.06174 | 0.24386  |
| C  | -4.26372 | 0.62192  | -0.29578 |
| H  | -3.45432 | 2.57499  | -0.75699 |
| C  | 0.00450  | -1.97283 | 0.54302  |
| C  | -2.35035 | -2.39087 | 0.66625  |
| C  | -3.95004 | -0.65537 | 0.08638  |
| H  | -5.29607 | 0.93338  | -0.42155 |
| C  | -1.06920 | -2.83519 | 0.83664  |
| H  | 1.00506  | -2.37323 | 0.65599  |
| H  | -3.19989 | -3.04176 | 0.85516  |
| H  | -4.73164 | -1.38476 | 0.28057  |
| H  | -0.86971 | -3.84731 | 1.17695  |
| C  | 2.63385  | -1.10066 | -0.74738 |
| H  | 2.75330  | -1.75449 | 0.12648  |
| C  | 2.77424  | 2.26706  | 0.99089  |
| H  | 2.33830  | 2.96614  | 0.27132  |
| H  | 2.91941  | 2.80175  | 1.93737  |
| H  | 3.76534  | 1.98689  | 0.62093  |
| C  | 2.42712  | 0.09198  | 2.25490  |
| H  | 3.40278  | -0.31223 | 1.96447  |
| H  | 2.56676  | 0.61642  | 3.20823  |
| H  | 1.75062  | -0.74818 | 2.43838  |
| C  | 3.99548  | -0.45213 | -1.02867 |
| H  | 3.92884  | 0.27439  | -1.84623 |
| H  | 4.40250  | 0.06179  | -0.15400 |
| H  | 4.72061  | -1.21954 | -1.32452 |
| C  | 2.20495  | -1.94099 | -1.95572 |
| H  | 2.09522  | -1.30968 | -2.84450 |
| H  | 2.96397  | -2.70051 | -2.17812 |
| H  | 1.25332  | -2.45428 | -1.79456 |
| Cl | -0.76761 | 2.49236  | -0.54309 |

#### CuCl profile compound 2 in GAS phase

Sum of electronic and zero-point Energies= -2080.292192  
Sum of electronic and thermal Enthalpies = -2080.267931  
Sum of electronic and thermal Free Energies = -2080.347386

|   |         |          |          |
|---|---------|----------|----------|
| C | 4.25515 | -0.93147 | 1.13619  |
| C | 3.86853 | -2.00684 | 0.34774  |
| C | 2.64509 | -1.96803 | -0.37491 |

|    |          |          |          |
|----|----------|----------|----------|
| C  | 1.92770  | -0.77988 | -0.20092 |
| C  | 3.48999  | 0.26338  | 1.28685  |
| C  | 2.00358  | -2.90107 | -1.23385 |
| C  | 0.77855  | -2.59597 | -1.81220 |
| H  | 2.46435  | -3.86342 | -1.43936 |
| H  | 5.19491  | -1.00092 | 1.67659  |
| H  | 4.50944  | -2.88263 | 0.29311  |
| H  | 3.85349  | 1.06275  | 1.92453  |
| H  | 0.31534  | -3.33766 | -2.45649 |
| C  | 0.07089  | -1.37371 | -1.60596 |
| H  | -0.90009 | -1.19484 | -2.05964 |
| C  | 0.68228  | -0.46695 | -0.77721 |
| Cl | -3.14767 | 0.11391  | -1.68672 |
| C  | 2.30550  | 0.31860  | 0.59406  |
| C  | -0.39282 | 1.50743  | 1.49125  |
| H  | -0.73610 | 0.51248  | 1.82124  |
| C  | 0.93176  | 2.59554  | -1.03129 |
| H  | 0.69691  | 3.46380  | -0.40167 |
| P  | 0.74207  | 1.14155  | 0.09318  |
| Cu | -2.80720 | -0.83510 | 0.21123  |
| Cl | -2.14668 | -1.54980 | 2.11197  |
| C  | -0.09563 | 2.49541  | -2.16975 |
| H  | -1.11427 | 2.29364  | -1.82820 |
| H  | -0.10048 | 3.43682  | -2.72787 |
| H  | 0.17909  | 1.69318  | -2.86032 |
| C  | 2.36291  | 2.72449  | -1.55957 |
| H  | 2.65310  | 1.84438  | -2.14167 |
| H  | 2.42107  | 3.59365  | -2.22218 |
| H  | 3.09353  | 2.85936  | -0.75785 |
| C  | -1.61550 | 2.33138  | 1.07757  |
| H  | -2.27297 | 2.41215  | 1.94833  |
| H  | -1.34597 | 3.34765  | 0.76922  |
| H  | -2.19215 | 1.84974  | 0.28249  |
| C  | 0.41163  | 2.18013  | 2.61313  |
| H  | 1.23277  | 1.55243  | 2.96889  |
| H  | 0.81407  | 3.15520  | 2.31351  |
| H  | -0.26193 | 2.35235  | 3.45791  |

#### CuCl profile compound I in GAS phase

Sum of electronic and zero-point Energies= -2080.314469  
Sum of electronic and thermal Enthalpies = -2080.290972  
Sum of electronic and thermal Free Energies = -2080.367129

|    |          |          |          |
|----|----------|----------|----------|
| C  | -2.61621 | -2.68241 | -0.91232 |
| C  | -3.58499 | -1.71807 | -0.93614 |
| C  | -3.31670 | -0.40808 | -0.46550 |
| C  | -2.01252 | -0.07589 | 0.05606  |
| C  | -1.31478 | -2.33721 | -0.49960 |
| C  | -4.35830 | 0.55108  | -0.50363 |
| C  | -4.17081 | 1.81687  | -0.01342 |
| H  | -5.31404 | 0.25547  | -0.92696 |
| H  | -2.82469 | -3.69401 | -1.24678 |
| H  | -4.58264 | -1.93794 | -1.30627 |
| H  | -0.55067 | -3.10185 | -0.57478 |
| H  | -4.96387 | 2.55671  | -0.05259 |
| C  | -2.94688 | 2.14065  | 0.59490  |
| H  | -2.80447 | 3.11174  | 1.05603  |
| C  | -1.92158 | 1.22139  | 0.65034  |
| Cl | -0.54564 | 1.71689  | 1.61079  |
| C  | -0.96922 | -1.06968 | -0.05900 |
| C  | 1.17067  | -1.23154 | 1.94164  |
| H  | 0.30405  | -0.79567 | 2.45187  |
| C  | 1.70630  | -2.00710 | -0.93565 |
| H  | 1.39934  | -3.01744 | -0.63920 |
| P  | 0.85055  | -0.74167 | 0.15040  |
| Cu | 1.56133  | 1.22806  | -0.48823 |
| Cl | 2.43304  | 2.99473  | -1.25520 |
| C  | 3.22409  | -1.89784 | -0.73967 |
| H  | 3.58027  | -0.88350 | -0.95130 |
| H  | 3.54026  | -2.16692 | 0.27104  |
| H  | 3.72821  | -2.57884 | -1.43416 |
| C  | 1.35011  | -1.77124 | -2.40763 |
| H  | 0.27864  | -1.85883 | -2.60327 |
| H  | 1.67062  | -0.77390 | -2.72843 |
| H  | 1.86961  | -2.50540 | -3.03329 |
| C  | 2.42449  | -0.56179 | 2.51126  |

|   |         |          |         |
|---|---------|----------|---------|
| H | 2.40413 | 0.52214  | 2.36498 |
| H | 2.48947 | -0.75702 | 3.58759 |
| H | 3.34255 | -0.93986 | 2.05319 |
| C | 1.14911 | -2.74111 | 2.18248 |
| H | 1.20646 | -2.94192 | 3.25800 |
| H | 0.22770 | -3.20167 | 1.81356 |
| H | 1.99994 | -3.24564 | 1.71353 |

**CuCl profile TS1 in GAS phase**

Sum of electronic and zero-point Energies= -2080.275974

Sum of electronic and thermal Enthalpies = -2080.252679

Sum of electronic and thermal Free Energies = -2080.327606

|    |          |          |          |
|----|----------|----------|----------|
| C  | 2.27726  | -2.03172 | -0.08633 |
| C  | 1.37018  | -1.02457 | 0.17066  |
| C  | 1.74806  | 0.35229  | 0.10723  |
| C  | 3.12654  | 0.65957  | -0.11152 |
| C  | 4.04192  | -0.39515 | -0.37191 |
| C  | 3.61122  | -1.69910 | -0.42193 |
| H  | 1.98931  | -3.07110 | 0.02750  |
| C  | 0.78881  | 1.39675  | 0.12960  |
| C  | 3.50875  | 2.02308  | -0.14639 |
| H  | 5.08568  | -0.15230 | -0.55073 |
| H  | 4.30801  | -2.50061 | -0.64827 |
| C  | 2.57399  | 3.02779  | -0.02976 |
| C  | 1.20171  | 2.71531  | 0.06351  |
| H  | 4.55670  | 2.26631  | -0.30181 |
| H  | 2.88547  | 4.06756  | -0.06462 |
| H  | 0.47430  | 3.52161  | 0.04463  |
| Cl | 0.27348  | -1.84330 | 1.97987  |
| C  | -1.75378 | 1.17827  | 1.64858  |
| H  | -0.97986 | 0.85900  | 2.35816  |
| C  | -1.71567 | 1.75997  | -1.36015 |
| H  | -1.62588 | 2.82437  | -1.10117 |
| Cu | -0.49041 | -1.46864 | -0.21950 |
| Cl | -1.97023 | -2.71602 | -1.19499 |
| P  | -0.92997 | 0.78240  | 0.01665  |
| C  | -3.19652 | 1.39590  | -1.51152 |
| H  | -3.60742 | 1.90264  | -2.39145 |
| H  | -3.32411 | 0.31768  | -1.65395 |
| H  | -3.79219 | 1.70258  | -0.64811 |
| C  | -0.95195 | 1.49247  | -2.66177 |
| H  | 0.10571  | 1.75923  | -2.58555 |
| H  | -1.02256 | 0.43646  | -2.94261 |
| H  | -1.39055 | 2.08510  | -3.47190 |
| C  | -2.98992 | 0.30527  | 1.89287  |
| H  | -2.76599 | -0.75608 | 1.75992  |
| H  | -3.33570 | 0.45139  | 2.92200  |
| H  | -3.81837 | 0.56287  | 1.22749  |
| C  | -2.03655 | 2.66722  | 1.85750  |
| H  | -2.43784 | 2.82496  | 2.86481  |
| H  | -1.13222 | 3.27583  | 1.76775  |
| H  | -2.78073 | 3.04530  | 1.14897  |

**CuCl profile compound II in GAS phase**

Sum of electronic and zero-point Energies= -2080.297432

Sum of electronic and thermal Enthalpies = -2080.274259

Sum of electronic and thermal Free Energies = -2080.348369

|    |          |          |          |
|----|----------|----------|----------|
| C  | -2.85954 | -2.85341 | -0.56412 |
| C  | -3.74254 | -1.81934 | -0.35172 |
| C  | -3.28764 | -0.50345 | -0.08312 |
| C  | -1.87685 | -0.26336 | -0.06468 |
| C  | -1.46723 | -2.62882 | -0.48979 |
| C  | -4.16376 | 0.58245  | 0.15222  |
| C  | -3.65286 | 1.83392  | 0.39598  |
| H  | -5.23697 | 0.41113  | 0.14021  |
| H  | -3.22881 | -3.85189 | -0.77801 |
| H  | -4.81377 | -1.99986 | -0.39590 |
| H  | -0.78872 | -3.46513 | -0.63183 |
| H  | -4.32269 | 2.66796  | 0.58717  |
| C  | -2.25690 | 2.07801  | 0.38288  |
| H  | -1.89172 | 3.08485  | 0.54525  |
| C  | -1.36999 | 1.05491  | 0.12992  |
| Cl | 2.77895  | 1.33551  | -0.33182 |
| C  | -0.99388 | -1.35751 | -0.23291 |

|    |         |          |          |
|----|---------|----------|----------|
| C  | 1.06903 | -1.33578 | 1.82357  |
| H  | 0.18592 | -0.91709 | 2.32584  |
| C  | 1.72187 | -1.81209 | -1.18069 |
| H  | 1.22959 | -2.79476 | -1.13387 |
| P  | 0.72362 | -0.83997 | 0.05366  |
| Cu | 0.56399 | 1.37720  | -0.07363 |
| Cl | 0.42128 | 3.55609  | -0.11528 |
| C  | 3.20611 | -2.00728 | -0.87226 |
| H  | 3.37592 | -2.47017 | 0.10277  |
| H  | 3.63254 | -2.67283 | -1.63105 |
| H  | 3.74051 | -1.05740 | -0.90278 |
| C  | 1.49876 | -1.22592 | -2.57961 |
| H  | 1.97108 | -0.24321 | -2.66060 |
| H  | 1.95183 | -1.88761 | -3.32524 |
| H  | 0.43637 | -1.12692 | -2.82236 |
| C  | 2.31570 | -0.69175 | 2.43447  |
| H  | 2.35210 | -0.94667 | 3.49925  |
| H  | 3.23612 | -1.05303 | 1.96994  |
| H  | 2.30718 | 0.39540  | 2.33898  |
| C  | 1.04623 | -2.85679 | 2.01050  |
| H  | 1.89142 | -3.34434 | 1.51589  |
| H  | 1.12015 | -3.08279 | 3.07950  |
| H  | 0.11923 | -3.30506 | 1.64411  |

**CuCl profile TS2 in GAS phase**

Sum of electronic and zero-point Energies= -2080.265499

Sum of electronic and thermal Enthalpies = -2080.242187

Sum of electronic and thermal Free Energies = -2080.317182

|    |          |          |          |
|----|----------|----------|----------|
| C  | 3.53527  | 1.94401  | 0.80629  |
| C  | 4.04761  | 0.70146  | 0.47031  |
| C  | 3.18952  | -0.33954 | 0.02800  |
| C  | 1.82111  | -0.01362 | 0.02274  |
| C  | 2.15256  | 2.26206  | 0.71503  |
| C  | 3.50776  | -1.64496 | -0.43179 |
| C  | 2.50845  | -2.48046 | -0.89736 |
| H  | 4.54046  | -1.98244 | -0.43942 |
| H  | 4.21977  | 2.71919  | 1.13861  |
| H  | 5.11806  | 0.52698  | 0.53946  |
| H  | 1.81602  | 3.26653  | 0.95064  |
| H  | 2.77659  | -3.46625 | -1.26740 |
| C  | 1.12929  | -2.11872 | -0.92332 |
| H  | 0.38162  | -2.80232 | -1.31315 |
| C  | 0.80164  | -0.88949 | -0.39415 |
| Cl | -2.45806 | -1.99397 | -0.95108 |
| C  | 1.30274  | 1.25520  | 0.31925  |
| C  | -1.60302 | 1.75603  | 0.95169  |
| H  | -1.13589 | 1.53099  | 1.91849  |
| C  | -0.64604 | 1.49571  | -1.93372 |
| H  | -0.45762 | 2.57181  | -1.80623 |
| P  | -0.40805 | 0.86131  | -0.19568 |
| Cu | -1.00469 | -1.22431 | 0.53216  |
| Cl | -0.76359 | -1.07633 | 2.71633  |
| C  | -2.07320 | 1.29214  | -2.45434 |
| H  | -2.81122 | 1.85167  | -1.87596 |
| H  | -2.12209 | 1.65445  | -3.48669 |
| H  | -2.35578 | 0.23611  | -2.43752 |
| C  | 0.38981  | 0.93580  | -2.90860 |
| H  | 0.27786  | 1.44904  | -3.86935 |
| H  | 1.41653  | 1.08702  | -2.56611 |
| H  | 0.23145  | -0.13252 | -3.07627 |
| C  | -3.04013 | 1.24039  | 0.99650  |
| H  | -3.57978 | 1.81391  | 1.75807  |
| H  | -3.56600 | 1.36137  | 0.04739  |
| H  | -3.08274 | 0.18789  | 1.28226  |
| C  | -1.53163 | 3.26158  | 0.66198  |
| H  | -0.50892 | 3.64804  | 0.61777  |
| H  | -2.04294 | 3.52496  | -0.26870 |
| H  | -2.04116 | 3.78821  | 1.47625  |

▪ **X : Cl, DCM**

**CuCl profile compound 1 in DCM**

Sum of electronic and zero-point Energies= -1422.697293  
 Sum of electronic and thermal Enthalpies = -1422.677777  
 Sum of electronic and thermal Free Energies = -1422.743021

|    |          |          |          |
|----|----------|----------|----------|
| P  | 1.36771  | 0.26188  | -0.44600 |
| C  | 1.93129  | 1.04478  | 1.18906  |
| H  | 0.98713  | 1.43120  | 1.59290  |
| C  | -1.91722 | 1.18575  | -0.33746 |
| C  | -1.51043 | -0.14386 | 0.00675  |
| C  | -3.23541 | 1.54625  | -0.52211 |
| C  | -0.16000 | -0.65020 | 0.13968  |
| C  | -2.60691 | -1.05528 | 0.24946  |
| C  | -4.26927 | 0.61056  | -0.34640 |
| H  | -3.47111 | 2.57223  | -0.78492 |
| C  | 0.00132  | -1.94599 | 0.60782  |
| C  | -2.35481 | -2.37609 | 0.70033  |
| C  | -3.95498 | -0.66148 | 0.05540  |
| H  | -5.30041 | 0.91321  | -0.50162 |
| C  | -1.07327 | -2.80735 | 0.90594  |
| H  | 1.00201  | -2.34197 | 0.73603  |
| H  | -3.20463 | -3.02837 | 0.88350  |
| H  | -4.73466 | -1.39605 | 0.23780  |
| H  | -0.87294 | -3.81111 | 1.27002  |
| C  | 2.59818  | -1.12143 | -0.78892 |
| H  | 2.72719  | -1.77835 | 0.07992  |
| C  | 2.84643  | 2.24881  | 0.94574  |
| H  | 2.40340  | 2.95851  | 0.23950  |
| H  | 3.02553  | 2.78219  | 1.88770  |
| H  | 3.82281  | 1.95291  | 0.54889  |
| C  | 2.51796  | 0.08103  | 2.21819  |
| H  | 3.48242  | -0.32533 | 1.89535  |
| H  | 2.68802  | 0.60463  | 3.16761  |
| H  | 1.84570  | -0.75775 | 2.42400  |
| C  | 3.96188  | -0.49595 | -1.10597 |
| H  | 3.89164  | 0.23535  | -1.92009 |
| H  | 4.40324  | 0.00495  | -0.24010 |
| H  | 4.66339  | -1.27685 | -1.42435 |
| C  | 2.11917  | -1.95159 | -1.98443 |
| H  | 2.00264  | -1.32328 | -2.87557 |
| H  | 2.85569  | -2.72913 | -2.22161 |
| H  | 1.16154  | -2.44696 | -1.79992 |
| Cl | -0.77987 | 2.51672  | -0.47667 |

**CuCl profile compound 2 in DCM**

Sum of electronic and zero-point Energies= -2080.350909  
 Sum of electronic and thermal Enthalpies = -2080.326516  
 Sum of electronic and thermal Free Energies = -2080.408437

|    |          |          |          |
|----|----------|----------|----------|
| C  | 2.82557  | 2.80333  | -2.03043 |
| C  | 1.78720  | 3.42172  | -1.34581 |
| C  | 1.06954  | 2.71712  | -0.33983 |
| C  | 1.52313  | 1.40943  | -0.13695 |
| C  | 3.25109  | 1.46032  | -1.79951 |
| C  | -0.02226 | 3.08017  | 0.49654  |
| C  | -0.54425 | 2.16809  | 1.40526  |
| H  | -0.45967 | 4.07247  | 0.42817  |
| H  | 3.34860  | 3.37206  | -2.79426 |
| H  | 1.52527  | 4.44790  | -1.58901 |
| H  | 4.06747  | 1.04109  | -2.37839 |
| H  | -1.38213 | 2.47852  | 2.02280  |
| C  | -0.05597 | 0.83746  | 1.57690  |
| H  | -0.52079 | 0.17677  | 2.30093  |
| C  | 1.00169  | 0.47597  | 0.78010  |
| Cl | -5.09923 | 0.87247  | 1.18842  |
| C  | 2.57204  | 0.77064  | -0.82612 |
| C  | 1.54677  | -2.12737 | -0.82229 |
| H  | 0.75422  | -1.64912 | -1.41109 |
| C  | 3.51741  | -1.28106 | 1.35922  |
| H  | 3.91391  | -2.20858 | 0.92764  |
| P  | 2.22651  | -0.73451 | 0.16108  |
| Cu | -4.06110 | -0.39143 | -0.21242 |
| Cl | -3.02082 | -1.66201 | -1.60834 |
| C  | 2.87276  | -1.58880 | 2.71707  |

|   |         |          |          |
|---|---------|----------|----------|
| H | 2.06367 | -2.32095 | 2.64625  |
| H | 3.63861 | -2.00235 | 3.38099  |
| H | 2.47865 | -0.67961 | 3.18074  |
| C | 4.64527 | -0.25297 | 1.47271  |
| H | 5.38826 | -0.62741 | 2.18418  |
| H | 5.14773 | -0.08653 | 0.51615  |
| H | 4.27935 | 0.70856  | 1.84616  |
| C | 0.92966 | -3.20891 | 0.06810  |
| H | 0.45527 | -3.95631 | -0.57558 |
| H | 1.68722 | -3.71995 | 0.67002  |
| H | 0.15890 | -2.80848 | 0.73232  |
| C | 2.61973 | -2.67733 | -1.76806 |
| H | 3.01367 | -1.90714 | -2.43752 |
| H | 3.45373 | -3.12907 | -1.22140 |
| H | 2.16679 | -3.45745 | -2.38797 |

**CuCl profile compound I in DCM**

Sum of electronic and zero-point Energies= -2080.354790  
 Sum of electronic and thermal Enthalpies = -2080.331382  
 Sum of electronic and thermal Free Energies = -2080.406554

|    |          |          |          |
|----|----------|----------|----------|
| C  | -2.66526 | -2.67030 | -0.85435 |
| C  | -3.62066 | -1.69236 | -0.89793 |
| C  | -3.33029 | -0.37706 | -0.45351 |
| C  | -2.01882 | -0.05352 | 0.05787  |
| C  | -1.35581 | -2.33571 | -0.45618 |
| C  | -4.36011 | 0.59552  | -0.50730 |
| C  | -4.15760 | 1.86671  | -0.03576 |
| H  | -5.31961 | 0.30256  | -0.92416 |
| H  | -2.88919 | -3.68690 | -1.16328 |
| H  | -4.62356 | -1.90363 | -1.25916 |
| H  | -0.60672 | -3.11663 | -0.51430 |
| H  | -4.94168 | 2.61606  | -0.08291 |
| C  | -2.92985 | 2.18302  | 0.57125  |
| H  | -2.78366 | 3.15708  | 1.02619  |
| C  | -1.91660 | 1.25112  | 0.63497  |
| Cl | -0.53340 | 1.73897  | 1.60090  |
| C  | -0.98897 | -1.06326 | -0.04524 |
| C  | 1.17929  | -1.24531 | 1.93592  |
| H  | 0.31877  | -0.81004 | 2.45696  |
| C  | 1.66111  | -2.04200 | -0.95337 |
| H  | 1.34349  | -3.04617 | -0.65157 |
| P  | 0.83904  | -0.76881 | 0.14624  |
| Cu | 1.58533  | 1.19699  | -0.50371 |
| Cl | 2.50078  | 3.02756  | -1.21046 |
| C  | 3.18113  | -1.95522 | -0.77719 |
| H  | 3.55285  | -0.94752 | -0.99785 |
| H  | 3.50323  | -2.22492 | 0.23153  |
| H  | 3.66478  | -2.64856 | -1.47477 |
| C  | 1.28469  | -1.80366 | -2.41844 |
| H  | 0.20921  | -1.88077 | -2.59908 |
| H  | 1.61162  | -0.81079 | -2.74994 |
| H  | 1.78498  | -2.54620 | -3.05055 |
| C  | 2.44044  | -0.57553 | 2.48690  |
| H  | 2.41759  | 0.50999  | 2.34542  |
| H  | 2.51814  | -0.77169 | 3.56267  |
| H  | 3.35245  | -0.95555 | 2.01678  |
| C  | 1.16387  | -2.75344 | 2.18170  |
| H  | 1.22679  | -2.94617 | 3.25899  |
| H  | 0.24200  | -3.21915 | 1.82036  |
| H  | 2.01352  | -3.25646 | 1.70919  |

**CuCl profile TS1 in DCM**

Sum of electronic and zero-point Energies= -2080.315834  
 Sum of electronic and thermal Enthalpies = -2080.292588  
 Sum of electronic and thermal Free Energies = -2080.366991

|   |         |          |          |
|---|---------|----------|----------|
| C | 2.35339 | -1.93988 | -0.01441 |
| C | 1.40962 | -0.95939 | 0.19917  |
| C | 1.71778 | 0.42965  | 0.11893  |
| C | 3.08621 | 0.78642  | -0.09844 |
| C | 4.04767 | -0.23533 | -0.32653 |
| C | 3.67563 | -1.55828 | -0.35090 |
| H | 2.11196 | -2.98857 | 0.12036  |
| C | 0.71617 | 1.43257  | 0.11643  |
| C | 3.41386 | 2.16322  | -0.16547 |
| H | 5.08178 | 0.04927  | -0.49999 |

|    |          |          |          |
|----|----------|----------|----------|
| H  | 4.40641  | -2.33610 | -0.55161 |
| C  | 2.43711  | 3.13044  | -0.06894 |
| C  | 1.07761  | 2.76547  | 0.02770  |
| H  | 4.45140  | 2.44295  | -0.32892 |
| H  | 2.70461  | 4.18154  | -0.12518 |
| H  | 0.31750  | 3.54029  | -0.00547 |
| Cl | 0.29052  | -1.80559 | 2.00962  |
| C  | -1.81529 | 1.14381  | 1.63834  |
| H  | -1.03182 | 0.85698  | 2.35083  |
| C  | -1.78551 | 1.74235  | -1.36634 |
| H  | -1.68132 | 2.80153  | -1.09481 |
| Cu | -0.43543 | -1.47597 | -0.24759 |
| Cl | -1.69448 | -3.05029 | -1.19507 |
| P  | -0.98416 | 0.76801  | 0.00403  |
| C  | -3.27149 | 1.40407  | -1.50613 |
| H  | -3.68415 | 1.94429  | -2.36564 |
| H  | -3.42498 | 0.33391  | -1.68274 |
| H  | -3.85062 | 1.69362  | -0.62591 |
| C  | -1.03776 | 1.48577  | -2.67763 |
| H  | 0.02160  | 1.75091  | -2.61467 |
| H  | -1.11091 | 0.43333  | -2.97401 |
| H  | -1.48517 | 2.08862  | -3.47576 |
| C  | -3.02878 | 0.24534  | 1.89248  |
| H  | -2.78281 | -0.81361 | 1.77281  |
| H  | -3.37547 | 0.39360  | 2.92150  |
| H  | -3.86454 | 0.47913  | 1.22672  |
| C  | -2.13911 | 2.62562  | 1.83465  |
| H  | -2.52740 | 2.77669  | 2.84864  |
| H  | -1.25603 | 3.26122  | 1.72444  |
| H  | -2.90555 | 2.97218  | 1.13441  |

#### CuCl profile compound II in DCM

Sum of electronic and zero-point Energies= -2080.339922  
 Sum of electronic and thermal Enthalpies = -2080.316663  
 Sum of electronic and thermal Free Energies = -2080.390286

|    |          |          |          |
|----|----------|----------|----------|
| C  | -2.94485 | -2.76972 | -0.63551 |
| C  | -3.79833 | -1.71406 | -0.40566 |
| C  | -3.30080 | -0.41914 | -0.10631 |
| C  | -1.88347 | -0.22773 | -0.08435 |
| C  | -1.54493 | -2.59467 | -0.55020 |
| C  | -4.13971 | 0.68889  | 0.16596  |
| C  | -3.58568 | 1.91215  | 0.45765  |
| H  | -5.21807 | 0.55451  | 0.14960  |
| H  | -3.34315 | -3.75270 | -0.86893 |
| H  | -4.87450 | -1.85990 | -0.45510 |
| H  | -0.89457 | -3.45160 | -0.69572 |
| H  | -4.22458 | 2.76187  | 0.68367  |
| C  | -2.18046 | 2.10702  | 0.45100  |
| H  | -1.79017 | 3.09580  | 0.65793  |
| C  | -1.33251 | 1.06454  | 0.14638  |
| Cl | 2.84023  | 1.32199  | -0.35772 |
| C  | -1.03396 | -1.34310 | -0.26998 |
| C  | 0.98144  | -1.35797 | 1.85071  |
| H  | 0.08723  | -0.93303 | 2.32582  |
| C  | 1.70985  | -1.88275 | -1.12954 |
| H  | 1.22248  | -2.86500 | -1.03809 |
| P  | 0.69112  | -0.88972 | 0.06657  |
| Cu | 0.60790  | 1.34985  | -0.08469 |
| Cl | 0.49922  | 3.58887  | -0.17949 |
| C  | 3.18944  | -2.06504 | -0.79757 |
| H  | 3.34917  | -2.45776 | 0.20915  |
| H  | 3.60970  | -2.78862 | -1.50530 |
| H  | 3.73850  | -1.12801 | -0.89649 |
| C  | 1.49515  | -1.36520 | -2.55417 |
| H  | 1.96379  | -0.38586 | -2.68743 |
| H  | 1.95817  | -2.06266 | -3.26032 |
| H  | 0.43524  | -1.28353 | -2.81365 |
| C  | 2.21209  | -0.70653 | 2.48216  |
| H  | 2.22810  | -0.96339 | 3.54713  |
| H  | 3.14500  | -1.06028 | 2.03649  |
| H  | 2.18835  | 0.38239  | 2.39702  |
| C  | 0.95657  | -2.87673 | 2.05023  |
| H  | 1.82164  | -3.36892 | 1.59747  |
| H  | 0.98595  | -3.08214 | 3.12607  |
| H  | 0.04600  | -3.33548 | 1.65577  |

#### CuCl profile TS2 in DCM

Sum of electronic and zero-point Energies= -2080.316578  
 Sum of electronic and thermal Enthalpies = -2080.293195  
 Sum of electronic and thermal Free Energies = -2080.368158

|    |          |          |          |
|----|----------|----------|----------|
| C  | 3.74241  | 1.10584  | 1.22842  |
| C  | 4.01181  | -0.16670 | 0.75161  |
| C  | 2.99286  | -0.93685 | 0.12967  |
| C  | 1.71953  | -0.33825 | 0.11587  |
| C  | 2.46810  | 1.72473  | 1.10517  |
| C  | 3.08385  | -2.20315 | -0.50677 |
| C  | 1.98122  | -2.74169 | -1.14657 |
| H  | 4.02927  | -2.73832 | -0.51697 |
| H  | 4.54466  | 1.67226  | 1.69240  |
| H  | 5.01524  | -0.57407 | 0.84066  |
| H  | 2.33084  | 2.75089  | 1.42917  |
| H  | 2.07791  | -3.69839 | -1.65238 |
| C  | 0.70774  | -2.10309 | -1.18199 |
| H  | -0.11849 | -2.56733 | -1.70952 |
| C  | 0.57760  | -0.92525 | -0.47143 |
| Cl | -2.96806 | -1.86979 | -0.75503 |
| C  | 1.46001  | 0.97277  | 0.54727  |
| C  | -1.44302 | 2.03139  | 0.80693  |
| H  | -1.49160 | 1.49947  | 1.76291  |
| C  | -0.18039 | 1.74270  | -1.90938 |
| H  | -0.61470 | 2.74185  | -1.77944 |
| P  | -0.20189 | 1.04494  | -0.18417 |
| Cu | -1.22171 | -1.00315 | 0.40199  |
| Cl | -1.25275 | -1.07506 | 2.68032  |
| C  | -1.09166 | 0.92316  | -2.82865 |
| H  | -2.09638 | 0.78447  | -2.42250 |
| H  | -1.18326 | 1.44681  | -3.78597 |
| H  | -0.66361 | -0.06480 | -3.02099 |
| C  | 1.22892  | 1.88439  | -2.48151 |
| H  | 1.15285  | 2.33256  | -3.47785 |
| H  | 1.86381  | 2.52974  | -1.86918 |
| H  | 1.72125  | 0.91361  | -2.59282 |
| C  | -2.82678 | 2.06374  | 0.16296  |
| H  | -3.50653 | 2.59710  | 0.83575  |
| H  | -2.82031 | 2.59691  | -0.79303 |
| H  | -3.23021 | 1.05969  | 0.00399  |
| C  | -0.86204 | 3.43365  | 1.03107  |
| H  | 0.07916  | 3.41350  | 1.58528  |
| H  | -0.71387 | 3.98352  | 0.09637  |
| H  | -1.58518 | 3.99574  | 1.63307  |

#### ■ X : Cl, CH<sub>3</sub>CN

#### CuCl profile compound 1 in CH<sub>3</sub>CN

Sum of electronic and zero-point Energies= -1422.695152  
 Sum of electronic and thermal Enthalpies = -1422.675638  
 Sum of electronic and thermal Free Energies = -1422.740932

|   |          |          |          |
|---|----------|----------|----------|
| P | 1.37021  | 0.26084  | -0.44547 |
| C | 1.91954  | 1.04961  | 1.19071  |
| H | 0.97103  | 1.43147  | 1.58881  |
| C | -1.91911 | 1.18281  | -0.34082 |
| C | -1.50979 | -0.14659 | 0.00181  |
| C | -3.23831 | 1.54417  | -0.51669 |
| C | -0.15899 | -0.65324 | 0.13130  |
| C | -2.60565 | -1.05830 | 0.24844  |
| C | -4.27162 | 0.60900  | -0.33426 |
| H | -3.47603 | 2.57008  | -0.77821 |
| C | 0.00375  | -1.95057 | 0.59532  |
| C | -2.35243 | -2.38080 | 0.69411  |
| C | -3.95498 | -0.66397 | 0.06320  |
| H | -5.30354 | 0.91254  | -0.48214 |
| C | -1.07004 | -2.81319 | 0.89300  |
| H | 1.00460  | -2.34656 | 0.72174  |
| H | -3.20198 | -3.03304 | 0.87856  |
| H | -4.73346 | -1.39889 | 0.24926  |
| H | -0.86823 | -3.81809 | 1.25301  |
| C | 2.60730  | -1.11751 | -0.77985 |
| H | 2.73278  | -1.77125 | 0.09162  |
| C | 2.83057  | 2.25754  | 0.95221  |
| H | 2.38776  | 2.96655  | 0.24485  |

|    |          |          |          |
|----|----------|----------|----------|
| H  | 3.00262  | 2.79064  | 1.89560  |
| H  | 3.81001  | 1.96522  | 0.56031  |
| C  | 2.50524  | 0.08830  | 2.22255  |
| H  | 3.47416  | -0.31125 | 1.90493  |
| H  | 2.66523  | 0.61249  | 3.17340  |
| H  | 1.83737  | -0.75547 | 2.42233  |
| C  | 3.97032  | -0.48713 | -1.08994 |
| H  | 3.90296  | 0.24121  | -1.90719 |
| H  | 4.40370  | 0.01786  | -0.22252 |
| H  | 4.67623  | -1.26683 | -1.40127 |
| C  | 2.13935  | -1.95248 | -1.97637 |
| H  | 2.02643  | -1.32752 | -2.87055 |
| H  | 2.88115  | -2.72711 | -2.20610 |
| H  | 1.18312  | -2.45244 | -1.79665 |
| Cl | -0.78235 | 2.51422  | -0.49211 |

#### CuCl profile compound 2 in CH<sub>3</sub>CN

Sum of electronic and zero-point Energies= -2080.354926

Sum of electronic and thermal Enthalpies = -2080.330454

Sum of electronic and thermal Free Energies = -2080.413254

|    |          |          |          |
|----|----------|----------|----------|
| C  | 2.78708  | 2.84272  | -2.04394 |
| C  | 1.72706  | 3.41699  | -1.35368 |
| C  | 1.04771  | 2.68349  | -0.34164 |
| C  | 1.55758  | 1.39629  | -0.14134 |
| C  | 3.27289  | 1.51993  | -1.81303 |
| C  | -0.04904 | 3.00271  | 0.50617  |
| C  | -0.52156 | 2.07140  | 1.42301  |
| H  | -0.52561 | 3.97724  | 0.44328  |
| H  | 3.28070  | 3.43267  | -2.81130 |
| H  | 1.42046  | 4.43124  | -1.59490 |
| H  | 4.10461  | 1.13550  | -2.39409 |
| H  | -1.36025 | 2.35129  | 2.05444  |
| C  | 0.02341  | 0.76187  | 1.59041  |
| H  | -0.40084 | 0.08441  | 2.32400  |
| C  | 1.08521  | 0.44247  | 0.78105  |
| Cl | -5.28797 | 0.85864  | 1.20218  |
| C  | 2.62969  | 0.80316  | -0.83518 |
| C  | 1.72541  | -2.12584 | -0.83643 |
| H  | 0.91934  | -1.66866 | -1.42405 |
| C  | 3.67580  | -1.21101 | 1.34269  |
| H  | 4.10451  | -2.12186 | 0.90715  |
| P  | 2.35786  | -0.71586 | 0.15383  |
| Cu | -4.24433 | -0.40904 | -0.19489 |
| Cl | -3.20459 | -1.68147 | -1.59129 |
| C  | 3.05331  | -1.54280 | 2.70477  |
| H  | 2.27308  | -2.30596 | 2.63829  |
| H  | 3.84069  | -1.92610 | 3.36168  |
| H  | 2.62750  | -0.64924 | 3.17098  |
| C  | 4.76178  | -0.13801 | 1.44543  |
| H  | 5.52670  | -0.48424 | 2.14790  |
| H  | 5.24550  | 0.04875  | 0.48297  |
| H  | 4.36056  | 0.80696  | 1.82509  |
| C  | 1.14496  | -3.23223 | 0.04718  |
| H  | 0.70014  | -3.99446 | -0.60066 |
| H  | 1.92040  | -3.71548 | 0.64885  |
| H  | 0.36129  | -2.85997 | 0.71327  |
| C  | 2.81910  | -2.63066 | -1.78298 |
| H  | 3.19554  | -1.83790 | -2.43609 |
| H  | 3.66148  | -3.06450 | -1.23507 |
| H  | 2.39309  | -3.41440 | -2.41751 |

#### CuCl profile compound I in CH<sub>3</sub>CN

Sum of electronic and zero-point Energies= -2080.354879

Sum of electronic and thermal Enthalpies = -2080.331446

Sum of electronic and thermal Free Energies = -2080.406612

|   |          |          |          |
|---|----------|----------|----------|
| C | -2.67051 | -2.66962 | -0.84493 |
| C | -3.62381 | -1.68952 | -0.89219 |
| C | -3.33012 | -0.37351 | -0.45155 |
| C | -2.01783 | -0.05179 | 0.05914  |
| C | -1.36001 | -2.33716 | -0.44776 |
| C | -4.35801 | 0.60118  | -0.50773 |
| C | -4.15279 | 1.87322  | -0.03908 |
| H | -5.31821 | 0.30899  | -0.92354 |
| H | -2.89665 | -3.68685 | -1.15016 |

|    |          |          |          |
|----|----------|----------|----------|
| H  | -4.62716 | -1.89880 | -1.25330 |
| H  | -0.61289 | -3.12025 | -0.50266 |
| H  | -4.93545 | 2.62399  | -0.08748 |
| C  | -2.92443 | 2.18831  | 0.56799  |
| H  | -2.77787 | 3.16266  | 1.02246  |
| C  | -1.91347 | 1.25388  | 0.63374  |
| Cl | -0.53079 | 1.73810  | 1.60380  |
| C  | -0.99027 | -1.06401 | -0.04136 |
| C  | 1.18094  | -1.24657 | 1.93513  |
| H  | 0.31938  | -0.81452 | 2.45720  |
| C  | 1.65586  | -2.04773 | -0.95422 |
| H  | 1.34237  | -3.05122 | -0.64680 |
| P  | 0.83834  | -0.77299 | 0.14568  |
| Cu | 1.58927  | 1.19141  | -0.50844 |
| Cl | 2.49795  | 3.03872  | -1.20537 |
| C  | 3.17660  | -1.95501 | -0.78766 |
| H  | 3.54222  | -0.94597 | -1.01345 |
| H  | 3.50566  | -2.22072 | 0.21987  |
| H  | 3.65756  | -2.64895 | -1.48659 |
| C  | 1.27051  | -1.81551 | -2.41766 |
| H  | 0.19471  | -1.90074 | -2.59271 |
| H  | 1.58980  | -0.82121 | -2.75296 |
| H  | 1.77234  | -2.55722 | -3.04956 |
| C  | 2.44094  | -0.57205 | 2.48232  |
| H  | 2.41331  | 0.51336  | 2.33959  |
| H  | 2.52269  | -0.76760 | 3.55793  |
| H  | 3.35190  | -0.95024 | 2.00863  |
| C  | 1.17251  | -2.75462 | 2.18137  |
| H  | 1.23396  | -2.94569 | 3.25910  |
| H  | 0.25440  | -3.22529 | 1.81687  |
| H  | 2.02590  | -3.25251 | 1.71036  |

#### CuCl profile TS1 in CH<sub>3</sub>CN

Sum of electronic and zero-point Energies= -2080.316209

Sum of electronic and thermal Enthalpies = -2080.292977

Sum of electronic and thermal Free Energies = -2080.367057

|    |          |          |          |
|----|----------|----------|----------|
| C  | 2.33783  | -1.94946 | -0.02241 |
| C  | 1.40244  | -0.96331 | 0.19949  |
| C  | 1.71788  | 0.42378  | 0.12561  |
| C  | 3.08907  | 0.77204  | -0.08942 |
| C  | 4.04327  | -0.25460 | -0.32664 |
| C  | 3.66192  | -1.57481 | -0.36063 |
| H  | 2.09043  | -2.99737 | 0.10748  |
| C  | 0.72240  | 1.43252  | 0.12438  |
| C  | 3.42613  | 2.14695  | -0.14800 |
| H  | 5.07891  | 0.02459  | -0.49953 |
| H  | 4.38636  | -2.35653 | -0.56912 |
| C  | 2.45498  | 3.11976  | -0.04894 |
| C  | 1.09259  | 2.76364  | 0.04155  |
| H  | 4.46573  | 2.42024  | -0.30898 |
| H  | 2.72916  | 4.16938  | -0.09970 |
| H  | 0.33783  | 3.54354  | 0.00800  |
| Cl | 0.28331  | -1.80350 | 2.00749  |
| C  | -1.81996 | 1.15728  | 1.63011  |
| H  | -1.04153 | 0.86812  | 2.34719  |
| C  | -1.76704 | 1.76117  | -1.37323 |
| H  | -1.66302 | 2.81780  | -1.09328 |
| Cu | -0.45133 | -1.46644 | -0.25643 |
| Cl | -1.69530 | -3.09647 | -1.16272 |
| P  | -0.98180 | 0.77973  | 0.00020  |
| C  | -3.25225 | 1.42789  | -1.52975 |
| H  | -3.65460 | 1.97809  | -2.38781 |
| H  | -3.40712 | 0.35970  | -1.71858 |
| H  | -3.83804 | 1.71075  | -0.65180 |
| C  | -1.00638 | 1.51100  | -2.67810 |
| H  | 0.05231  | 1.77560  | -2.60270 |
| H  | -1.07648 | 0.46007  | -2.98127 |
| H  | -1.44579 | 2.11898  | -3.47675 |
| C  | -3.03851 | 0.26364  | 1.87596  |
| H  | -2.79483 | -0.79645 | 1.75932  |
| H  | -3.39308 | 0.41478  | 2.90190  |
| H  | -3.86742 | 0.50049  | 1.20275  |
| C  | -2.13974 | 2.64021  | 1.82399  |
| H  | -2.53268 | 2.79221  | 2.83611  |
| H  | -1.25383 | 3.27213  | 1.71661  |

|   |          |         |         |
|---|----------|---------|---------|
| H | -2.90080 | 2.98802 | 1.11873 |
|---|----------|---------|---------|

#### CuCl profile compound II in CH<sub>3</sub>CN

Sum of electronic and zero-point Energies= -2080.341444

Sum of electronic and thermal Enthalpies = -2080.318134

Sum of electronic and thermal Free Energies = -2080.391892

|    |          |          |          |
|----|----------|----------|----------|
| C  | -2.97680 | -2.74062 | -0.64184 |
| C  | -3.81830 | -1.67513 | -0.41204 |
| C  | -3.30534 | -0.38649 | -0.11076 |
| C  | -1.88602 | -0.21264 | -0.08890 |
| C  | -1.57449 | -2.58331 | -0.55534 |
| C  | -4.13050 | 0.73127  | 0.16427  |
| C  | -3.56092 | 1.94662  | 0.45999  |
| H  | -5.21045 | 0.61032  | 0.14797  |
| H  | -3.38668 | -3.71882 | -0.87534 |
| H  | -4.89618 | -1.80751 | -0.46197 |
| H  | -0.93363 | -3.44763 | -0.69812 |
| H  | -4.18906 | 2.80358  | 0.68918  |
| C  | -2.15299 | 2.12356  | 0.45441  |
| H  | -1.75140 | 3.10659  | 0.66713  |
| C  | -1.31849 | 1.07145  | 0.14461  |
| Cl | 2.86174  | 1.30198  | -0.36691 |
| C  | -1.04994 | -1.33745 | -0.27505 |
| C  | 0.95380  | -1.36357 | 1.85645  |
| H  | 0.05656  | -0.93568 | 2.32279  |
| C  | 1.69413  | -1.90462 | -1.12088 |
| H  | 1.19973  | -2.88289 | -1.02720 |
| P  | 0.67772  | -0.90419 | 0.06944  |
| Cu | 0.62453  | 1.33890  | -0.08968 |
| Cl | 0.53819  | 3.59246  | -0.17987 |
| C  | 3.17105  | -2.09682 | -0.78396 |
| H  | 3.32385  | -2.48821 | 0.22426  |
| H  | 3.58650  | -2.82615 | -1.48864 |
| H  | 3.72815  | -1.16457 | -0.88475 |
| C  | 1.48491  | -1.39129 | -2.54757 |
| H  | 1.95889  | -0.41492 | -2.68476 |
| H  | 1.94480  | -2.09520 | -3.24931 |
| H  | 0.42568  | -1.30532 | -2.80833 |
| C  | 2.18064  | -0.70914 | 2.49096  |
| H  | 2.19126  | -0.96136 | 3.55707  |
| H  | 3.11479  | -1.06670 | 2.05065  |
| H  | 2.15432  | 0.37950  | 2.40024  |
| C  | 0.92870  | -2.88160 | 2.05980  |
| H  | 1.80204  | -3.37095 | 1.62028  |
| H  | 0.94235  | -3.08250 | 3.13684  |
| H  | 0.02589  | -3.34347 | 1.65140  |

#### CuCl profile TS2 in CH<sub>3</sub>CN

Sum of electronic and zero-point Energies= -2080.320376

Sum of electronic and thermal Enthalpies = -2080.296675

Sum of electronic and thermal Free Energies = -2080.373315

|    |          |          |          |
|----|----------|----------|----------|
| C  | 3.75787  | 1.04023  | 1.25428  |
| C  | 4.00389  | -0.23603 | 0.77407  |
| C  | 2.97284  | -0.98303 | 0.14354  |
| C  | 1.71047  | -0.36100 | 0.12765  |
| C  | 2.49721  | 1.68521  | 1.12525  |
| C  | 3.04633  | -2.24427 | -0.50517 |
| C  | 1.94064  | -2.75323 | -1.16370 |
| H  | 3.98245  | -2.79559 | -0.51384 |
| H  | 4.56960  | 1.59004  | 1.72178  |
| H  | 4.99902  | -0.66313 | 0.86383  |
| H  | 2.37860  | 2.71486  | 1.44529  |
| H  | 2.02485  | -3.70396 | -1.68283 |
| C  | 0.68042  | -2.08882 | -1.20447 |
| H  | -0.14520 | -2.52836 | -1.75365 |
| C  | 0.56300  | -0.92117 | -0.47518 |
| Cl | -3.03177 | -1.89092 | -0.71362 |
| C  | 1.47670  | 0.95374  | 0.56247  |
| C  | -1.39798 | 2.06428  | 0.81850  |
| H  | -1.42844 | 1.52690  | 1.77254  |
| C  | -0.10888 | 1.77313  | -1.90930 |
| H  | -0.44224 | 2.80964  | -1.77344 |
| P  | -0.17147 | 1.07633  | -0.18738 |

|    |          |          |          |
|----|----------|----------|----------|
| Cu | -1.24785 | -0.96615 | 0.36189  |
| Cl | -1.25633 | -1.09721 | 2.65919  |
| C  | -1.10327 | 1.04342  | -2.81852 |
| H  | -2.11769 | 1.02302  | -2.41364 |
| H  | -1.13835 | 1.56512  | -3.78061 |
| H  | -0.78166 | 0.01371  | -3.00149 |
| C  | 1.29946  | 1.77922  | -2.50100 |
| H  | 1.25224  | 2.24775  | -3.48962 |
| H  | 2.00439  | 2.34925  | -1.89087 |
| H  | 1.68791  | 0.76496  | -2.63396 |
| C  | -2.79352 | 2.09947  | 0.20163  |
| H  | -3.45978 | 2.63075  | 0.88948  |
| H  | -2.80128 | 2.63636  | -0.75183 |
| H  | -3.19856 | 1.09555  | 0.04505  |
| C  | -0.81815 | 3.46657  | 1.04280  |
| H  | 0.14543  | 3.44655  | 1.55718  |
| H  | -0.71395 | 4.03122  | 0.11170  |
| H  | -1.52220 | 4.01064  | 1.68296  |

### Profiles with Gold

#### ▪ X : I, DCM

##### AuI profile compound 1 in DCM

Sum of electronic and zero-point Energies= -973.983712

Sum of electronic and thermal Enthalpies = -973.963549

Sum of electronic and thermal Free Energies = -974.031624

|   |          |          |          |
|---|----------|----------|----------|
| P | -1.51063 | -0.04332 | -0.39444 |
| C | -2.15884 | -0.84876 | 1.19749  |
| H | -1.22973 | -1.05984 | 1.74184  |
| C | 1.90721  | -0.16097 | -0.23878 |
| C | 1.17494  | 1.02310  | 0.09533  |
| C | 3.25244  | -0.14507 | -0.54307 |
| C | -0.25399 | 1.17303  | 0.27348  |
| C | 1.99772  | 2.20170  | 0.27090  |
| C | 3.99532  | 1.04880  | -0.47919 |
| H | 3.76006  | -1.06889 | -0.79912 |
| C | -0.72769 | 2.37595  | 0.77560  |
| C | 1.43309  | 3.40555  | 0.76558  |
| C | 3.38114  | 2.19040  | -0.03682 |
| H | 5.05134  | 1.03760  | -0.73193 |
| C | 0.09902  | 3.48163  | 1.05798  |
| H | -1.79426 | 2.50492  | 0.92284  |
| H | 2.08976  | 4.26009  | 0.90681  |
| H | 3.94230  | 3.11233  | 0.09128  |
| H | -0.33584 | 4.39344  | 1.45741  |
| C | -2.89777 | 1.08978  | -0.98190 |
| H | -3.26099 | 1.73136  | -0.17017 |
| C | -2.81855 | -2.19722 | 0.88797  |
| H | -2.17066 | -2.83243 | 0.27497  |
| H | -3.03236 | -2.73522 | 1.81997  |
| H | -3.76757 | -2.08052 | 0.35510  |
| C | -3.04147 | 0.01801  | 2.09344  |
| H | -3.98482 | 0.28742  | 1.60658  |
| H | -3.29609 | -0.53200 | 3.00852  |
| H | -2.53883 | 0.94008  | 2.39965  |
| C | -4.07257 | 0.23024  | -1.46201 |
| H | -3.75814 | -0.49697 | -2.22017 |
| H | -4.54955 | -0.31888 | -0.64566 |
| H | -4.83914 | 0.87005  | -1.91634 |
| C | -2.39139 | 1.97037  | -2.12790 |
| H | -2.02145 | 1.36050  | -2.96090 |
| H | -3.20784 | 2.59418  | -2.51205 |
| H | -1.58182 | 2.63725  | -1.81754 |
| I | 1.13044  | -2.17158 | -0.07893 |

##### AuI profile compound 2 in DCM

Sum of electronic and zero-point Energies= -1121.379672

Sum of electronic and thermal Enthalpies = -1121.354310

Sum of electronic and thermal Free Energies = -1121.443237

|    |          |          |          |
|----|----------|----------|----------|
| C  | 5.50665  | 2.18537  | 1.15089  |
| C  | 4.77402  | 1.97850  | 2.31273  |
| C  | 3.68881  | 1.05940  | 2.32403  |
| C  | 3.47675  | 0.42335  | 1.09631  |
| C  | 5.25105  | 1.52109  | -0.08667 |
| C  | 2.77849  | 0.65853  | 3.34092  |
| C  | 1.78988  | -0.27858 | 3.06816  |
| H  | 2.84817  | 1.08463  | 4.33804  |
| H  | 6.32604  | 2.89834  | 1.17939  |
| H  | 5.03440  | 2.52949  | 3.21237  |
| H  | 5.86347  | 1.73631  | -0.95616 |
| H  | 1.11102  | -0.55876 | 3.86865  |
| C  | 1.60230  | -0.90097 | 1.79653  |
| H  | 0.80250  | -1.61961 | 1.65400  |
| C  | 2.47814  | -0.52696 | 0.80772  |
| I  | -2.61933 | -2.42773 | 0.54904  |
| C  | 4.21098  | 0.62511  | -0.08811 |
| C  | 2.02451  | 0.17728  | -2.19075 |
| H  | 1.56782  | 1.02412  | -1.66307 |
| C  | 3.84141  | -2.17072 | -1.47760 |
| H  | 3.84910  | -2.08893 | -2.57216 |
| P  | 3.10263  | -0.57918 | -0.91332 |
| I  | -2.03828 | 2.73113  | -0.49933 |
| C  | 2.94597  | -3.34461 | -1.05936 |
| H  | 1.91232  | -3.23530 | -1.39763 |
| H  | 3.34628  | -4.26223 | -1.50177 |
| H  | 2.94314  | -3.46736 | 0.02780  |
| C  | 5.27578  | -2.33159 | -0.96914 |
| H  | 5.31537  | -2.35200 | 0.12453  |
| H  | 5.67187  | -3.28426 | -1.33511 |
| H  | 5.93152  | -1.53317 | -1.32640 |
| C  | 0.92625  | -0.77771 | -2.66367 |
| H  | 0.28917  | -0.24343 | -3.37534 |
| H  | 1.34065  | -1.64991 | -3.17819 |
| H  | 0.28909  | -1.11706 | -1.84259 |
| C  | 2.89054  | 0.70274  | -3.34149 |
| H  | 3.63795  | 1.42429  | -2.99900 |
| H  | 3.40122  | -0.10842 | -3.87099 |
| H  | 2.24073  | 1.21089  | -4.06088 |
| Au | -2.33136 | 0.15466  | 0.03312  |

#### AuI profile compound I in DCM

Sum of electronic and zero-point Energies= -1121.377263  
Sum of electronic and thermal Enthalpies = -1121.352808  
Sum of electronic and thermal Free Energies = -1121.433642

|   |          |          |          |
|---|----------|----------|----------|
| C | 4.40999  | 0.86678  | -1.63840 |
| C | 4.37114  | -0.44673 | -2.01983 |
| C | 3.36942  | -1.31958 | -1.52052 |
| C | 2.38800  | -0.83752 | -0.57655 |
| C | 3.35399  | 1.38126  | -0.85988 |
| C | 3.37290  | -2.67133 | -1.94613 |
| C | 2.47616  | -3.57227 | -1.43314 |
| H | 4.11176  | -2.97616 | -2.68209 |
| H | 5.19585  | 1.53011  | -1.98637 |
| H | 5.11260  | -0.85360 | -2.70216 |
| H | 3.33117  | 2.45288  | -0.69789 |
| H | 2.46057  | -4.60466 | -1.76869 |
| C | 1.62473  | -3.16904 | -0.38644 |
| H | 1.01168  | -3.91154 | 0.11314  |
| C | 1.61137  | -1.86084 | 0.05145  |
| I | 0.62195  | -1.61575 | 1.94818  |
| C | 2.32383  | 0.59232  | -0.37196 |
| C | 1.13049  | 2.05525  | 1.95440  |
| H | 1.59141  | 1.15962  | 2.38503  |
| C | 0.77347  | 3.05503  | -0.89186 |
| H | 1.69901  | 3.61779  | -0.72344 |
| P | 0.81775  | 1.52183  | 0.18227  |
| I | -3.48889 | -0.75757 | -0.77926 |
| C | -0.40624 | 3.94416  | -0.48633 |
| H | -1.35710 | 3.40464  | -0.56528 |
| H | -0.31326 | 4.33161  | 0.53105  |
| H | -0.45287 | 4.80460  | -1.16353 |
| C | 0.66845  | 2.67464  | -2.37026 |
| H | 1.51056  | 2.06805  | -2.71345 |
| H | -0.25489 | 2.11596  | -2.56195 |

|    |          |         |          |
|----|----------|---------|----------|
| H  | 0.64201  | 3.58651 | -2.97755 |
| C  | -0.16729 | 2.32479 | 2.71906  |
| H  | -0.85825 | 1.47850 | 2.65228  |
| H  | 0.06502  | 2.48996 | 3.77751  |
| H  | -0.68733 | 3.21481 | 2.35339  |
| C  | 2.12803  | 3.20808 | 2.07623  |
| H  | 2.34875  | 3.37632 | 3.13645  |
| H  | 3.07677  | 2.99090 | 1.57684  |
| H  | 1.72932  | 4.14400 | 1.67310  |
| Au | -1.15003 | 0.39479 | -0.20433 |

#### AuI profile TS1 in DCM

Sum of electronic and zero-point Energies= -1121.351087  
Sum of electronic and thermal Enthalpies = -1121.326910  
Sum of electronic and thermal Free Energies = -1121.407316

|    |          |          |          |
|----|----------|----------|----------|
| C  | 0.03333  | -2.61239 | -0.92298 |
| C  | 0.59221  | -1.47023 | -0.38098 |
| C  | 1.92459  | -1.06258 | -0.71436 |
| C  | 2.72117  | -1.97238 | -1.48007 |
| C  | 2.13132  | -3.15306 | -2.00674 |
| C  | 0.80162  | -3.42413 | -1.79014 |
| H  | -0.96171 | -2.92952 | -0.63283 |
| C  | 2.44595  | 0.22451  | -0.40869 |
| C  | 4.06802  | -1.62501 | -1.75507 |
| H  | 2.74507  | -3.82567 | -2.59936 |
| H  | 0.34038  | -4.31055 | -2.21593 |
| C  | 4.58909  | -0.41817 | -1.34749 |
| C  | 3.76048  | 0.53182  | -0.71532 |
| H  | 4.67670  | -2.32313 | -2.32387 |
| H  | 5.62212  | -0.16537 | -1.56694 |
| H  | 4.15577  | 1.52309  | -0.51512 |
| I  | 0.08155  | -1.70571 | 2.10652  |
| C  | 1.56056  | 1.90248  | 1.91158  |
| H  | 1.78018  | 0.91787  | 2.34191  |
| C  | 1.48770  | 2.93819  | -0.96857 |
| H  | 2.53306  | 3.23569  | -0.80980 |
| I  | -3.44861 | 0.15069  | -0.73155 |
| P  | 1.21584  | 1.46468  | 0.13068  |
| C  | 0.57008  | 4.10151  | -0.58504 |
| H  | 0.71940  | 4.92362  | -1.29369 |
| H  | -0.48567 | 3.81165  | -0.63040 |
| H  | 0.77952  | 4.48633  | 0.41594  |
| C  | 1.29133  | 2.54244  | -2.43390 |
| H  | 1.94950  | 1.72481  | -2.74088 |
| H  | 0.25531  | 2.23920  | -2.62343 |
| H  | 1.50989  | 3.40524  | -3.07272 |
| C  | 0.32438  | 2.45755  | 2.62389  |
| H  | -0.53542 | 1.78949  | 2.51681  |
| H  | 0.54281  | 2.55524  | 3.69315  |
| H  | 0.03848  | 3.44583  | 2.25290  |
| C  | 2.78931  | 2.79765  | 2.08472  |
| H  | 2.98294  | 2.93107  | 3.15516  |
| H  | 3.68766  | 2.35828  | 1.64198  |
| H  | 2.63923  | 3.79155  | 1.65165  |
| Au | -0.77602 | 0.25712  | -0.22966 |

#### AuI profile compound II in DCM

Sum of electronic and zero-point Energies= -1121.400977  
Sum of electronic and thermal Enthalpies = -1121.376812  
Sum of electronic and thermal Free Energies = -1121.455682

|   |          |          |          |
|---|----------|----------|----------|
| C | -5.06417 | 0.22891  | -0.78790 |
| C | -4.84891 | 1.56960  | -0.56912 |
| C | -3.56536 | 2.05940  | -0.21537 |
| C | -2.47556 | 1.13501  | -0.12240 |
| C | -4.00826 | -0.69537 | -0.63236 |
| C | -3.32992 | 3.43062  | 0.04968  |
| C | -2.07250 | 3.85258  | 0.40322  |
| H | -4.15658 | 4.13258  | -0.02123 |
| H | -6.05113 | -0.13066 | -1.06312 |
| H | -5.66600 | 2.28026  | -0.66501 |
| H | -4.21253 | -1.75320 | -0.76634 |
| H | -1.88749 | 4.89949  | 0.62827  |
| C | -0.98625 | 2.94511  | 0.45775  |
| H | -0.00831 | 3.33409  | 0.71260  |

|    |          |          |          |
|----|----------|----------|----------|
| C  | -1.15829 | 1.60837  | 0.16425  |
| I  | 2.42301  | -1.64759 | -0.19049 |
| C  | -2.74362 | -0.24778 | -0.30136 |
| C  | -1.61320 | -1.86504 | 1.85994  |
| H  | -1.86911 | -0.90787 | 2.33387  |
| C  | -1.38280 | -2.70282 | -1.13747 |
| H  | -2.45636 | -2.93817 | -1.14897 |
| P  | -1.33248 | -1.31778 | 0.10018  |
| I  | 2.40313  | 2.16647  | -0.01445 |
| C  | -0.63098 | -3.97913 | -0.76348 |
| H  | -0.94082 | -4.37952 | 0.20444  |
| H  | -0.85207 | -4.73837 | -1.52196 |
| H  | 0.44915  | -3.82304 | -0.74655 |
| C  | -0.98943 | -2.17516 | -2.51957 |
| H  | 0.07764  | -1.93630 | -2.55954 |
| H  | -1.19202 | -2.94923 | -3.26732 |
| H  | -1.55683 | -1.28255 | -2.80074 |
| C  | -0.35873 | -2.41218 | 2.54044  |
| H  | -0.58971 | -2.60155 | 3.59443  |
| H  | -0.02404 | -3.35330 | 2.09697  |
| H  | 0.46875  | -1.69968 | 2.49847  |
| C  | -2.81134 | -2.80824 | 1.99394  |
| H  | -2.61798 | -3.78440 | 1.54020  |
| H  | -3.00543 | -2.97184 | 3.05964  |
| H  | -3.72221 | -2.39161 | 1.55571  |
| Au | 0.40824  | 0.24807  | 0.04018  |

#### AuI profile TS2 in DCM

Sum of electronic and zero-point Energies= -1121.337080  
 Sum of electronic and thermal Enthalpies = -1121.312716  
 Sum of electronic and thermal Free Energies = -1121.394974

|    |          |          |          |
|----|----------|----------|----------|
| C  | -4.76793 | 0.99069  | 0.48850  |
| C  | -4.57552 | 1.23837  | -0.86132 |
| C  | -3.39198 | 0.79993  | -1.51367 |
| C  | -2.43708 | 0.20585  | -0.67098 |
| C  | -3.83595 | 0.26950  | 1.28452  |
| C  | -3.06613 | 0.81032  | -2.89627 |
| C  | -1.91982 | 0.17537  | -3.34537 |
| H  | -3.74044 | 1.27553  | -3.60984 |
| H  | -5.68865 | 1.32676  | 0.95648  |
| H  | -5.34719 | 1.74974  | -1.43021 |
| H  | -4.08015 | 0.02214  | 2.31189  |
| H  | -1.71206 | 0.15411  | -4.41147 |
| C  | -0.98928 | -0.46411 | -2.47978 |
| H  | -0.12226 | -0.96678 | -2.89515 |
| C  | -1.21238 | -0.35057 | -1.11478 |
| I  | 3.27064  | -0.84579 | -0.61019 |
| C  | -2.65872 | -0.10721 | 0.67862  |
| C  | -0.36192 | -1.17852 | 2.44879  |
| H  | 0.06278  | -0.17133 | 2.51693  |
| C  | -1.65388 | -2.98443 | 0.41751  |
| H  | -1.71143 | -3.43858 | 1.41480  |
| P  | -1.21570 | -1.21477 | 0.77951  |
| I  | 0.61781  | 2.81024  | 0.77685  |
| C  | -0.52259 | -3.64897 | -0.37493 |
| H  | 0.45851  | -3.52481 | 0.08964  |
| H  | -0.72679 | -4.72256 | -0.44225 |
| H  | -0.47347 | -3.25017 | -1.39239 |
| C  | -3.00409 | -3.13829 | -0.27893 |
| H  | -3.19791 | -4.20652 | -0.42280 |
| H  | -3.82596 | -2.72318 | 0.30946  |
| H  | -3.00689 | -2.66672 | -1.26603 |
| C  | 0.74705  | -2.21591 | 2.59784  |
| H  | 1.22667  | -2.06369 | 3.57050  |
| H  | 0.35717  | -3.23829 | 2.57885  |
| H  | 1.51722  | -2.11348 | 1.82919  |
| C  | -1.45241 | -1.33447 | 3.51839  |
| H  | -2.16171 | -0.50428 | 3.51515  |
| H  | -2.00012 | -2.27817 | 3.42733  |
| H  | -0.95485 | -1.33630 | 4.49465  |
| Au | 0.73279  | 0.15668  | -0.24125 |

#### X : Br, DCM

##### AuBr profile compound 1 in DCM

Sum of electronic and zero-point Energies= -975.947529  
 Sum of electronic and thermal Enthalpies = -975.927432  
 Sum of electronic and thermal Free Energies = -975.994886

|    |          |          |          |
|----|----------|----------|----------|
| P  | -1.43653 | -0.10359 | -0.40428 |
| C  | -2.01161 | -0.82429 | 1.25634  |
| H  | -1.06247 | -1.12723 | 1.71559  |
| C  | 1.94175  | -0.72593 | -0.22339 |
| C  | 1.39583  | 0.56641  | 0.05153  |
| C  | 3.28556  | -0.96509 | -0.40528 |
| C  | 0.00397  | 0.95274  | 0.16666  |
| C  | 2.40038  | 1.59392  | 0.23934  |
| C  | 4.22108  | 0.07863  | -0.29122 |
| H  | 3.63055  | -1.97192 | -0.61366 |
| C  | -0.27707 | 2.24613  | 0.58173  |
| C  | 2.02472  | 2.90373  | 0.63341  |
| C  | 3.78000  | 1.32963  | 0.05054  |
| H  | 5.27635  | -0.12712 | -0.44261 |
| C  | 0.70975  | 3.21915  | 0.83512  |
| H  | -1.31084 | 2.55169  | 0.69249  |
| H  | 2.80966  | 3.64199  | 0.77515  |
| H  | 4.48088  | 2.14813  | 0.19030  |
| H  | 0.41530  | 4.21402  | 1.15710  |
| C  | -2.74474 | 1.17226  | -0.86449 |
| H  | -2.94675 | 1.86352  | -0.03803 |
| C  | -2.84127 | -2.09485 | 1.04902  |
| H  | -2.32613 | -2.81339 | 0.40336  |
| H  | -3.02841 | -2.58475 | 2.01281  |
| H  | -3.81535 | -1.88360 | 0.59668  |
| C  | -2.69839 | 0.15270  | 2.20876  |
| H  | -3.67100 | 0.48272  | 1.82838  |
| H  | -2.87751 | -0.33258 | 3.17676  |
| H  | -2.08700 | 1.04030  | 2.39824  |
| C  | -4.05292 | 0.44122  | -1.18918 |
| H  | -3.90602 | -0.33238 | -1.95240 |
| H  | -4.49592 | -0.03254 | -0.30909 |
| H  | -4.78820 | 1.15484  | -1.58096 |
| C  | -2.27619 | 1.96657  | -2.08771 |
| H  | -2.09110 | 1.30043  | -2.93901 |
| H  | -3.04902 | 2.68353  | -2.39098 |
| H  | -1.35671 | 2.52842  | -1.89920 |
| Br | 0.87379  | -2.36937 | -0.25097 |

##### AuBr profile compound 2 in DCM

Sum of electronic and zero-point Energies= -1125.292922  
 Sum of electronic and thermal Enthalpies = -1125.267769  
 Sum of electronic and thermal Free Energies = -1125.356273

|    |          |          |          |
|----|----------|----------|----------|
| C  | -4.70344 | 2.98327  | -0.00069 |
| C  | -3.93222 | 3.14589  | -1.14440 |
| C  | -3.09451 | 2.09130  | -1.60197 |
| C  | -3.15142 | 0.94180  | -0.80702 |
| C  | -4.72620 | 1.79393  | 0.78886  |
| C  | -2.20486 | 1.98051  | -2.70609 |
| C  | -1.48801 | 0.80891  | -2.91513 |
| H  | -2.07772 | 2.81197  | -3.39389 |
| H  | -5.32856 | 3.81200  | 0.31999  |
| H  | -3.97156 | 4.08800  | -1.68443 |
| H  | -5.35033 | 1.74117  | 1.67484  |
| H  | -0.81584 | 0.76177  | -3.76739 |
| C  | -1.57060 | -0.34269 | -2.07511 |
| H  | -0.97419 | -1.22151 | -2.29602 |
| C  | -2.42917 | -0.25074 | -1.00778 |
| Br | 3.47021  | -1.99253 | -0.98895 |
| C  | -3.92809 | 0.76509  | 0.35451  |
| C  | -2.09175 | -1.09716 | 1.95833  |
| H  | -1.48295 | -0.18535 | 1.90838  |
| C  | -4.33954 | -2.34936 | 0.28733  |
| H  | -4.46802 | -2.75590 | 1.29837  |
| P  | -3.20679 | -0.91250 | 0.51110  |
| Br | 2.16861  | 2.28299  | 1.17278  |
| C  | -3.67571 | -3.40250 | -0.60996 |
| H  | -2.69575 | -3.71931 | -0.24289 |



|    |          |          |          |
|----|----------|----------|----------|
| H  | -4.32008 | -4.28657 | -0.64551 |
| H  | -3.55839 | -3.02882 | -1.63163 |
| C  | -5.69998 | -1.90548 | -0.25557 |
| H  | -6.33489 | -2.78987 | -0.37035 |
| H  | -6.20614 | -1.21134 | 0.42033  |
| H  | -5.60828 | -1.43047 | -1.23743 |
| C  | -1.17657 | -2.31827 | 1.83729  |
| H  | -0.47102 | -2.30454 | 2.67419  |
| H  | -1.74022 | -3.25454 | 1.89123  |
| H  | -0.59161 | -2.30857 | 0.91324  |
| C  | -2.90384 | -1.09109 | 3.25763  |
| H  | -3.54302 | -0.20724 | 3.34416  |
| H  | -3.52596 | -1.98652 | 3.35349  |
| H  | -2.20583 | -1.07986 | 4.10065  |
| Au | 2.81910  | 0.14628  | 0.08998  |

#### AuBr profile compound I in DCM

Sum of electronic and zero-point Energies= -1125.297709

Sum of electronic and thermal Enthalpies = -1125.273590

Sum of electronic and thermal Free Energies = -1125.352855

|    |          |          |          |
|----|----------|----------|----------|
| C  | 4.05767  | 1.41398  | -1.40708 |
| C  | 4.35963  | 0.09292  | -1.59484 |
| C  | 3.54959  | -0.92378 | -1.02607 |
| C  | 2.40084  | -0.57335 | -0.22316 |
| C  | 2.85230  | 1.75512  | -0.76155 |
| C  | 3.90981  | -2.27788 | -1.23840 |
| C  | 3.21105  | -3.29635 | -0.64334 |
| H  | 4.76381  | -2.48734 | -1.87625 |
| H  | 4.69397  | 2.19789  | -1.80601 |
| H  | 5.23194  | -0.20673 | -2.16962 |
| H  | 2.57686  | 2.80322  | -0.74785 |
| H  | 3.47487  | -4.33541 | -0.81389 |
| C  | 2.18777  | -2.98096 | 0.27011  |
| H  | 1.71158  | -3.77374 | 0.83668  |
| C  | 1.83001  | -1.67001 | 0.48824  |
| Br | 0.67186  | -1.41791 | 2.04394  |
| C  | 1.99172  | 0.81281  | -0.21986 |
| C  | 0.38305  | 2.12681  | 1.91774  |
| H  | 1.00519  | 1.38318  | 2.42682  |
| C  | 0.00786  | 2.86711  | -0.99944 |
| H  | 0.78651  | 3.61434  | -0.81171 |
| P  | 0.28758  | 1.43687  | 0.17391  |
| Br | -3.28726 | -1.58603 | -0.83094 |
| C  | -1.35146 | 3.51773  | -0.72043 |
| H  | -2.16965 | 2.79683  | -0.83068 |
| H  | -1.41421 | 3.95889  | 0.27714  |
| H  | -1.51435 | 4.32204  | -1.44679 |
| C  | 0.08271  | 2.40499  | -2.45674 |
| H  | 1.05157  | 1.97242  | -2.71865 |
| H  | -0.69178 | 1.65910  | -2.66979 |
| H  | -0.08985 | 3.26379  | -3.11521 |
| C  | -0.97637 | 2.15645  | 2.61911  |
| H  | -1.47333 | 1.18198  | 2.58276  |
| H  | -0.83268 | 2.42309  | 3.67247  |
| H  | -1.65425 | 2.89467  | 2.18136  |
| C  | 1.11012  | 3.47138  | 1.99262  |
| H  | 1.23139  | 3.75004  | 3.04552  |
| H  | 2.11070  | 3.42516  | 1.55218  |
| H  | 0.55078  | 4.27433  | 1.50281  |
| Au | -1.38939 | -0.06221 | -0.25464 |

#### AuBr profile TS1 in DCM

Sum of electronic and zero-point Energies= -1125.265009

Sum of electronic and thermal Enthalpies = -1125.241145

Sum of electronic and thermal Free Energies = -1125.319241

|   |          |          |          |
|---|----------|----------|----------|
| C | -0.24633 | -2.79427 | -0.23238 |
| C | 0.31294  | -1.56263 | 0.02879  |
| C | 1.67839  | -1.27360 | -0.26495 |
| C | 2.49991  | -2.35316 | -0.72059 |
| C | 1.91073  | -3.61882 | -0.98116 |
| C | 0.56180  | -3.81054 | -0.79645 |
| H | -1.26971 | -3.01336 | 0.04824  |
| C | 2.21911  | 0.03692  | -0.20260 |
| C | 3.87329  | -2.09343 | -0.95951 |

|    |          |          |          |
|----|----------|----------|----------|
| H  | 2.54060  | -4.42751 | -1.34079 |
| H  | 0.10468  | -4.77177 | -1.01313 |
| C  | 4.39964  | -0.83107 | -0.80062 |
| C  | 3.56119  | 0.25114  | -0.46021 |
| H  | 4.50302  | -2.91180 | -1.29886 |
| H  | 5.45373  | -0.65129 | -0.98944 |
| H  | 3.97092  | 1.25648  | -0.43983 |
| Br | -0.26341 | -1.21558 | 2.39041  |
| C  | 1.22016  | 2.14591  | 1.67815  |
| H  | 1.39611  | 1.26665  | 2.30983  |
| C  | 1.33628  | 2.58514  | -1.35593 |
| H  | 2.37538  | 2.90409  | -1.19441 |
| Br | -3.45555 | -0.17335 | -0.80407 |
| P  | 0.98802  | 1.36527  | 0.00113  |
| C  | 0.41455  | 3.80389  | -1.27498 |
| H  | 0.62841  | 4.46871  | -2.11894 |
| H  | -0.63985 | 3.51301  | -1.34043 |
| H  | 0.55804  | 4.37800  | -0.35649 |
| C  | 1.22870  | 1.89792  | -2.71919 |
| H  | 1.90135  | 1.04081  | -2.81158 |
| H  | 0.20553  | 1.55381  | -2.90816 |
| H  | 1.49073  | 2.61504  | -3.50479 |
| C  | -0.04917 | 2.83795  | 2.18011  |
| H  | -0.90593 | 2.15792  | 2.17449  |
| H  | 0.11031  | 3.16638  | 3.21313  |
| H  | -0.30597 | 3.72074  | 1.58781  |
| C  | 2.45212  | 3.05232  | 1.73897  |
| H  | 2.58884  | 3.39281  | 2.77146  |
| H  | 3.36559  | 2.52833  | 1.44306  |
| H  | 2.33869  | 3.94051  | 1.11031  |
| Au | -1.00388 | 0.15650  | -0.25348 |

#### AuBr profile compound II in DCM

Sum of electronic and zero-point Energies= -1125.317841

Sum of electronic and thermal Enthalpies = -1125.293948

Sum of electronic and thermal Free Energies = -1125.371279

|    |          |          |          |
|----|----------|----------|----------|
| C  | 4.74203  | 0.37911  | -0.60461 |
| C  | 4.69942  | -0.98141 | -0.40499 |
| C  | 3.47715  | -1.64519 | -0.12543 |
| C  | 2.27114  | -0.87524 | -0.07382 |
| C  | 3.56359  | 1.15025  | -0.50498 |
| C  | 3.41071  | -3.04307 | 0.09401  |
| C  | 2.20192  | -3.63965 | 0.35484  |
| H  | 4.32647  | -3.62701 | 0.05617  |
| H  | 5.68376  | 0.87226  | -0.82636 |
| H  | 5.60927  | -1.57359 | -0.46327 |
| H  | 3.62518  | 2.22596  | -0.63784 |
| H  | 2.14613  | -4.70980 | 0.53536  |
| C  | 1.00372  | -2.88415 | 0.37478  |
| H  | 0.06759  | -3.39893 | 0.55463  |
| C  | 1.01765  | -1.52511 | 0.14265  |
| Br | -2.76076 | 1.14590  | -0.21054 |
| C  | 2.35794  | 0.53263  | -0.23361 |
| C  | 0.92558  | 2.07125  | 1.80942  |
| H  | 1.31877  | 1.19251  | 2.33869  |
| C  | 0.66215  | 2.70480  | -1.23748 |
| H  | 1.68172  | 3.11575  | -1.23951 |
| P  | 0.79430  | 1.40068  | 0.07493  |
| Br | -2.29011 | -2.39429 | -0.00577 |
| C  | -0.31385 | 3.84504  | -0.95339 |
| H  | -0.09412 | 4.35898  | -0.01472 |
| H  | -0.22676 | 4.57928  | -1.76210 |
| H  | -1.34637 | 3.49076  | -0.92476 |
| C  | 0.40240  | 2.04342  | -2.59347 |
| H  | -0.60776 | 1.62515  | -2.63915 |
| H  | 0.49003  | 2.79980  | -3.38061 |
| H  | 1.11941  | 1.24677  | -2.81418 |
| C  | -0.41452 | 2.44879  | 2.44049  |
| H  | -0.23505 | 2.73104  | 3.48375  |
| H  | -0.88421 | 3.29849  | 1.93903  |
| H  | -1.12194 | 1.61638  | 2.43278  |
| C  | 1.95330  | 3.20179  | 1.91424  |
| H  | 1.62064  | 4.10814  | 1.40075  |
| H  | 2.08393  | 3.45047  | 2.97296  |
| H  | 2.93316  | 2.91604  | 1.52386  |

Au -0.69729 -0.38398 0.01923

**AuBr profile TS2 in DCM**

Sum of electronic and zero-point Energies= -1125.243970

Sum of electronic and thermal Enthalpies = -1125.219963

Sum of electronic and thermal Free Energies = -1125.299675

|    |          |          |          |
|----|----------|----------|----------|
| C  | -4.37502 | -0.50769 | 1.58933  |
| C  | -4.10295 | 0.80661  | 1.93178  |
| C  | -2.94951 | 1.46329  | 1.42192  |
| C  | -2.09830 | 0.65325  | 0.64969  |
| C  | -3.56114 | -1.25929 | 0.69645  |
| C  | -2.57350 | 2.82825  | 1.52202  |
| C  | -1.48122 | 3.30101  | 0.81278  |
| H  | -3.16653 | 3.51315  | 2.12176  |
| H  | -5.27002 | -0.97807 | 1.98619  |
| H  | -4.78950 | 1.34851  | 2.57662  |
| H  | -3.86795 | -2.25358 | 0.38986  |
| H  | -1.23140 | 4.35679  | 0.87070  |
| C  | -0.65580 | 2.47360  | 0.00393  |
| H  | 0.18200  | 2.90495  | -0.53308 |
| C  | -0.92133 | 1.11055  | 0.00031  |
| Br | 3.00812  | 1.52591  | -0.67281 |
| C  | -2.41320 | -0.65337 | 0.24159  |
| C  | -0.32409 | -2.38409 | -1.24521 |
| H  | 0.07033  | -2.62921 | -0.25284 |
| C  | -1.66111 | -0.12688 | -2.69190 |

|    |          |          |          |
|----|----------|----------|----------|
| H  | -1.76427 | -1.06271 | -3.25485 |
| P  | -1.09450 | -0.69222 | -1.01059 |
| Br | 1.46487  | -1.78940 | 2.04649  |
| C  | -0.57077 | 0.72971  | -3.34539 |
| H  | 0.41048  | 0.24866  | -3.34594 |
| H  | -0.85147 | 0.91824  | -4.38688 |
| H  | -0.47652 | 1.69514  | -2.84053 |
| C  | -3.00819 | 0.59069  | -2.66164 |
| H  | -3.27779 | 0.86092  | -3.68820 |
| H  | -3.80571 | -0.03806 | -2.25805 |
| H  | -2.96149 | 1.51601  | -2.07925 |
| C  | 0.80970  | -2.40516 | -2.26670 |
| H  | 1.21802  | -3.42060 | -2.30587 |
| H  | 0.46159  | -2.14855 | -3.27183 |
| H  | 1.62477  | -1.72940 | -1.99263 |
| C  | -1.44820 | -3.36735 | -1.59792 |
| H  | -2.22871 | -3.40745 | -0.83424 |
| H  | -1.91011 | -3.15532 | -2.56700 |
| H  | -1.00058 | -4.36589 | -1.65923 |
| Au | 1.01905  | 0.10017  | 0.30430  |

## 8. References

---

- [1] Bontemps, S.; Devillard, M.; Mallet-Ladeira, S.; Bouhadir, G.; Miqueu, K.; Bourissou, D. *Inorg. Chem.* **2013**, *52*, 4714-4720.
- [2] Blons, C.; Duval, M.; Delcroix, D.; Olivier-Bourbigou, H.; Mallet-Ladeira, S.; Sosa Carrizo, E.D.; Miqueu, K.; Amgoune, A.; Bourissou, D. *Chem. Eur. J.* **2018**, *24*, 11922-11925.
- [3] Bousquet, L. PhD Thesis : Synthesis and Reactivity of carbon divalentes species : Bis-Ylures and Yldiures, Université Paul Sabatier, **2017**
- [4] Guenther, J.; Mallet-Ladeira, S.; Estevez, L.; Miqueu, K.; Amgoune, A.; Bourissou, D. *J. Am. Chem. Soc.* **2014**, *136*, 1778-1781.
- [5] Rekhroukh, F.; Brousses, R.; Amgoune, A.; Bourissou, D. *Angew. Chem. Int. Ed.* **2014**, *54*, 1266-1269.
- [6] Brandys, M.-C.; Jennings, M. C.; Puddephatt, R. J. *J. Chem. Soc. Dalton Trans.* **2000**, 4601-4606.
- [7] SAINT, SADABS, Programs for data correction, Bruker-AXS.
- [8] ShelXT, G. M. Sheldrick, University of Göttingen, *Acta Crystallogr. Sect. A* **2015**, *71*, 3-8.
- [9] ShelXL, G. M. Sheldrick, University of Göttingen, *Sect. C* **2015**, *71*, 3-8.
- [10] Spek, A. L., *Acta Crystallogr. Sect. C* **2015**, *71*, 9-18.
- [11] Gaussian 09, Revision D.01, Frisch, M. J.; Trucks, G. W.; Schlegel, H. B.; Scuseria, G. E.; Robb, M. A.; Cheeseman, J. R.; Scalmani, G.; Barone, V.; Mennucci, B.; Petersson, G. A.; Nakatsuji, H.; Caricato, M.; Li, X.; Hratchian, H. P.; Izmaylov, A. F.; Bloino, J.; Zheng, G.; Sonnenberg, J. L.; Hada, M.; Ehara, M.; Toyota, K.; Fukuda, R.; Hasegawa, J.; Ishida, M.; Nakajima, T.; Honda, Y.; Kitao, O.; Nakai, H.; Vreven, T.; Montgomery, J. A., Jr.; Peralta, J. E.; Ogliaro, F.; Bearpark, M.; Heyd, J. J.; Brothers, E.; Kudin, K. N.; Staroverov, V. N.; Kobayashi, R.; Normand, J.; Raghavachari, K.; Rendell, A.; Burant, J. C.; Iyengar, S. S.; Tomasi, J.; Cossi, M.; Rega, N.; Millam, J. M.; Klene, M.; Knox, J. E.; Cross, J. B.; Bakken, V.; Adamo, C.; Jaramillo, J.; Gomperts, R.; Stratmann, R. E.; Yazyev, O.; Austin, A. J.; Cammi, R.; Pomelli, C.; Ochterski, J. W.; Martin, R. L.; Morokuma, K.; Zakrzewski, V. G.; Voth, G. A.; Salvador, P.; Dannenberg, J. J.; Dapprich, S.; Daniels, A. D.; Farkas, Ö.; Foresman, J. B.; Ortiz, J. V.; Cioslowski, J.; Fox, D. J. Gaussian, Inc., Wallingford CT, 2009.
- [12] (a) Becke A. D. *J. Chem. Phys.*, **1993**, *98*, 5648-5652; (b) Perdew J. P., in *Electronic Structure of Solids '91*, Ed. P. Ziesche and H. Eschrig, Akademie Verlag, Berlin, **1991**, 11.
- [13] Marenich, A. V.; Cramer, C. J.; Truhlar, D. G. *J. Phys. Chem. B*, **2009**, *113*, 6378-6396.
- [14] Ehlers, A. W.; Bihme, M.; Dapprich, S.; Gobbi, A.; Hijllwarth, A.; Jonas, V.; Kiihler, K. F.; Stegmann, R.; Veldkamp, A.; Frenking, G. *Chem. Phys. Letters*, **1993**, *208*, 111-114.
- [15] (a) Fukui, K. *Acc. Chem. Res.*, **1981**, *14*, 363-368; (b) Hratchian, H. P.; Schlegel, H. B. in *Theory and Applications of Computational Chemistry: The First 40 Years*, Ed. Dykstra, C. E.; Frenking, G.; Kim, K. S.; Scuseria, G.; Elsevier, Amsterdam, **2005**, 195.
- [16] (a) Reed, E.; Curtiss, L. A.; Weinhold, F. *Chem. Rev.* **1988**, *88*, 899-926; (b) Foster, J. P.; Weinhold, F. *J. Am. Chem. Soc.* **1980**, *102*, 7211-7218; (c) Reed, A. E.; Weinhold, F. *J. Chem. Phys.* **1985**, *83*, 1736-1740.
- [17] NBO 5.0 program, Glendening, E. D.; Badenhoop, J. K.; Reed, A. E.; Carpenter, J. E.; Bohmann, J. A.; Morales, C. M.; Weinhold, F. Theoretical Chemistry Institute, University of Wisconsin, Madison, **2001**.
- [18] Chemcraft - graphical software for visualization of quantum chemistry computations. <https://www.chemcraftprog.com>
